# Supplementary material for: Tandem Strecker/C(sp3)–H amination reactions for the construction of cyanide-functionalized imidazo[1,5-a]pyridines with NH4SCN as a cyanating agent
Source: Royal Society of Chemistry journal article supplement (doi:10.1039/d1qo01060c), 2021-01-01

## Electronic Supplementary Information

### Tandem Strecker/C(sp<sup>3</sup>)-H Amination Reactions for the Construction of Cyanide-Functionalized Imidazo[1,5-*a*]pyridines with NH<sub>4</sub>SCN as a Cyanating Agent

Qing Yang,<sup>ac</sup> Xiao-Tong Yan,<sup>c</sup> Cheng-Tao Feng,<sup>\*ac</sup> De-Xiang Chen,<sup>c</sup> Zhong-Zhong Yan<sup>c</sup> and Kun Xu<sup>\*b</sup>

<sup>a</sup>School of Pharmacy, Anhui University of Chinese Medicine; Anhui academy of Chinese medicine, Hefei, 230012, China.

<sup>b</sup>Faculty of Environment and Life, Beijing University of Technology, Beijing, 100124, China.

<sup>c</sup>Anhui University of Science and Technology, Huainan, 232001, China.

Email: fengct@mail.ustc.edu.cn; kunxu@bjut.edu.cn

#### Contents

|                                                                                  |     |
|----------------------------------------------------------------------------------|-----|
| General Information.....                                                         | S1  |
| Experimental Procedure.....                                                      | S2  |
| Characterization Data of Products .....                                          | S5  |
| <sup>1</sup> H NMR and <sup>13</sup> C NMR Spectra of synthesized products ..... | S14 |

# 1. General Information

All reagents were purchased from commercial sources and used without further purification. Thin layer chromatography (TLC) employed glass 0.20-0.25 mm silica gel plates. Flash chromatography columns were packed with 200-300 mesh silica gel in petroleum (boiling point is between 60-90 °C). Flash chromatography was conducted eluting with with PE/EA, and they are listed as volume/volume ratios.  $^1\text{H}$  NMR spectra were determined on 400 MHz spectrometer as solutions in  $\text{CDCl}_3$  or  $\text{DMSO-}d_6$ . Chemical shifts are expressed in parts per million ( $\delta$ ) and the signals were reported as s (singlet), d (doublet), t (triplet), m(multiplet), and coupling constants (J) were given in Hz.  $^{13}\text{C}$  NMR spectra were recorded at 100 MHz in  $\text{CDCl}_3$  or  $\text{DMSO-}d_6$  solution. Chemical shifts as internal standard are referenced to  $\text{CDCl}_3$  ( $\delta = 7.26$  for  $^1\text{H}$  and  $\delta = 77.0$  for  $^{13}\text{C}$  NMR) or  $\text{DMSO-}d_6$  ( $\delta = 2.50$  for  $^1\text{H}$  and  $\delta = 39.5$  for  $^{13}\text{C}$  NMR) as internal standard. High resolution mass spectra (HRMS) were measured using electrospray ionization (ESI) and the time-of-flight (TOF) mass analyzer, accurate masses are reported for the molecular ion + hydrogen ( $[\text{M}+\text{H}]^+$ ). Melting point was recorded on a Hanon MP430 Auto Melting Point System and were uncorrected.

## 2. Experimental Procedure

### 2.1 General procedure for the synthesis of **4**:

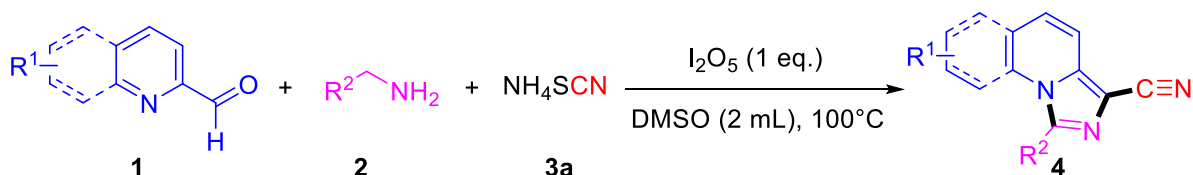

An oven-dried reaction vessel was charged with  $\text{NH}_4\text{SCN}$  **3a** (0.6 mmol, 46 mg), aldehyde **1** (0.3 mmol) and amine **2** (0.6 mmol) in DMSO (2 mL). After the mixture was stirred for 5 min at room temperature,  $\text{I}_2\text{O}_5$  (0.3 mmol, 100 mg) was added, and the mixture was further stirred at  $100^\circ\text{C}$  for 5 h. After completion of the reaction (TLC), the reaction mixture was allowed to cool to room temperature and quenched with saturated  $\text{Na}_2\text{S}_2\text{O}_3$  solution. Then the reaction mixture was extracted with ethyl acetate. The organic phase was dried over anhydrous  $\text{Na}_2\text{SO}_4$  and concentrated under reduced pressure to get the crude residue. Finally, it was purified by column chromatography on silica gel (200-300 mesh) using petroleum ether/ethylacetate as an eluent to afford the pure products **4**.

### 2.2 A procedure for the synthesis of **4aa** at 9 mmol scale

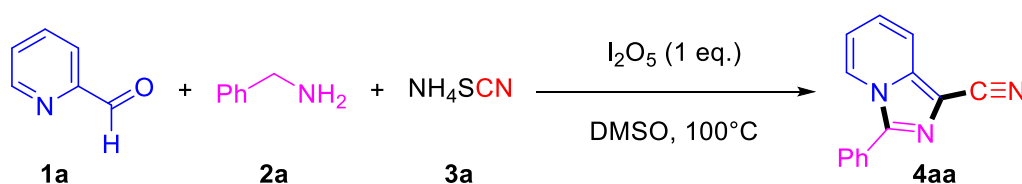

An oven-dried round-bottom flask (150 mL), equipped with reflux condenser, was charged with  $\text{NH}_4\text{SCN}$  **3a** (18 mmol, 1.37 g), pyridine-2-carboxaldehyde **1a** (9 mmol, 856  $\mu\text{L}$ ) and benzylamine **2a** (18 mmol, 1965  $\mu\text{L}$ ) in DMSO (60 mL). After the mixture was stirred for 5 min at room temperature,  $\text{I}_2\text{O}_5$  (9 mmol, 3.00 g) was added, and the mixture was further stirred at  $100^\circ\text{C}$  for 5 h. After completion of the reaction (TLC), the reaction mixture was allowed to cool to room temperature and quenched with saturated  $\text{Na}_2\text{S}_2\text{O}_3$  solution. Then the reaction mixture was extracted with ethyl acetate. The organic phase was dried over anhydrous  $\text{Na}_2\text{SO}_4$  and concentrated under reduced pressure to get the crude residue. Finally, it was purified by column chromatography on silica gel (200-300 mesh) using petroleum ether/ethylacetate (P:E = 3:1) as an eluent to afford the pure product **4aa** (1.82 g, 92%).

### 2.3 One-pot two-step synthesis of cyano-substituted imidazo[1,5-*a*]quinolones **4**

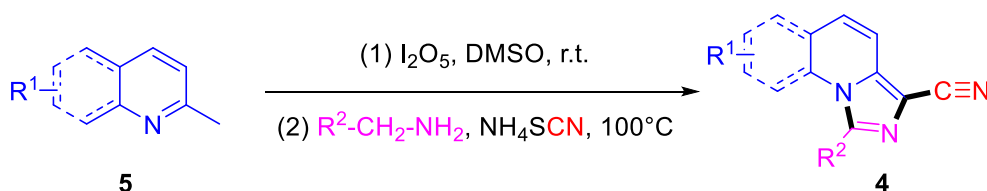

An oven-dried reaction vessel was charged with 2-methylquinoline **5** (0.3 mmol) and  $\text{I}_2\text{O}_5$  (0.3 mmol, 100 mg) in DMSO (2 mL), and the mixture was stirred at room temperature for 24 hours. After the **5** was completely consumed, amine **2** (0.6 mmol) and  $\text{NH}_4\text{SCN}$  **3a** (0.6 mmol, 46 mg) were added, and the mixture was further stirred at  $100^\circ\text{C}$  for 5 h. After completion of the reaction (TLC), the reaction mixture was allowed to cool to room temperature and quenched

with saturated  $\text{Na}_2\text{S}_2\text{O}_3$  solution. Then the reaction mixture was extracted with ethyl acetate. The organic phase was dried over anhydrous  $\text{Na}_2\text{SO}_4$  and concentrated under reduced pressure to get the crude residue. Finally, it was purified by column chromatography on silica gel (200-300 mesh) using petroleum ether/ethylacetate as an eluent to afford the pure products **4**.

## 2.4 Preliminary mechanistic studies

1) L(-)-alpha-methylbenzylamine was used as substrate.

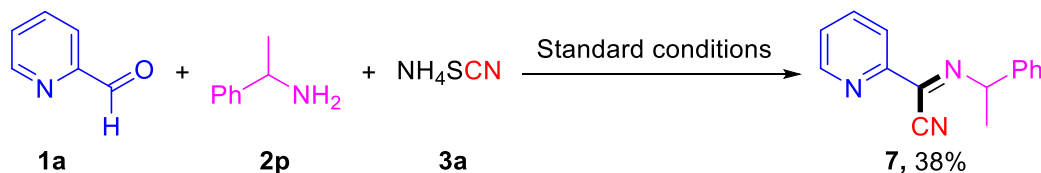

$\text{NH}_4\text{SCN}$  **3a** (0.6 mmol, 45.7 mg), pyridine-2-carboxaldehyde **1a** (0.3 mmol, 29  $\mu\text{L}$ ) and L(-)-alpha-methylbenzylamine **2p** (0.6 mmol, 77  $\mu\text{L}$ ) in DMSO (2mL) were taken in a sealed tube. Then  $\text{I}_2\text{O}_5$  (0.3 mmol, 100.1 mg) was added to it and stirred at room temperature for 5 min. Then the mixture was stirred at 100 °C for 5 h. After completion of the reaction (TLC), the reaction mixture was allowed to cool to room temperature and quenched with saturated  $\text{Na}_2\text{S}_2\text{O}_3$  solution. Then the reaction mixture was extracted with ethyl acetate. The organic phase was dried over anhydrous  $\text{Na}_2\text{SO}_4$  and concentrated under reduced pressure to get the crude residue. Finally, it was purified by column chromatography on silica gel (200-300 mesh) using petroleum ether/ethylacetate (P:E = 4:1) as an eluent to afford (Z)-N-(1-phenylethyl)picolinimidoyl cyanide **7** (27 mg, 38%) as an orange oil.

(Z)-N-(1-phenylethyl)picolinimidoyl cyanide **7**:  $^1\text{H}$  NMR (400 MHz, Chloroform-d)  $\delta$  8.75 – 8.72 (m, 1H), 8.16 (dt,  $J = 8.0, 1.1$  Hz, 1H), 7.78 (td,  $J = 7.8, 1.7$  Hz, 1H), 7.51 – 7.48 (m, 2H), 7.42 – 7.35 (m, 3H), 7.31 – 7.27 (m, 1H), 5.28 (q,  $J = 6.5$  Hz, 1H), 1.67 (d,  $J = 6.6$  Hz, 3H);  $^{13}\text{C}$  NMR (100 MHz, Chloroform-d)  $\delta$  151.8, 149.6, 142.9, 141.5, 136.9, 128.8, 127.8, 126.8, 126.1, 121.5, 109.9, 67.7, 24.4; HRMS (ESI): calcd for  $\text{C}_{15}\text{H}_{14}\text{N}_3$   $[\text{M}+\text{H}]^+$  236.1182, found 236.1180.

2) A procedure for the synthesis of intermediate **6**

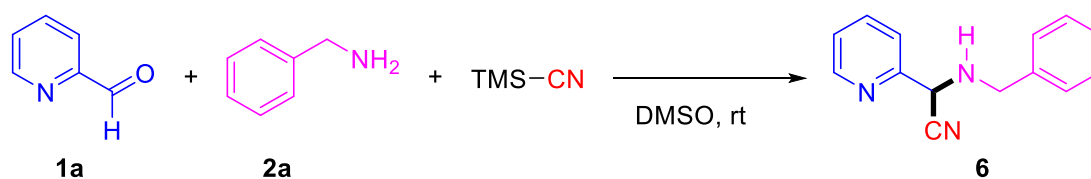

An oven-dried reaction vessel was charged with **1a** (0.3 mmol, 29  $\mu\text{L}$ ) and **2a** (0.6 mmol, 66  $\mu\text{L}$ ) in DMSO (2 mL), and the mixture was stirred at room temperature for 1 hours. After the **1a** was completely consumed, TMS-CN (0.6 mmol, 80  $\mu\text{L}$ ) was added, and the mixture was further stirred at room temperature for 6 h. After completion of the reaction (TLC), the reaction mixture was quenched with water. Then the reaction mixture was extracted with ethyl acetate. The organic phase was dried over anhydrous  $\text{Na}_2\text{SO}_4$  and concentrated under reduced pressure to get the crude residue. Finally, it was purified by column chromatography on silica gel (200-300 mesh) using petroleum ether/ethylacetate (P:E = 1:1) as an eluent to afford the compound **6** (44 mg, 65%) as a red oil.

2-(benzylamino)-2-phenylacetonitrile **6**:  $^1\text{H}$  NMR (400 MHz, Chloroform- $d$ )  $\delta$  8.55 (d,  $J$  = 5.0 Hz, 1H), 7.66 (td,  $J$  = 7.7, 1.6 Hz, 1H), 7.39 – 7.20 (m, 7H), 4.73 (s, 1H), 4.05 – 3.88 (m, 2H), 2.54 (s, 1H).  $^{13}\text{C}$  NMR (100 MHz, Chloroform- $d$ )  $\delta$  153.7, 149.9, 137.9, 137.4, 128.7, 128.5, 127.7, 123.9, 122.1, 118.3, 54.9, 51.5.

### 3) The synthesis of **4aa** from **6**

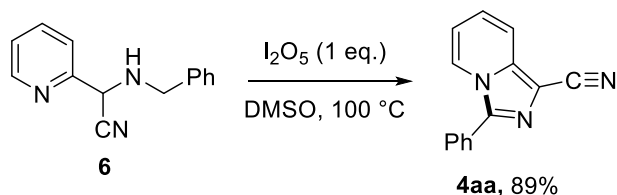

An oven-dried reaction vessel was charged with **6** (0.3mmol, 66.9 mg) and  $\text{I}_2\text{O}_5$  (0.3mmol, 100.1 mg) in DMSO (2 mL), and the mixture was stirred at 100  $^\circ\text{C}$  for 4 h. After completion of the reaction (TLC), the reaction mixture was allowed to cool to room temperature and quenched with saturated  $\text{Na}_2\text{S}_2\text{O}_3$  solution. Then the reaction mixture was extracted with ethyl acetate. The organic phase was dried over anhydrous  $\text{Na}_2\text{SO}_4$  and concentrated under reduced pressure to get the crude residue. Finally, it was purified by column chromatography on silica gel (200-300 mesh) using petroleum ether/ethylacetate (P:E = 3:1) as an eluent to afford the product **4aa** (58.5 mg, 89%).

### 4) The starch-iodine test

After the reaction, the starch-iodine test of the reaction mixture was carried out. As shown in Fig. S1, an obvious colour change, which suggests the formation of iodine during the reaction.

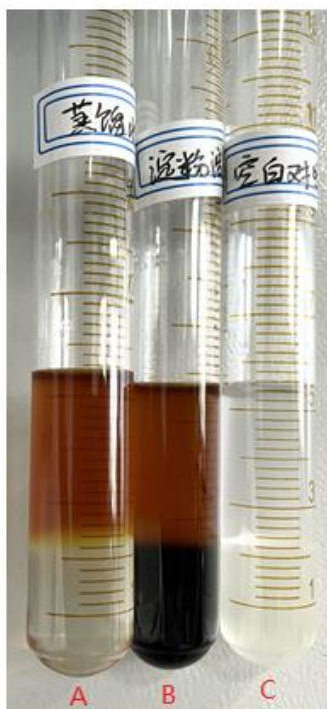

**Fig S1.** The result of starch iodine test. (A) Upper liquid: the reaction solution diluted with ethyl acetate; bottom liquid: distilled water. (B) Upper liquid: the reaction solution diluted with ethyl acetate; bottom liquid: aqueous solution of starch. (C) Upper liquid: ethyl acetate; bottom liquid: aqueous solution of starch.

### 3. Characterization Data of Products

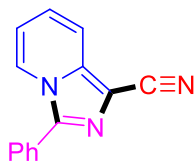

#### 3-Phenylimidazo[1,5-*a*]pyridine-1-carbonitrile (**4aa**):

Following the general procedure 2.1, compound **4aa** was obtained as a white crystalline solid in 95% yield (62.4 mg) by flash chromatography (P:E = 3:1); mp = 132-133 °C.

<sup>1</sup>H NMR (400 MHz, Chloroform-*d*) δ 8.35 (dt, *J* = 7.2, 1.1 Hz, 1H), 7.78 – 7.70 (m, 3H), 7.59 – 7.50 (m, 3H), 7.18 – 7.14 (m, 1H), 6.85 – 6.81 (m, 1H). <sup>13</sup>C NMR (100 MHz, Chloroform-*d*) δ 140.1, 137.7, 130.0, 129.3, 128.5, 128.4, 124.5, 122.9, 117.4, 115.3, 114.8, 103.6. HRMS (ESI): calcd for C<sub>14</sub>H<sub>10</sub>N<sub>3</sub> [M+H]<sup>+</sup> 220.0869, found 220.0869.

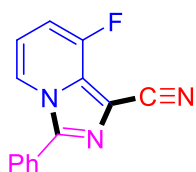

#### 8-Fluoro-3-phenylimidazo[1,5-*a*]pyridine-1-carbonitrile (**4ba**):

Following the general 2.1, compound **4ba** was obtained as a white crystalline solid in 81% yield (57.6 mg) by flash chromatography (P:E = 3:1); mp = 181-182 °C.

<sup>1</sup>H NMR (400 MHz, Chloroform-*d*) δ 8.17 (dd, *J* = 6.6, 1.0 Hz, 1H), 7.77 – 7.73 (m, 2H), 7.60 – 7.54 (m, 3H), 6.84 – 6.77 (m, 2H). <sup>13</sup>C NMR (100 MHz, Chloroform-*d*) δ 152.9 (<sup>1</sup>*J*<sub>CF</sub> = 256 Hz), 141.5, 130.4, 129.4, 128.6, 128.0, 119.4 (<sup>4</sup>*J*<sub>CF</sub> = 5 Hz), 114.7, 114.5 (<sup>3</sup>*J*<sub>CF</sub> = 7 Hz), 106.8 (<sup>2</sup>*J*<sub>CF</sub> = 16 Hz). HRMS (ESI): calcd for C<sub>14</sub>H<sub>9</sub>FN<sub>3</sub> [M+H]<sup>+</sup> 238.0775, found 238.0768.

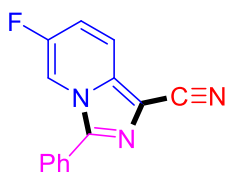

#### 6-Fluoro-3-phenylimidazo[1,5-*a*]pyridine-1-carbonitrile (**4ca**):

Following the general 2.1, compound **4ca** was obtained as a white crystalline solid in 92% yield (65.4 mg) by flash chromatography (P:E = 4:1); mp = 112-113 °C.

<sup>1</sup>H NMR (400 MHz, Chloroform-*d*) δ 8.28 (dd, *J* = 4.5, 1.9 Hz, 1H), 7.75 – 7.71 (m, 3H), 7.60 – 7.53 (m, 3H), 7.13 – 7.08 (m, 1H). <sup>13</sup>C NMR (100 MHz, Chloroform-*d*) δ 154.6 (<sup>1</sup>*J*<sub>CF</sub> = 244 Hz), 140.9, 135.3, 130.3, 129.4, 128.2, 128.0, 118.5 (<sup>3</sup>*J*<sub>CF</sub> = 9 Hz), 117.8, 117.5, 114.8, 109.7, 109.2, 104.9; HRMS (ESI): calcd for C<sub>14</sub>H<sub>9</sub>FN<sub>3</sub> [M+H]<sup>+</sup> 238.0775, found 238.0775.

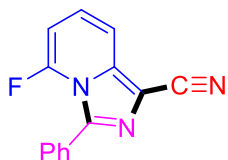

5-Fluoro-3-phenylimidazo[1,5-*a*]pyridine-1-carbonitrile (**4da**):

Following the general 2.1, compound **4da** was obtained as a white crystalline solid in 62% yield (44.1 mg) by flash chromatography (P:E = 3:1); mp = 167-169 °C.

<sup>1</sup>H NMR (400 MHz, Chloroform-*d*) δ 7.64 (ddd, *J* = 7.9, 3.8, 2.0 Hz, 2H), 7.57 – 7.46 (m, 4H), 7.19 – 7.14 (m, 1H), 6.47 (td, *J* = 7.0, 0.9 Hz, 1H). <sup>13</sup>C NMR (100 MHz, Chloroform-*d*) δ 149.3 (<sup>1</sup>*J*<sub>CF</sub> = 272 Hz), 140.0 (*J*<sub>CF</sub> = 2 Hz), 138.7 (*J*<sub>CF</sub> = 3 Hz), 129.89, 129.87, 129.84, 129.78, 129.75, 128.1, 125.7 (*J*<sub>CF</sub> = 5 Hz), 114.8, 113.1 (*J*<sub>CF</sub> = 6 Hz), 104.7, 95.2, 95.0. HRMS (ESI): calcd for C<sub>14</sub>H<sub>9</sub>FN<sub>3</sub> [M+H]<sup>+</sup> 238.0775, found 238.0775.

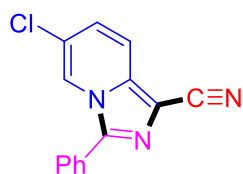

6-Chloro-3-phenylimidazo[1,5-*a*]pyridine-1-carbonitrile (**4ea**):

Following the general 2.1, compound **4ea** was obtained as a pale yellow crystalline solid in 98% yield (74.4 mg) by flash chromatography (P:E = 8:1); mp = 140-142 °C.

<sup>1</sup>H NMR (400 MHz, Chloroform-*d*) δ 8.36 (t, *J* = 1.3 Hz, 1H), 7.74 – 7.71 (m, 2H), 7.68 (dd, *J* = 9.5, 1.0 Hz, 1H), 7.60 – 7.54 (m, 3H), 7.11 (dd, *J* = 9.6, 1.6 Hz, 1H). <sup>13</sup>C NMR (100 MHz, Chloroform-*d*) δ 140.2, 135.7, 130.4, 129.5, 128.4, 127.8, 126.1, 123.7, 120.6, 117.9, 114.7, 104.8; HRMS (ESI): calcd for C<sub>14</sub>H<sub>9</sub>ClN<sub>3</sub> [M+H]<sup>+</sup> 254.0480, found 254.0480.

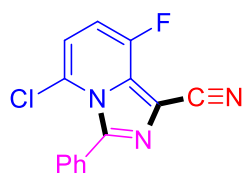

5-Chloro-8-fluoro-3-phenylimidazo[1,5-*a*]pyridine-1-carbonitrile (**4fa**):

Following the general 2.1, compound **4fa** was obtained as a white crystalline solid in 87% yield (70.7 mg) by flash chromatography (P:E = 4:1); mp = 178-179 °C.

<sup>1</sup>H NMR (400 MHz, Chloroform-*d*) δ 7.53 – 7.43 (m, 5H), 6.78 (d, *J* = 6.5 Hz, 2H). <sup>13</sup>C NMR (100 MHz, Chloroform-*d*) δ 151.6 (<sup>1</sup>*J*<sub>CF</sub> = 256 Hz), 142.7, 131.4, 131.1, 130.2, 129.9, 127.6, 122.5 (*J*<sub>CF</sub> = 5 Hz), 115.4 (*J*<sub>CF</sub> = 7 Hz), 114.0, 107.2 (*J*<sub>CF</sub> = 18 Hz), 103.3 (*J*<sub>CF</sub> = 4 Hz). HRMS (ESI): calcd for C<sub>14</sub>H<sub>8</sub>ClFN<sub>3</sub> [M+H]<sup>+</sup> 272.0385, found 272.0385.

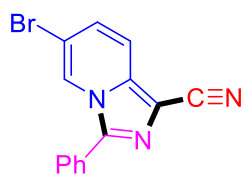

6-Bromo-3-phenylimidazo[1,5-*a*]pyridine-1-carbonitrile (**4ga**):

Following the general 2.1, compound **4ga** was obtained as a pale yellow crystalline solid in 85% yield (75.7 mg) by flash chromatography (P:E = 8:1); mp = 177-179 °C.

<sup>1</sup>H NMR (400 MHz, Chloroform-*d*) δ 8.47 (t, *J* = 1.2 Hz, 1H), 7.75 – 7.72 (m, 2H), 7.65 – 7.53 (m, 4H), 7.22 – 7.19 (m, 1H). <sup>13</sup>C NMR (100 MHz, Chloroform-*d*) δ 140.1, 135.7, 130.4, 129.5, 128.5, 128.0, 127.8, 122.8, 117.9, 114.7, 110.5, 104.9. HRMS (ESI): calcd for C<sub>14</sub>H<sub>9</sub>BrN<sub>3</sub> [M+H]<sup>+</sup> 297.9974, found 297.9963.

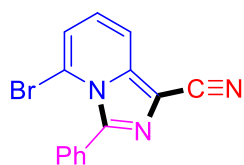

5-Bromo-3-phenylimidazo[1,5-*a*]pyridine-1-carbonitrile (**4ha**):

Following the general 2.1, compound **4ha** was obtained as a white crystalline solid in 78% yield (69.5 mg) by flash chromatography (P:E = 6:1); mp = 153-155 °C.

<sup>1</sup>H NMR (400 MHz, Chloroform-*d*) δ 7.76 (dd, *J* = 8.9, 1.2 Hz, 1H), 7.53 – 7.43 (m, 5H), 7.08 – 6.98 (m, 2H). <sup>13</sup>C NMR (100 MHz, Chloroform-*d*) δ 141.9, 139.7, 131.5, 130.6, 130.0, 127.5, 124.6, 121.2, 116.5, 114.7, 113.9, 104.1. HRMS (ESI): calcd for C<sub>14</sub>H<sub>9</sub>BrN<sub>3</sub> [M+H]<sup>+</sup> 297.9974, found 297.9960.

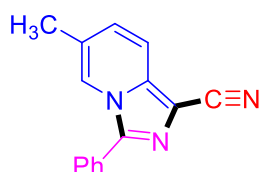

6-Methyl-3-phenylimidazo[1,5-*a*]pyridine-1-carbonitrile (**4ia**):

Following the general 2.1, compound **4ia** was obtained as a white crystalline solid in 83% yield (58.0 mg) by flash chromatography (P:E = 3:1); mp = 144-145 °C.

<sup>1</sup>H NMR (400 MHz, Chloroform-*d*) δ 8.11 (q, *J* = 1.3 Hz, 1H), 7.74 – 7.71 (m, 2H), 7.62 – 7.50 (m, 4H), 7.01 (dd, *J* = 9.3, 1.3 Hz, 1H), 2.31 (d, *J* = 1.2 Hz, 3H). <sup>13</sup>C NMR (100 MHz, Chloroform-*d*) δ 139.5, 136.8, 129.9, 129.2, 128.6, 128.5, 128.1, 124.9, 120.1, 116.6, 115.6, 103.2, 18.5. HRMS (ESI): calcd for C<sub>15</sub>H<sub>12</sub>N<sub>3</sub> [M+H]<sup>+</sup> 234.1026, found 234.1026.

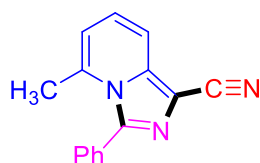

5-Methyl-3-phenylimidazo[1,5-*a*]pyridine-1-carbonitrile (**4ja**):

Following the general 2.1, compound **4ja** was obtained as a white crystalline solid in 56% yield (39.2 mg) by flash chromatography (P:E = 4:1); mp = 141-143 °C.

<sup>1</sup>H NMR (400 MHz, Chloroform-*d*) δ 7.62 (d, *J* = 9.0 Hz, 1H), 7.52 – 7.45 (m, 5H), 7.07 (dd, *J* = 9.1, 6.6 Hz, 1H), 6.54 (d, *J* = 6.7 Hz, 1H), 2.16 (s, 3H). <sup>13</sup>C NMR (100 MHz, Chloroform-*d*) δ 140.7, 139.0, 135.3, 132.0, 131.0, 129.9, 127.8, 124.9, 115.7, 115.5, 115.2, 102.7, 21.7. HRMS (ESI): calcd for C<sub>15</sub>H<sub>12</sub>N<sub>3</sub> [M+H]<sup>+</sup> 234.1026, found 234.1019.

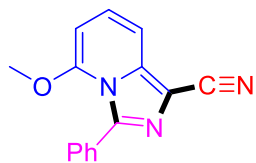

5-Methoxy-3-phenylimidazo[1,5-*a*]pyridine-1-carbonitrile (**4ka**):

Following the general 2.1, compound **4ka** was obtained as a gray crystalline solid in 60% yield (44.8 mg) by flash chromatography (P:E = 2:1); mp = 189-192 °C.



$^1\text{H}$  NMR (400 MHz, Chloroform-*d*)  $\delta$  7.56 – 7.53 (m, 2H), 7.44 – 7.32 (m, 4H), 7.14 (dd,  $J$  = 8.9, 7.3 Hz, 1H), 6.01 (dd,  $J$  = 7.3, 0.8 Hz, 1H), 3.84 (s, 3H).  $^{13}\text{C}$  NMR (100 MHz, Chloroform-*d*)  $\delta$  150.4, 139.9, 139.7, 131.9, 130.4, 128.9, 127.2, 126.5, 115.6, 108.9, 103.0, 89.9, 56.3. HRMS (ESI): calcd for  $\text{C}_{15}\text{H}_{12}\text{N}_3\text{O}$   $[\text{M}+\text{H}]^+$  250.0975, found 250.0968.

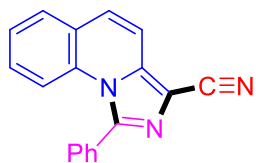

1-Phenylimidazo[1,5-*a*]quinoline-3-carbonitrile (**41a**):

Following the general 2.1, compound **41a** was obtained as a pale yellow crystalline solid in 98% yield (79.1 mg) by flash chromatography (P:E = 8:1); mp = 189-190 °C.

$^1\text{H}$  NMR (400 MHz, Chloroform-*d*)  $\delta$  7.76 (dd,  $J$  = 7.9, 1.5 Hz, 1H), 7.64 – 7.52 (m, 7H), 7.47 – 7.42 (m, 2H), 7.33 – 7.28 (m, 1H).  $^{13}\text{C}$  NMR (100 MHz, Chloroform-*d*)  $\delta$  143.6, 137.1, 132.1, 132.0, 130.4, 129.7, 129.4, 129.2, 129.0, 127.0, 126.5, 125.2, 117.5, 115.0, 114.8, 105.8. HRMS (ESI): calcd for  $\text{C}_{18}\text{H}_{12}\text{N}_3$   $[\text{M}+\text{H}]^+$  270.1026, found 270.1026.

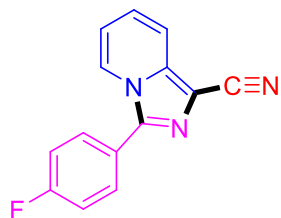

3-(4-Fluorophenyl)imidazo[1,5-*a*]pyridine-1-carbonitrile (**41b**):

Following the general 2.1, compound **41b** was obtained as a white crystalline solid in 96% yield (68.3 mg) by flash chromatography (P:E = 3:1); mp = 191-193 °C.

$^1\text{H}$  NMR (400 MHz, Chloroform-*d*)  $\delta$  8.28 (dt,  $J$  = 7.2, 1.1 Hz, 1H), 7.77 – 7.72 (m, 3H), 7.29 – 7.26 (m, 2H), 7.19 – 7.15 (m, 1H), 6.87 – 6.83 (m, 1H).  $^{13}\text{C}$  NMR (100 MHz, Chloroform-*d*)  $\delta$  163.5 ( $^1J_{\text{CF}}$  = 253 Hz), 139.1, 137.7, 130.6 ( $^3J_{\text{CF}}$  = 8 Hz), 124.7, 124.5 ( $^4J_{\text{CF}}$  = 3 Hz), 122.7, 117.5, 116.6 ( $^2J_{\text{CF}}$  = 22 Hz), 115.3, 115.1, 103.5. HRMS (ESI): calcd for  $\text{C}_{14}\text{H}_9\text{FN}_3$   $[\text{M}+\text{H}]^+$  238.0775, found 238.0766.

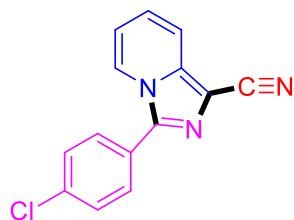

3-(4-Chlorophenyl)imidazo[1,5-*a*]pyridine-1-carbonitrile (**41c**):

Following the general 2.1, compound **41c** was obtained as a white crystalline solid in 98% yield (74.4 mg) by flash chromatography (P:E = 2.5:1); mp = 204-205 °C.

$^1\text{H}$  NMR (400 MHz, Chloroform-*d*)  $\delta$  8.31 (dt,  $J$  = 7.2, 1.1 Hz, 1H), 7.77 – 7.71 (m, 3H), 7.57 – 7.53 (m, 2H), 7.20 – 7.16 (m, 1H), 6.88 – 6.85 (m, 1H).  $^{13}\text{C}$  NMR (100 MHz, Chloroform-*d*)  $\delta$  138.9, 137.8, 136.2, 129.7, 129.6, 126.8, 124.7, 122.7, 117.6, 115.2, 115.2, 103.8. HRMS (ESI): calcd for  $\text{C}_{14}\text{H}_9\text{ClN}_3$   $[\text{M}+\text{H}]^+$  254.0480, found 254.0471.

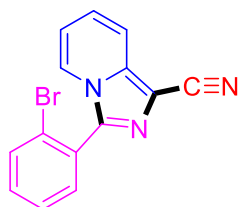

3-(2-Bromophenyl)imidazo[1,5-*a*]pyridine-1-carbonitrile (**4ad**):

Following the general 2.1, compound **4ad** was obtained as a pale yellow crystalline solid in 90% yield (80.2 mg) by flash chromatography (P:E = 3:1); mp = 171-173 °C.

<sup>1</sup>H NMR (400 MHz, Chloroform-*d*) δ 7.78 – 7.72 (m, 3H), 7.57 – 7.45 (m, 3H), 7.23 – 7.19 (m, 1H), 6.85 (td, *J* = 6.9, 1.2 Hz, 1H). <sup>13</sup>C NMR (100 MHz, Chloroform-*d*) δ 138.7, 137.1, 133.5, 133.4, 132.1, 129.6, 128.1, 124.9, 124.0, 123.7, 117.1, 115.3, 114.5, 103.0. HRMS (ESI): calcd for C<sub>14</sub>H<sub>9</sub>BrN<sub>3</sub> [M+H]<sup>+</sup> 297.9974, found 297.9964.

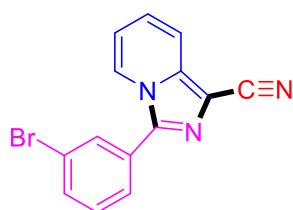

3-(3-Bromophenyl)imidazo[1,5-*a*]pyridine-1-carbonitrile (**4ae**):

Following the general 2.1, compound **4ae** was obtained as a white crystalline solid in 97% yield (86.4 mg) by flash chromatography (P:E = 3:1); mp = 198-200 °C.

<sup>1</sup>H NMR (400 MHz, Chloroform-*d*) δ 8.34 (dt, *J* = 7.2, 1.1 Hz, 1H), 7.94 (t, *J* = 1.8 Hz, 1H), 7.77 – 7.65 (m, 3H), 7.44 (t, *J* = 7.9 Hz, 1H), 7.22 – 7.18 (m, 1H), 6.91 – 6.87 (m, 1H). <sup>13</sup>C NMR (100 MHz, Chloroform-*d*) δ 138.4, 137.8, 133.1, 131.4, 130.8, 130.3, 126.9, 124.8, 123.4, 122.8, 117.6, 115.3, 115.1, 103.90. HRMS (ESI): calcd for C<sub>14</sub>H<sub>9</sub>BrN<sub>3</sub> [M+H]<sup>+</sup> 297.9974, found 297.9970.

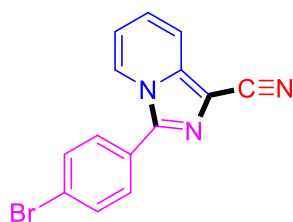

3-(4-Bromophenyl)imidazo[1,5-*a*]pyridine-1-carbonitrile (**4af**):

Following the general 2.1, compound **4af** was obtained as a white crystalline solid in 97% yield (86.4 mg) by flash chromatography (P:E = 3:1); mp = 204-205 °C.

<sup>1</sup>H NMR (400 MHz, Chloroform-*d*) δ 8.31 (dd, *J* = 7.2, 1.1 Hz, 1H), 7.75 – 7.63 (m, 5H), 7.20 – 7.16 (m, 1H), 6.87 (td, *J* = 6.9, 1.2 Hz, 1H). <sup>13</sup>C NMR (100 MHz, Chloroform-*d*) δ 138.9, 137.8, 132.6, 129.9, 127.3, 124.7, 124.4, 122.7, 117.6, 115.2, 115.1, 103.0. HRMS (ESI): calcd for C<sub>14</sub>H<sub>9</sub>BrN<sub>3</sub> [M+H]<sup>+</sup> 297.9974, found 297.9973.

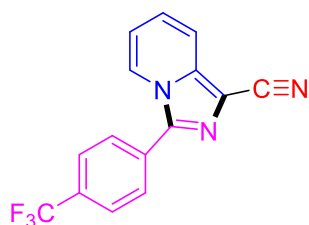

3-(4-(Trifluoromethyl)phenyl)imidazo[1,5-*a*]pyridine-1-carbonitrile (**4ag**):

Following the general 2.1, compound **4ag** was obtained as a white crystalline solid in 89% yield (76.6 mg) by flash chromatography (P:E = 2:1); mp = 157-158 °C.

<sup>1</sup>H NMR (400 MHz, Chloroform-*d*) δ 8.37 (dt, *J* = 7.2, 1.1 Hz, 1H), 7.94 – 7.92 (m, 2H), 7.84 – 7.77 (m, 3H), 7.24 – 7.20 (m, 1H), 6.93 – 6.89 (m, 1H). <sup>13</sup>C NMR (100 MHz, Chloroform-*d*) δ 138.4, 137.9, 131.9, 131.88, 131.6, 128.7, 126.3 (q, *J*<sub>CF3</sub> = 4 Hz), 125.0 (d, *J* = 3.0 Hz), 122.7, 122.3, 117.7, 115.5 (d, *J* = 3.0 Hz), 115.0 (d, *J* = 4.0 Hz). HRMS (ESI): calcd for C<sub>15</sub>H<sub>9</sub>F<sub>3</sub>N<sub>3</sub> [M+H]<sup>+</sup> 288.0743, found 288.0745.

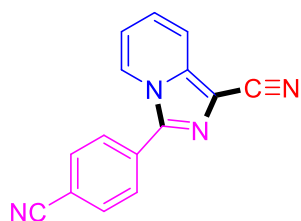

3-(4-Cyanophenyl)imidazo[1,5-*a*]pyridine-1-carbonitrile (**4ah**):

Following the general 2.1, compound **4ah** was obtained as a pale yellow crystalline solid in 97% yield (71.0 mg) by flash chromatography (P:E = 1:1.5); mp = 236-238 °C.

<sup>1</sup>H NMR (400 MHz, Chloroform-*d*) δ 8.38 (dt, *J* = 7.2, 1.1 Hz, 1H), 7.96 – 7.94 (m, 2H), 7.87 – 7.85 (m, 2H), 7.81 – 7.78 (m, 1H), 7.27 – 7.23 (m, 1H), 6.94 (td, *J* = 6.9, 1.2 Hz, 1H). <sup>13</sup>C NMR (100 MHz, DMSO-*d*<sub>6</sub>) δ 138.5, 138.4, 133.5, 132.9, 129.5, 127.2, 125.0, 118.9, 117.0, 116.4, 115.9, 112.3, 102.7. HRMS (ESI): calcd for C<sub>15</sub>H<sub>9</sub>N<sub>4</sub> [M+H]<sup>+</sup> 245.0822, found 245.0819.

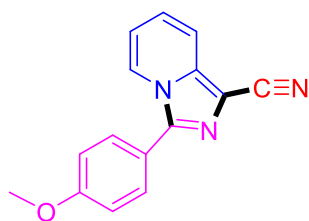

3-(4-Methoxyphenyl)imidazo[1,5-*a*]pyridine-1-carbonitrile (**4ai**):

Following the general 2.1, compound **4ai** was obtained as a pale yellow crystalline solid in 92% yield (68.7 mg) by flash chromatography (P:E = 2.5:1); mp = 129-131 °C.

<sup>1</sup>H NMR (400 MHz, Chloroform-*d*) δ 8.29 (dt, *J* = 7.2, 1.1 Hz, 1H), 7.72 – 7.66 (m, 3H), 7.15 – 7.05 (m, 3H), 6.82 – 6.79 (m, 1H), 3.89 (s, 3H). <sup>13</sup>C NMR (100 MHz, Chloroform-*d*) δ 160.9, 140.1, 137.5, 123.0, 124.4, 123.0, 120.6, 117.4, 115.6, 114.8, 114.7, 103.1, 55.5. HRMS (ESI): calcd for C<sub>15</sub>H<sub>12</sub>N<sub>3</sub>O [M+H]<sup>+</sup> 250.0975, found 250.0968.

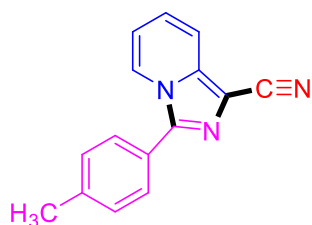

3-(P-tolyl)imidazo[1,5-*a*]pyridine-1-carbonitrile (**4aj**):

Following the general 2.1, compound **4aj** was obtained as a white crystalline solid in 68% yield (47.6 mg) by flash chromatography (P:E = 1:1); mp = 150-151 °C.

<sup>1</sup>H NMR (400 MHz, Chloroform-*d*) δ 8.33 (dd, *J* = 7.3, 1.1 Hz, 1H), 7.73 – 7.63 (m, 3H), 7.36 (d, *J* = 7.9 Hz, 2H), 7.14 (dd, *J* = 9.1, 6.5 Hz, 1H), 6.83 – 6.79 (m, 1H), 2.45 (s, 3H). <sup>13</sup>C NMR (100 MHz, Chloroform-*d*) δ 140.3, 140.3, 137.6, 130.0, 128.3, 125.4, 124.4, 123.0, 117.4, 115.5, 114.7, 103.3, 21.5. HRMS (ESI): calcd for C<sub>15</sub>H<sub>12</sub>N<sub>3</sub> [M+H]<sup>+</sup> 234.1026, found 234.1023.

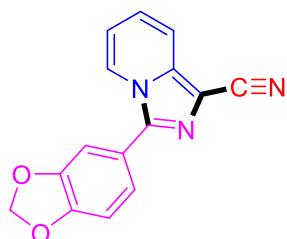

3-(Benzo[d][1,3]dioxol-5-yl)imidazo[1,5-*a*]pyridine-1-carbonitrile (**4ak**):

Following the general 2.1, compound **4ak** was obtained as a pale yellow crystalline solid in 40% yield (31.6 mg) by flash chromatography (P:E = 1:1); mp = 189-190 °C.

<sup>1</sup>H NMR (400 MHz, Chloroform-*d*) δ 8.30 (dt, *J* = 7.2, 1.1 Hz, 1H), 7.69 (dt, *J* = 9.1, 1.2 Hz, 1H), 7.23 – 7.11 (m, 3H), 6.96 (d, *J* = 8.0 Hz, 1H), 6.82 (td, *J* = 7.0, 1.2 Hz, 1H), 6.07 (s, 2H). <sup>13</sup>C NMR (100 MHz, Chloroform-*d*) δ 149.1, 148.5, 139.8, 137.6, 124.5, 123.0, 122.6, 121.9, 117.4, 115.5, 114.8, 109.0, 108.9, 103.1, 101.8. HRMS (ESI): calcd for C<sub>15</sub>H<sub>10</sub>N<sub>3</sub>O<sub>2</sub> [M+H]<sup>+</sup> 264.0768, found 264.0767.

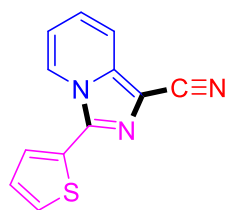

3-(Thiophen-2-yl)imidazo[1,5-*a*]pyridine-1-carbonitrile (**4al**):

Following the general 2.1, compound **4al** was obtained as a white crystalline solid in 55% yield (37.1 mg) by flash chromatography (P:E = 1:1); mp = 108-109 °C.

<sup>1</sup>H NMR (400 MHz, Chloroform-*d*) δ 8.46 (dt, *J* = 7.2, 1.1 Hz, 1H), 7.72 (dt, *J* = 9.2, 1.3 Hz, 1H), 7.59 (dd, *J* = 3.7, 1.1 Hz, 1H), 7.53 (dd, *J* = 5.1, 1.1 Hz, 1H), 7.23 – 7.16 (m, 2H), 6.92 (td, *J* = 6.9, 1.2 Hz, 1H). <sup>13</sup>C NMR (100 MHz, Chloroform-*d*) δ 137.7, 134.7, 129.9, 127.9, 127.9, 126.94, 124.6, 123.2, 117.4, 115.4, 115.1, 103.7. HRMS (ESI): calcd for C<sub>12</sub>H<sub>8</sub>N<sub>3</sub>S [M+H]<sup>+</sup> 226.0433, found 226.0429.

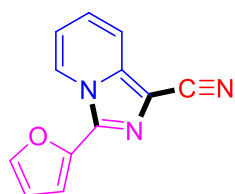

3-(Furan-2-yl)imidazo[1,5-*a*]pyridine-1-carbonitrile (**4am**):

Following the general 2.1, compound **4am** was obtained as a pale yellow crystalline solid in 92% yield (57.7 mg) by flash chromatography (P:E = 2:1); mp = 146-147 °C.

<sup>1</sup>H NMR (400 MHz, Chloroform-*d*) δ 8.82 (dt, *J* = 7.2, 1.1 Hz, 1H), 7.69 (dt, *J* = 9.1, 1.2 Hz, 1H), 7.61 (d, *J* = 1.7 Hz, 1H), 7.19 – 7.15 (m, 1H), 7.11 (d, *J* = 3.5 Hz, 1H), 6.91 (td, *J* = 7.0, 1.2 Hz, 1H), 6.62 (dd, *J* = 3.5, 1.8 Hz, 1H). <sup>13</sup>C NMR (100 MHz, Chloroform-*d*) δ 144.6, 143.1, 137.2, 131.9, 124.8, 124.6, 117.1, 115.3, 115.1, 112.1, 110.8, 103.7. HRMS (ESI): calcd for C<sub>12</sub>H<sub>8</sub>N<sub>3</sub>O [M+H]<sup>+</sup> 210.0662, found 210.0662.

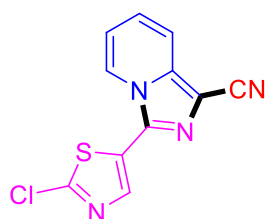

3-(2-Chlorothiazol-5-yl)imidazo[1,5-*a*]pyridine-1-carbonitrile (**4an**):

Following the general 2.1, compound **4an** was obtained as an orange crystalline solid in 98% yield (76.4 mg) by flash chromatography (P:E = 1:2); mp = 207-209 °C.

<sup>1</sup>H NMR (400 MHz, Chloroform-*d*) δ 8.34 (dt, *J* = 7.2, 1.1 Hz, 1H), 7.99 (s, 1H), 7.80 (dt, *J* = 9.2, 1.2 Hz, 1H), 7.28 (dd, *J* = 2.5, 0.9 Hz, 1H), 7.04 (td, *J* = 6.9, 1.2 Hz, 1H). <sup>13</sup>C NMR (100 MHz, DMSO-*d*<sub>6</sub>) δ 151.9, 139.99, 138.3, 131.2, 129.3, 127.3, 125.6, 117.0, 116.8, 115.4, 102.7. HRMS (ESI): calcd for C<sub>11</sub>H<sub>6</sub>ClN<sub>4</sub>S [M+H]<sup>+</sup> 260.9996, found 260.9995.

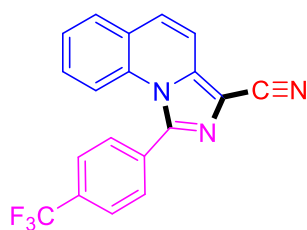

1-(4-(Trifluoromethyl)phenyl)imidazo[1,5-*a*]quinoline-3-carbonitrile (**4ap**):

Following the general 2.3, compound **4ap** was obtained as a pale yellow crystalline solid in 83% yield (83.9 mg) by flash chromatography (P:E = 2.5:1); mp = 200-203 °C.

<sup>1</sup>H NMR (400 MHz, Chloroform-*d*) δ 7.85 – 7.79 (m, 5H), 7.60 (d, *J* = 9.3 Hz, 1H), 7.53 – 7.48 (m, 3H), 7.38 (td, *J* = 7.8, 1.6 Hz, 1H). <sup>13</sup>C NMR (100 MHz, Chloroform-*d*) δ 141.9, 137.4, 135.6, 132.4, 132.1, 131.7, 130.2, 129.7, 129.2, 127.4, 126.8, 126.1 (q, *J*<sub>CF<sub>3</sub></sub> = 4 Hz), 125.3, 125.1, 122.4, 117.3, 114.74, 114.72, 106.4. HRMS (ESI): calcd for C<sub>19</sub>H<sub>11</sub>F<sub>3</sub>N<sub>3</sub> [M+H]<sup>+</sup> 338.0900, found 338.0900.

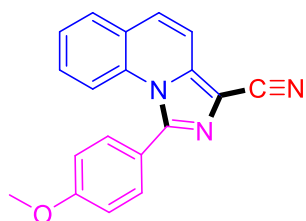

1-(4-Methoxyphenyl)imidazo[1,5-*a*]quinoline-3-carbonitrile (**4aq**):

Following the general 2.3, compound **4aq** was obtained as a white crystalline solid in 90% yield (80.8 mg) by flash chromatography (P:E = 1:1); mp = 212-213 °C.

<sup>1</sup>H NMR (400 MHz, Chloroform-*d*) δ 7.75 (dd, *J* = 7.8, 1.6 Hz, 1H), 7.62 – 7.53 (m, 4H), 7.47 – 7.40 (m, 2H), 7.35 – 7.30 (m, 1H), 7.09 – 7.06 (m, 2H), 3.93 (s, 3H). <sup>13</sup>C NMR (100 MHz, Chloroform-*d*) δ 161.1, 143.7, 137.1, 132.2, 131.1, 129.3, 128.9, 126.8, 126.4, 125.2, 124.1, 117.4, 115.2, 114.8, 114.5, 105.6, 55.5. HRMS (ESI): calcd for C<sub>19</sub>H<sub>14</sub>N<sub>3</sub>O [M+H]<sup>+</sup> 300.1131, found 300.1129.

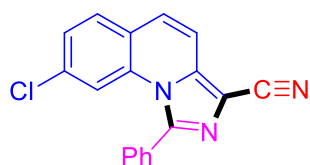

8-Chloro-1-phenylimidazo[1,5-*a*]quinoline-3-carbonitrile (**4ma**):

Following the general 2.3, compound **4ma** was obtained as a pale yellow crystalline solid in 55% yield (50.0 mg) by flash chromatography (P:E= 3:2); mp = 197-199 °C.

<sup>1</sup>H NMR (400 MHz, Chloroform-*d*) δ 7.70 – 7.57 (m, 7H), 7.48 (d, *J* = 1.9 Hz, 1H), 7.43 – 7.38 (m, 2H). <sup>13</sup>C NMR (100 MHz, DMSO-*d*<sub>6</sub>) δ 143.9, 137.2, 133.5, 132.5, 131.8, 131.6, 131.2, 130.2, 129.7, 127.4, 127.1, 124.1, 117.1, 115.6, 115.2, 104.5; HRMS (ESI): calcd for C<sub>18</sub>H<sub>11</sub>ClN<sub>3</sub> [M+H]<sup>+</sup> 304.0636, found 304.0634.

## 4. $^1\text{H}$ NMR and $^{13}\text{C}$ NMR Spectra of synthesized products

4aa  
360\$0/8

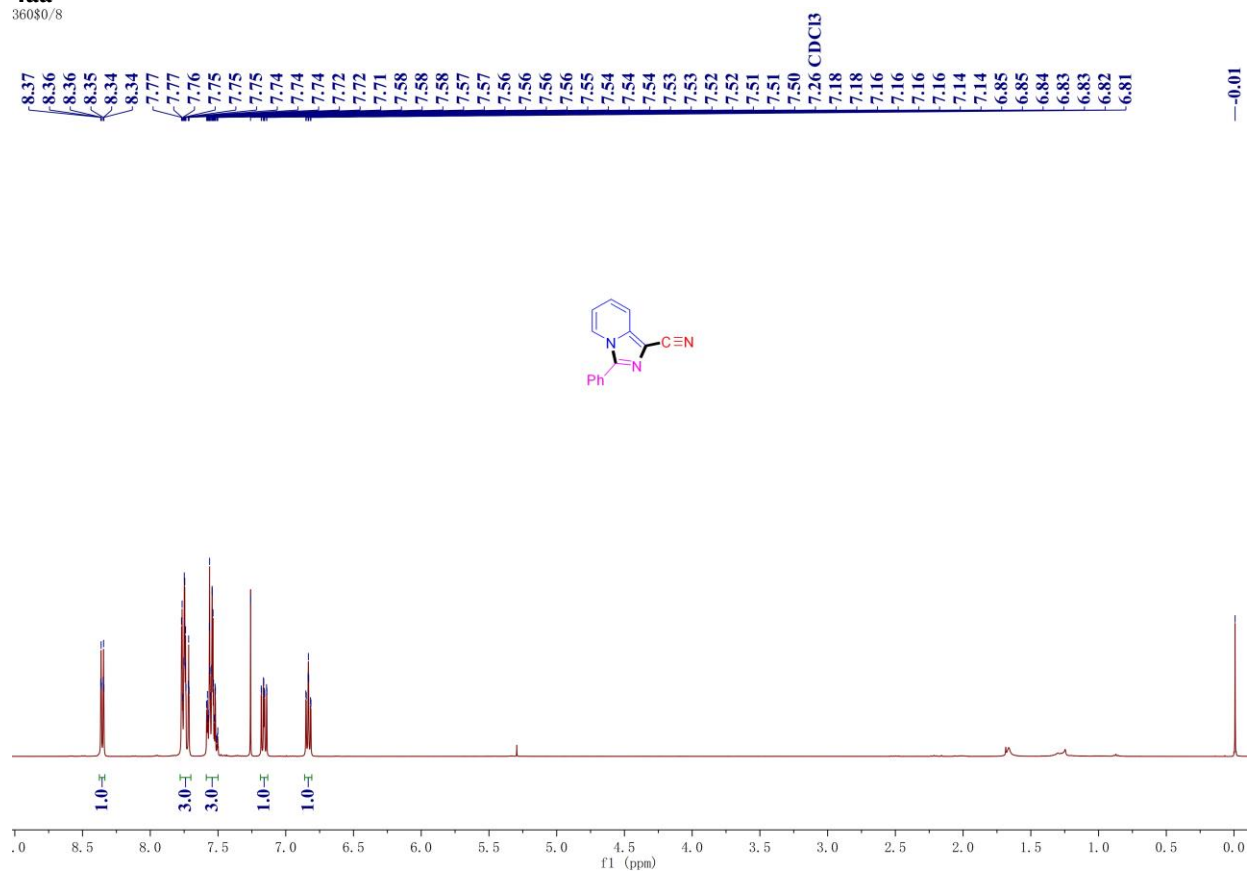

360\$1/11

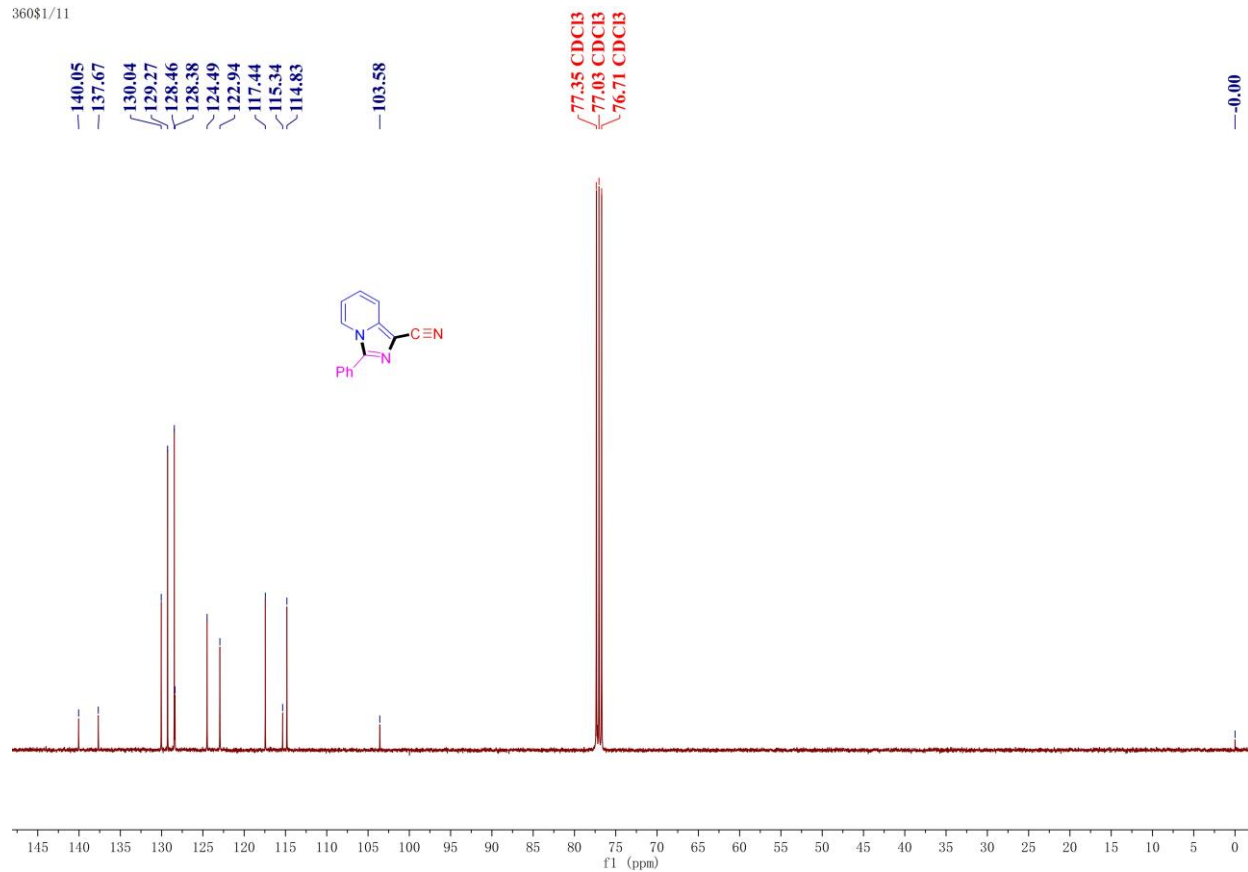

# 4ba

360\$1/17

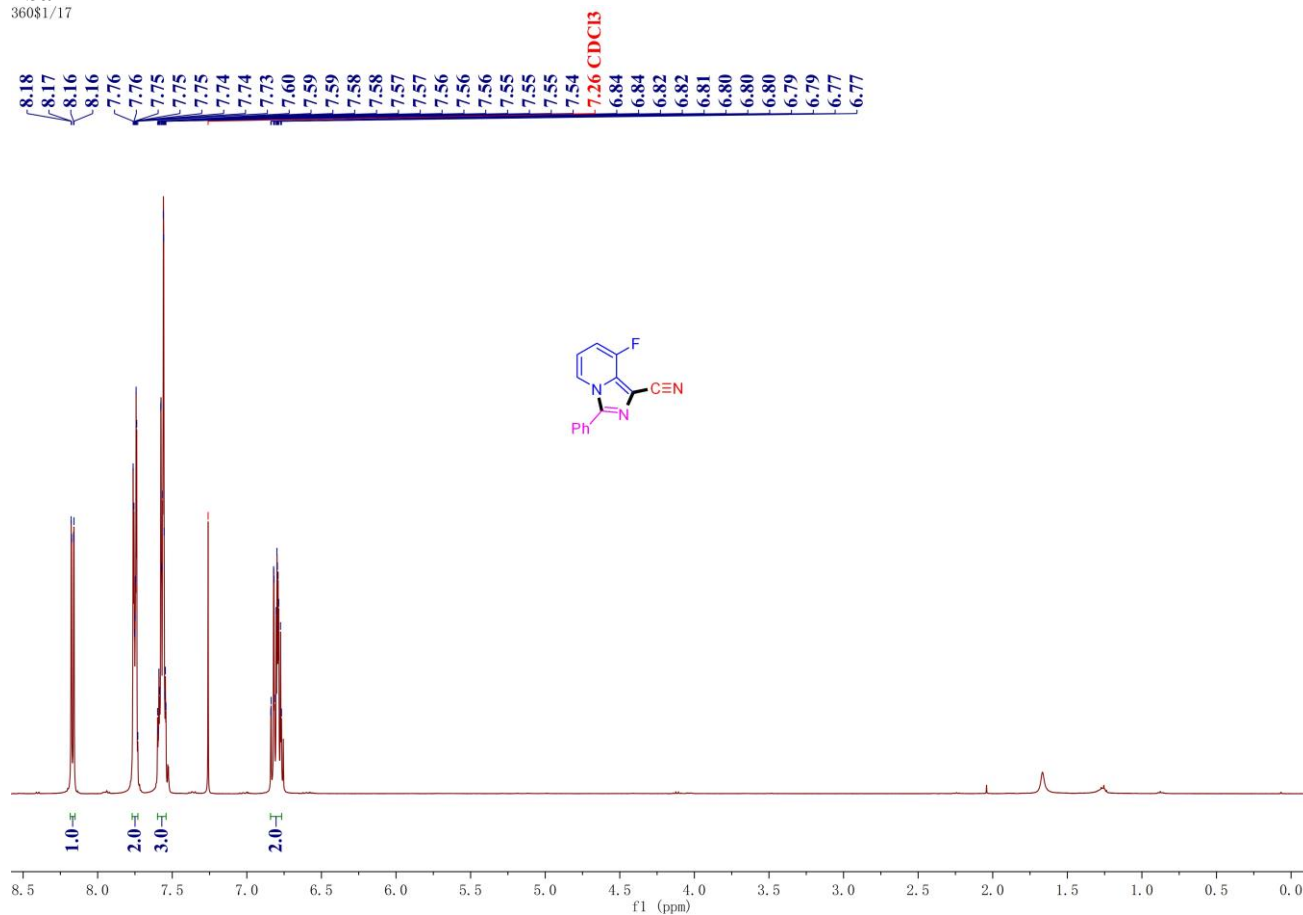

360\$2/18

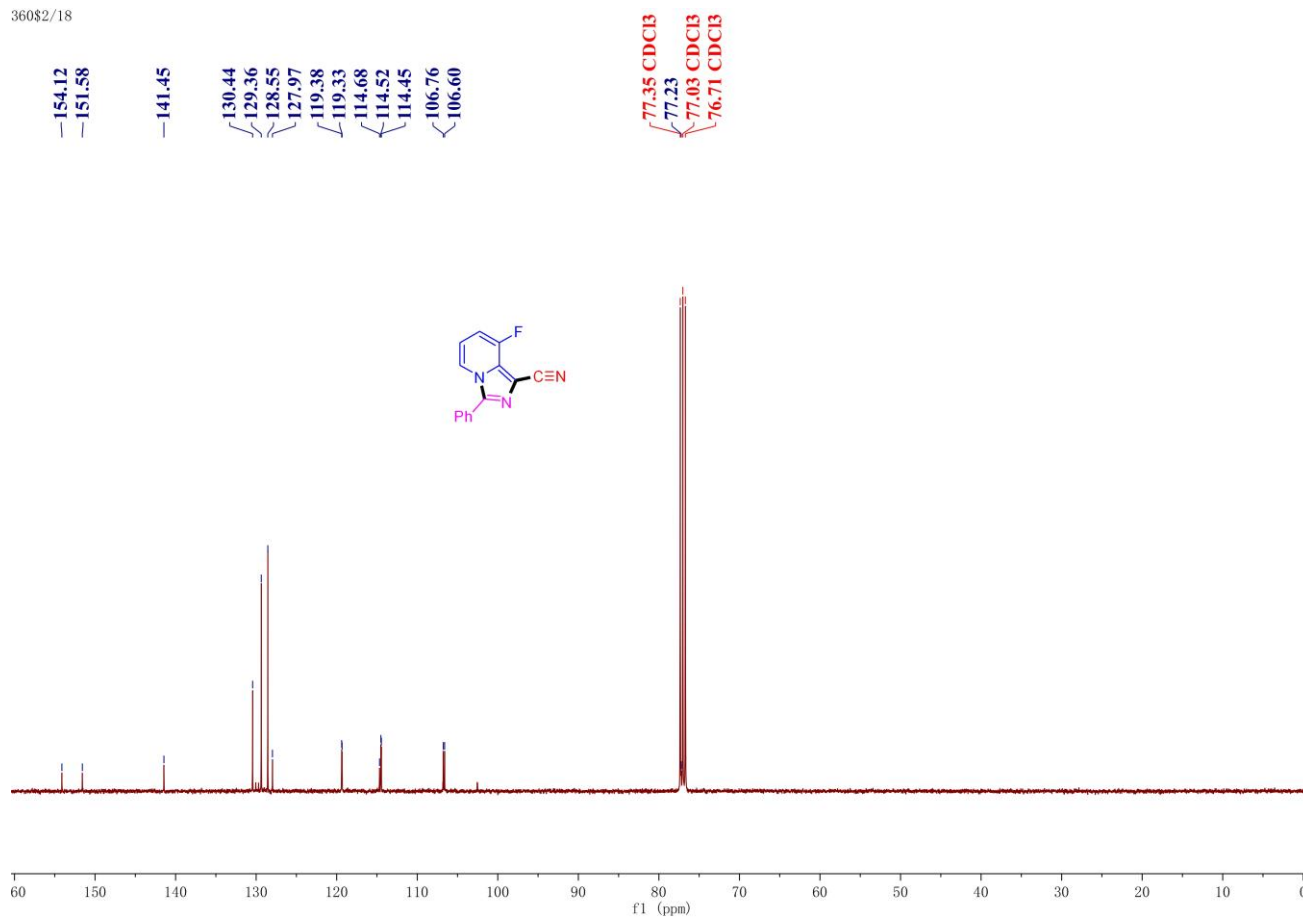



4ca  
360\$1/27

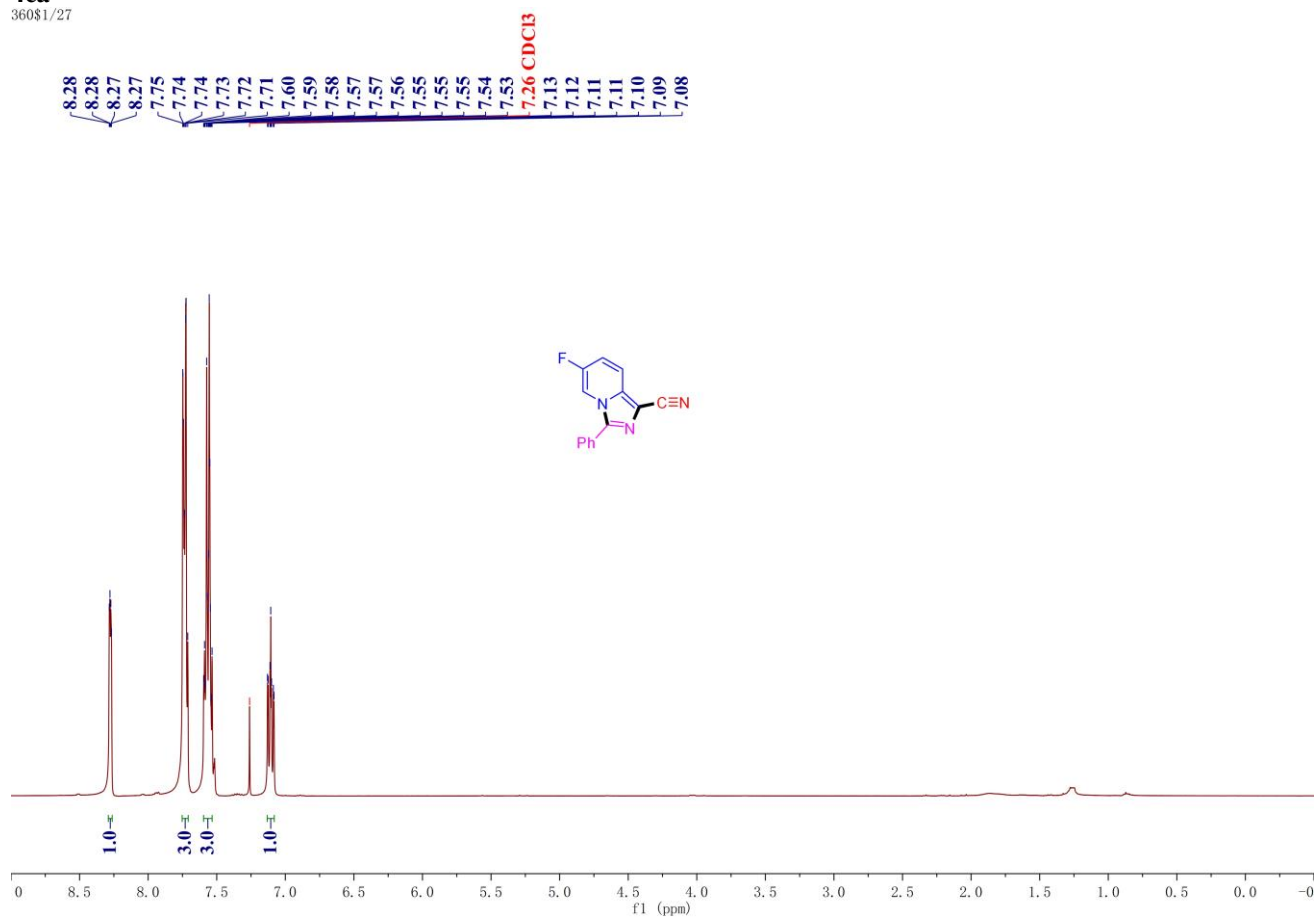

360\$2/28

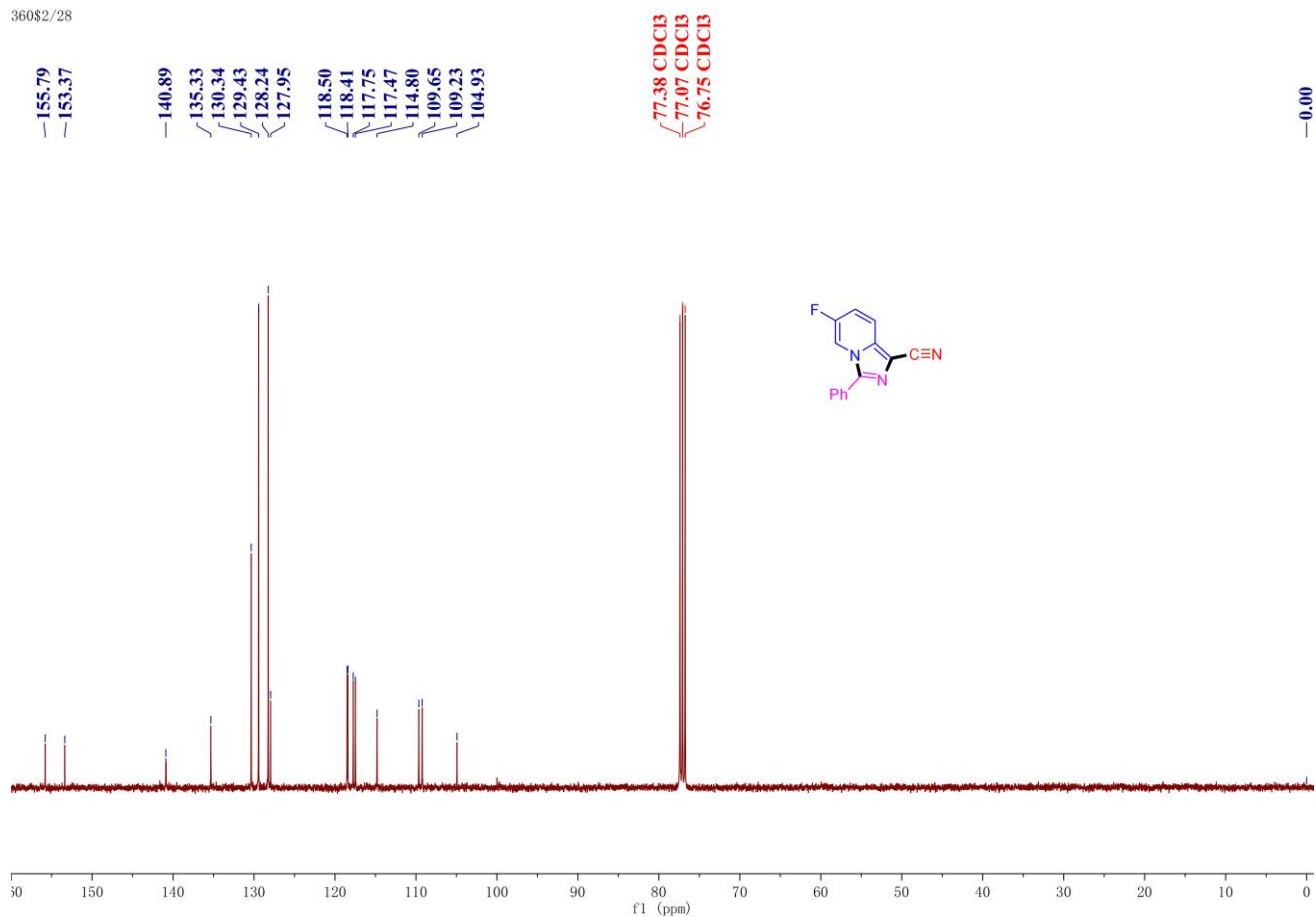

# 4da

360\$6/16

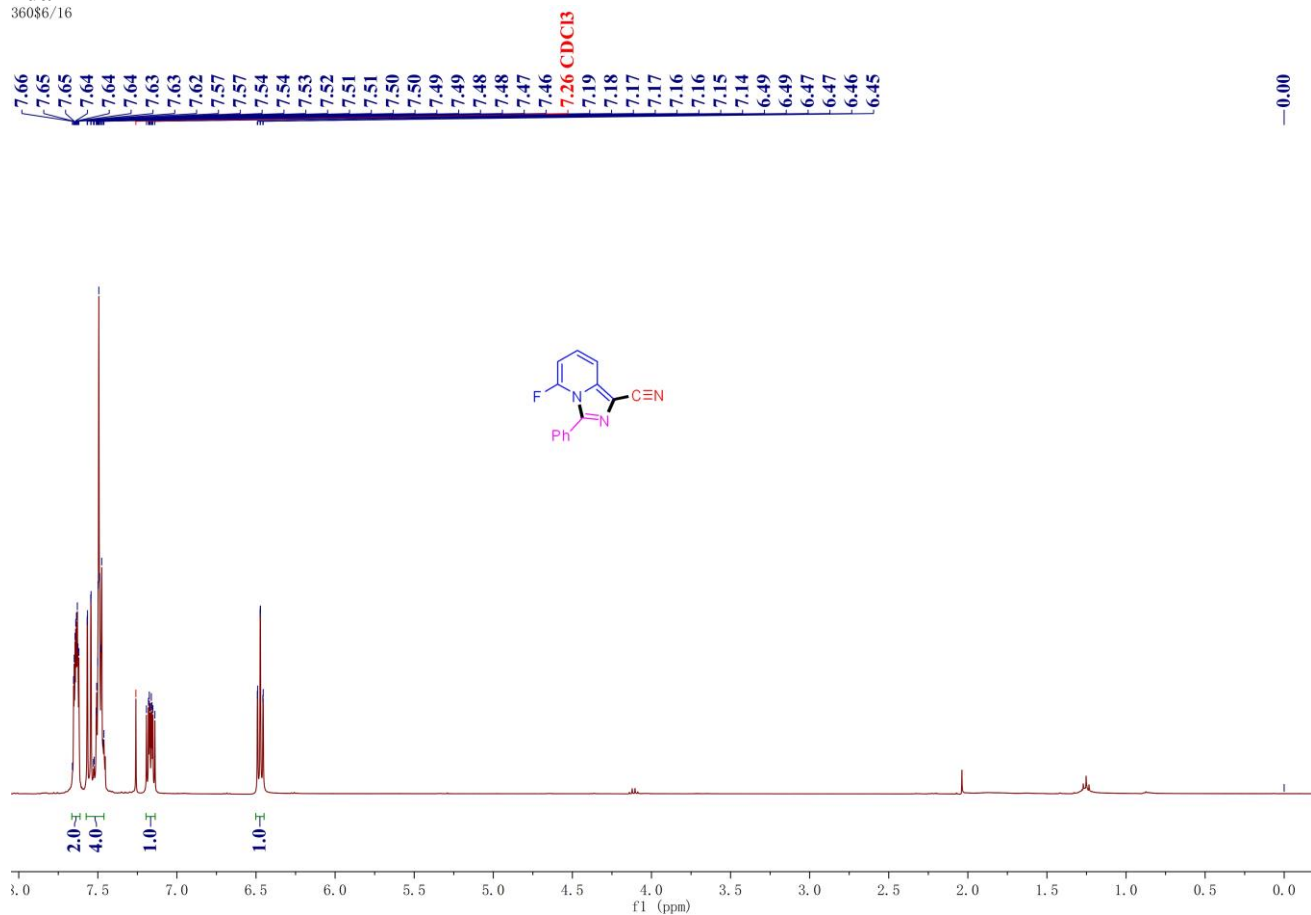

360\$5/10

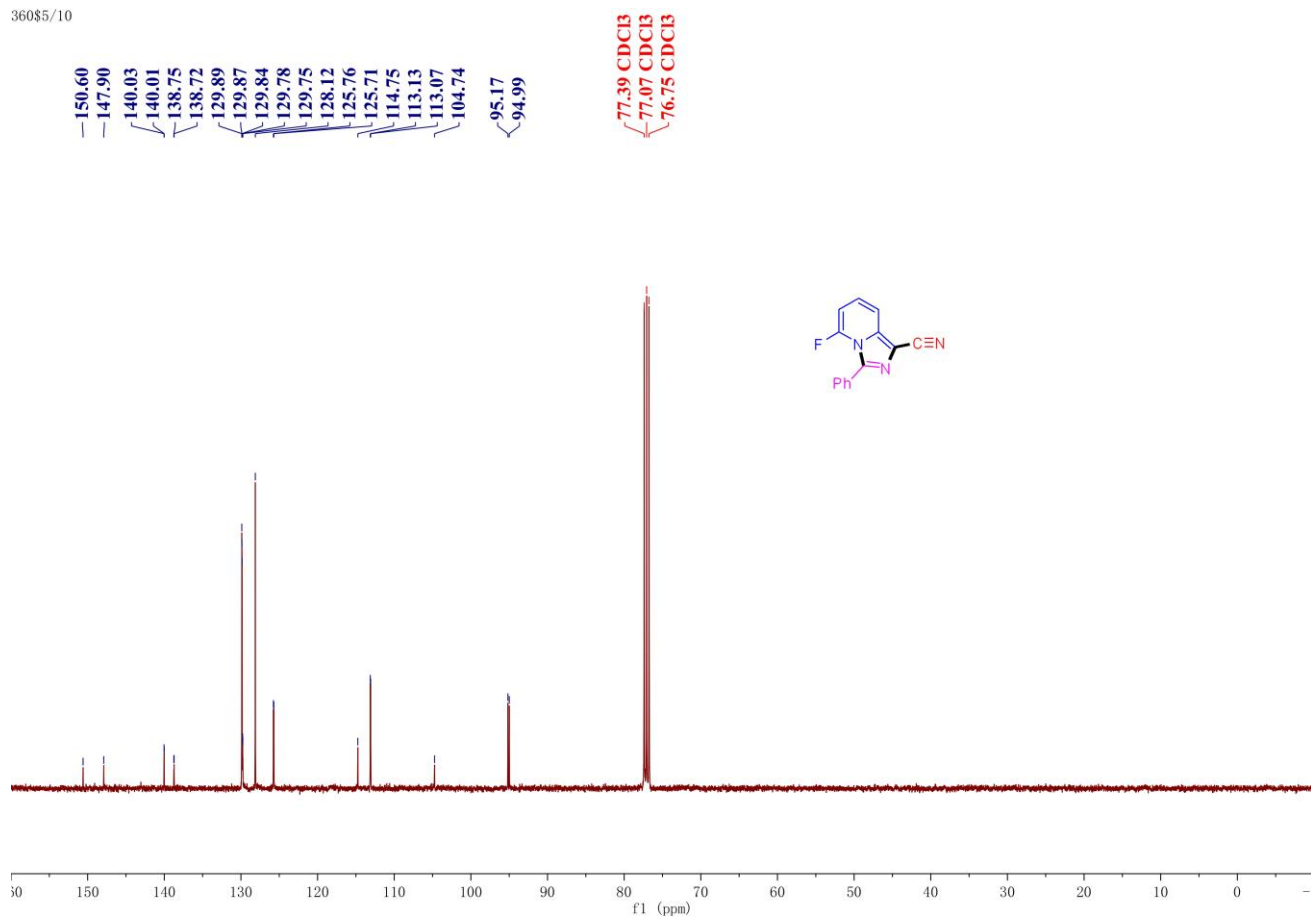

4ea  
360\$0/17

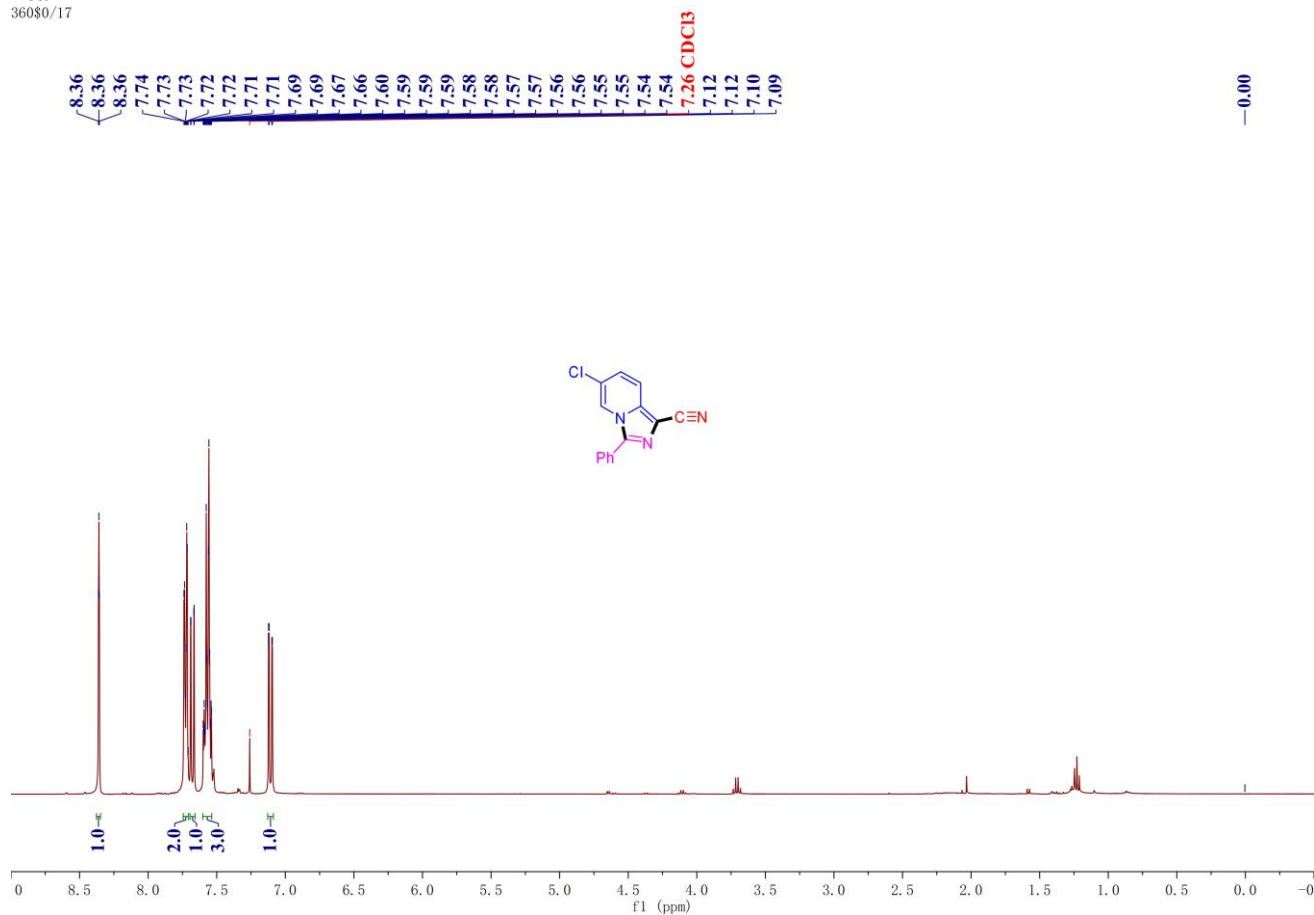

360\$1/18

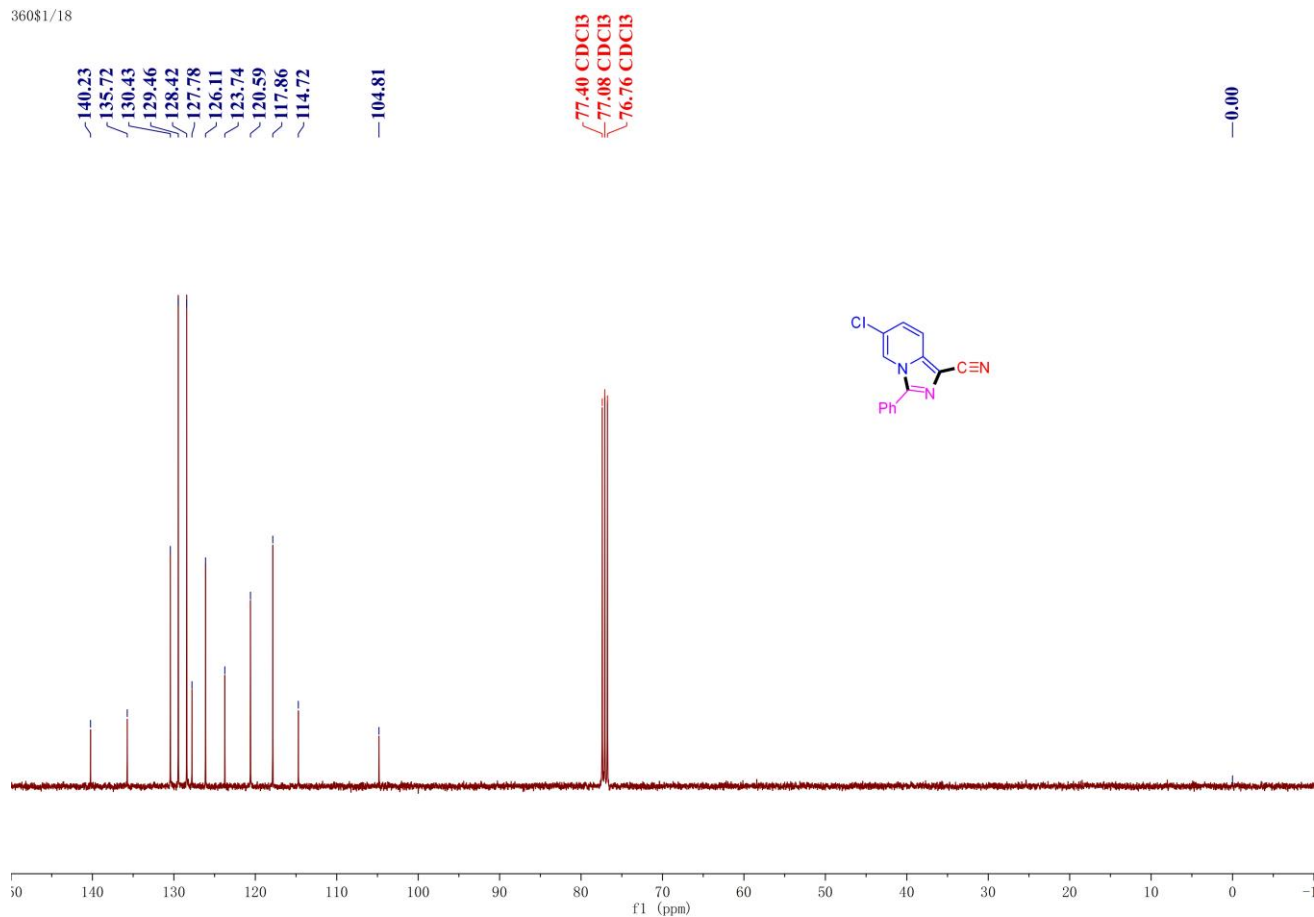

**4fa**

360\$7/23

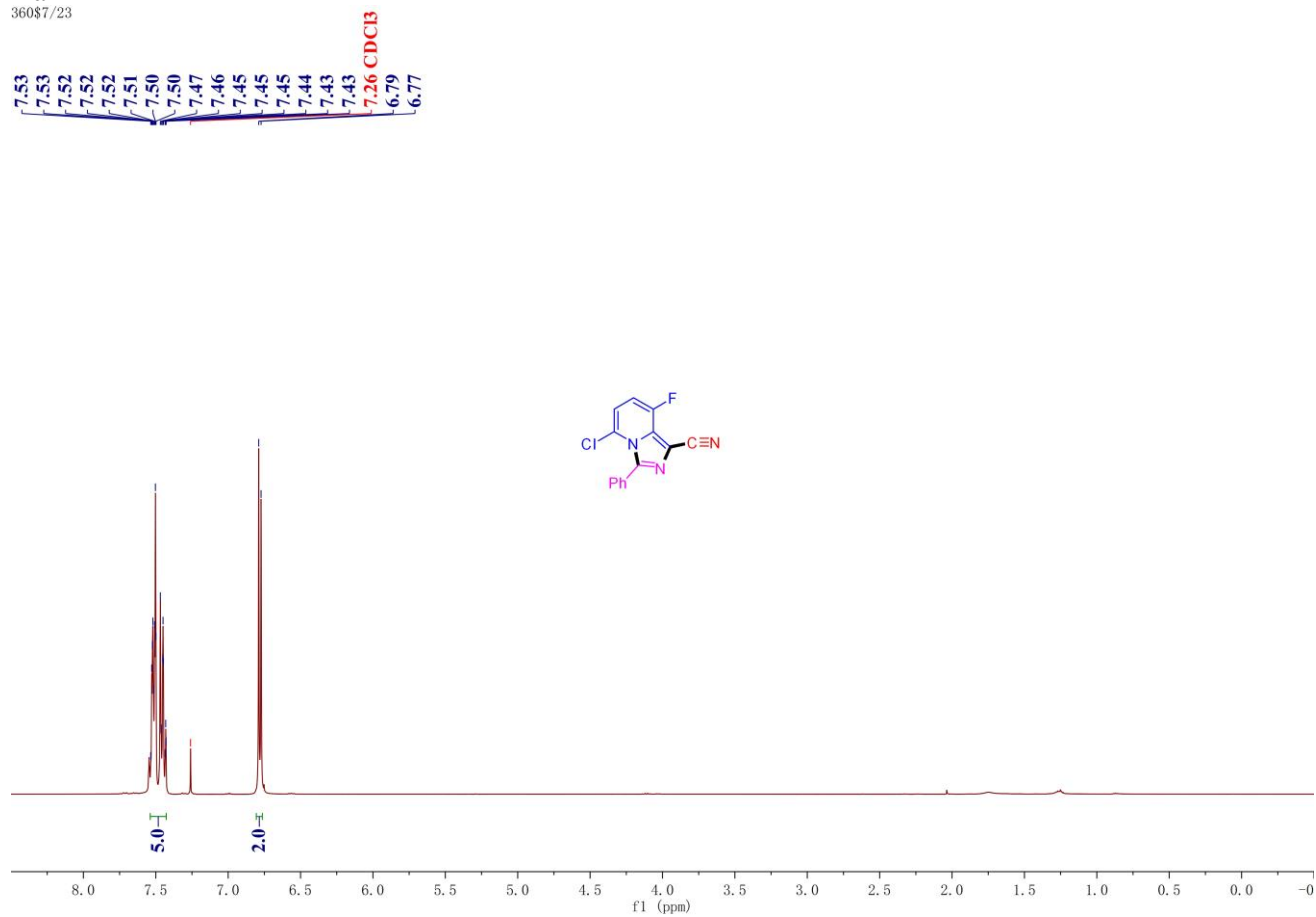

360\$8/24

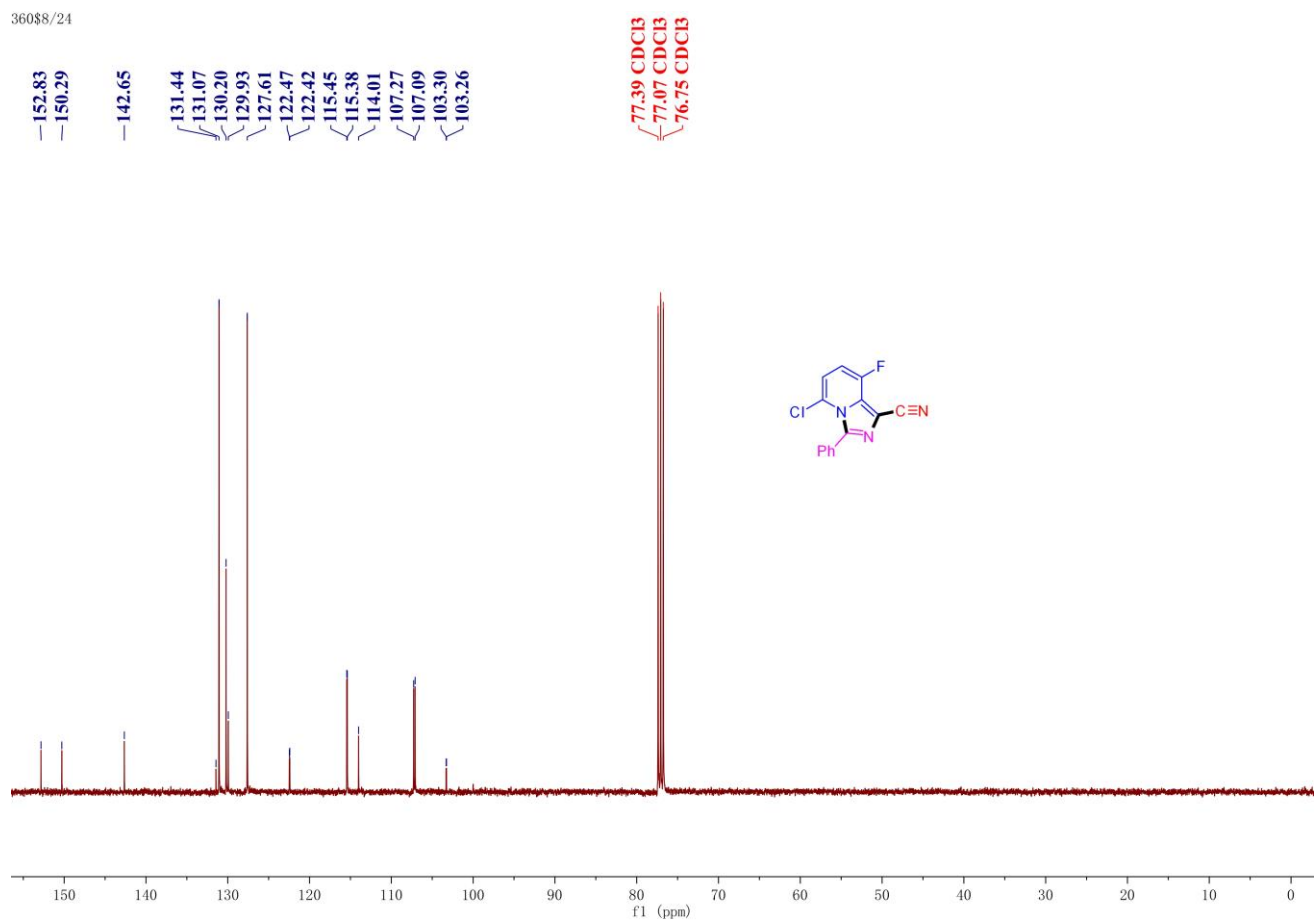

4ga  
360\$11/12

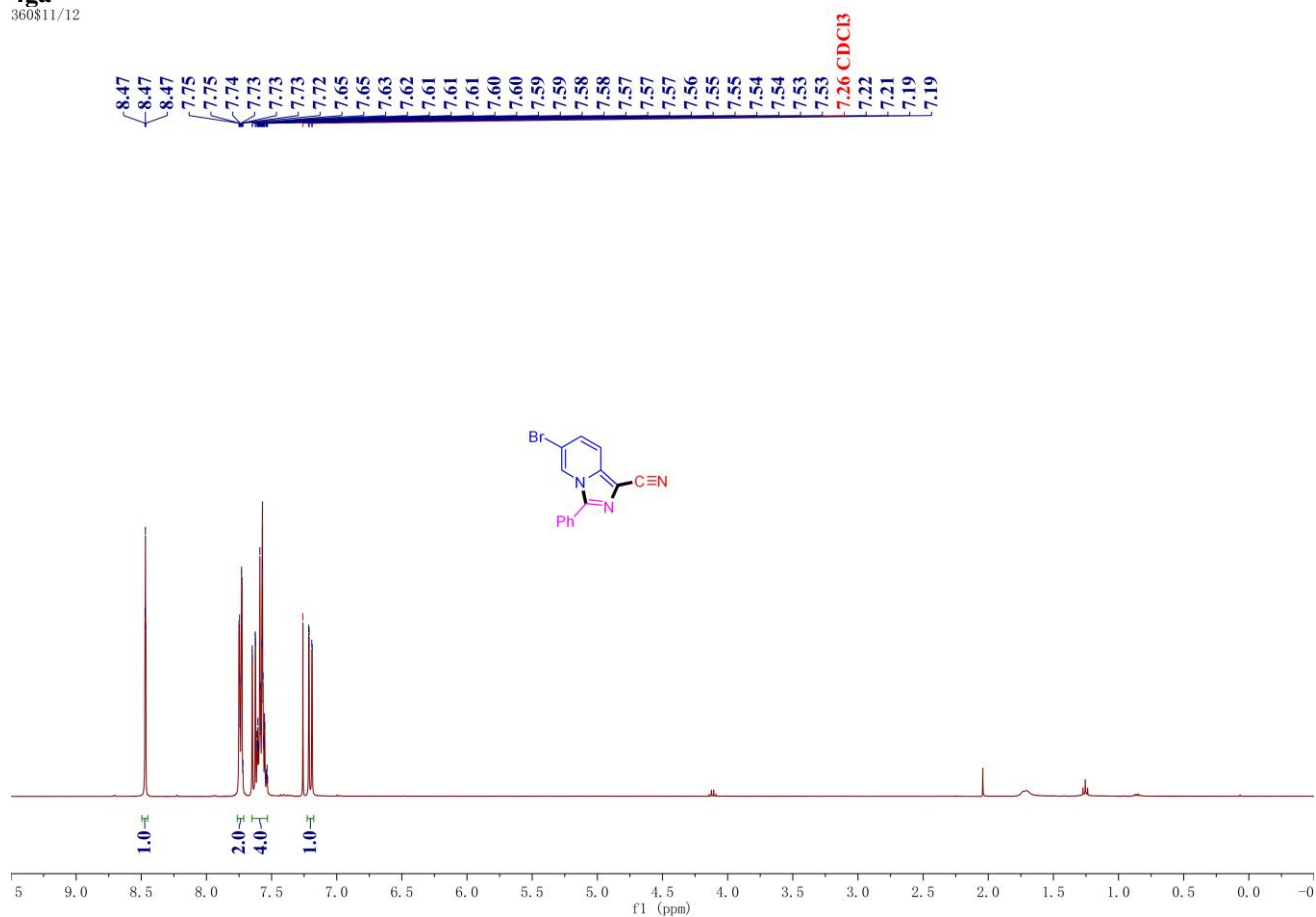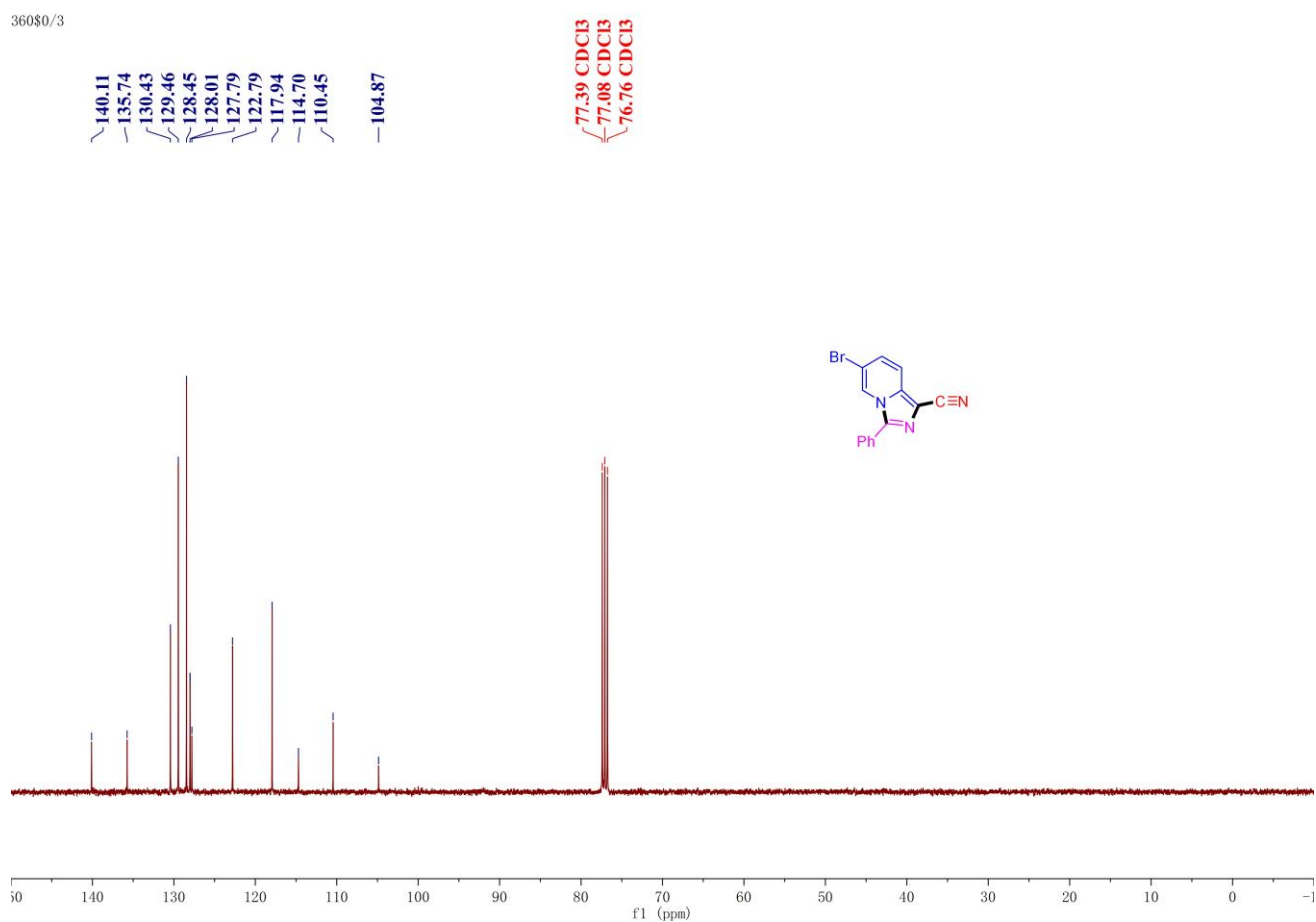

4ha

360\$13/10

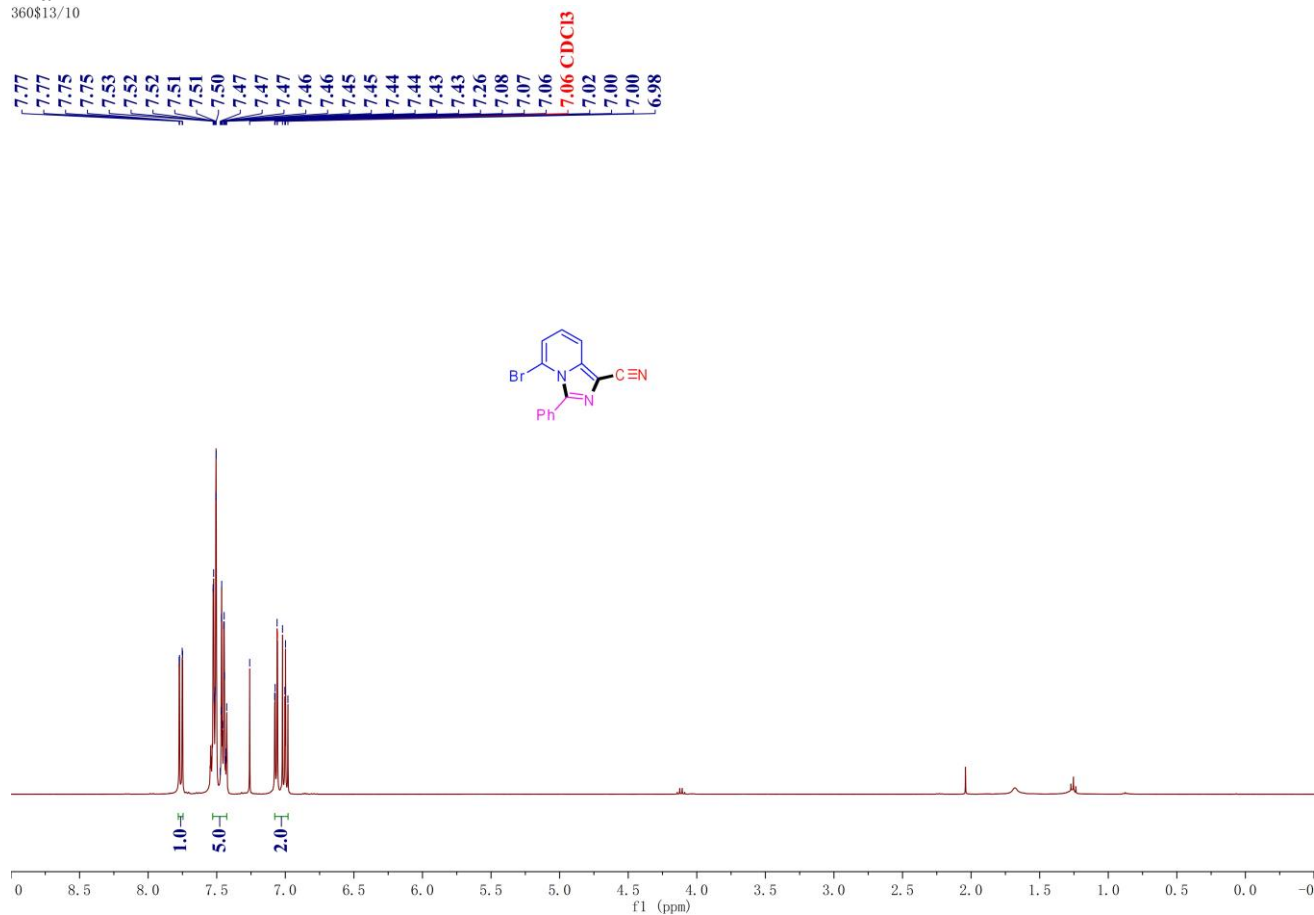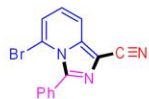

360\$2/2

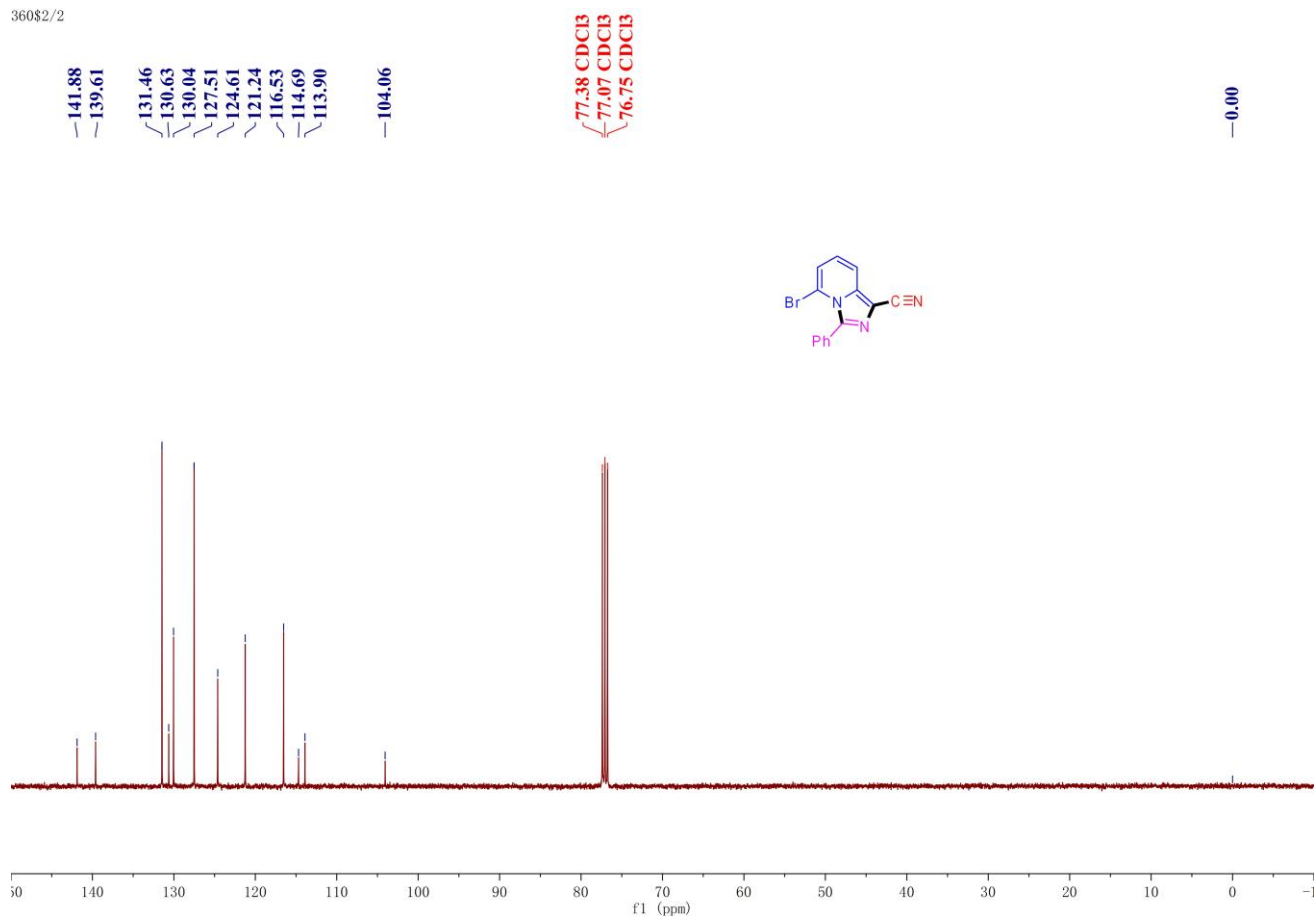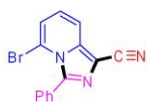

4ia

360\$3/15

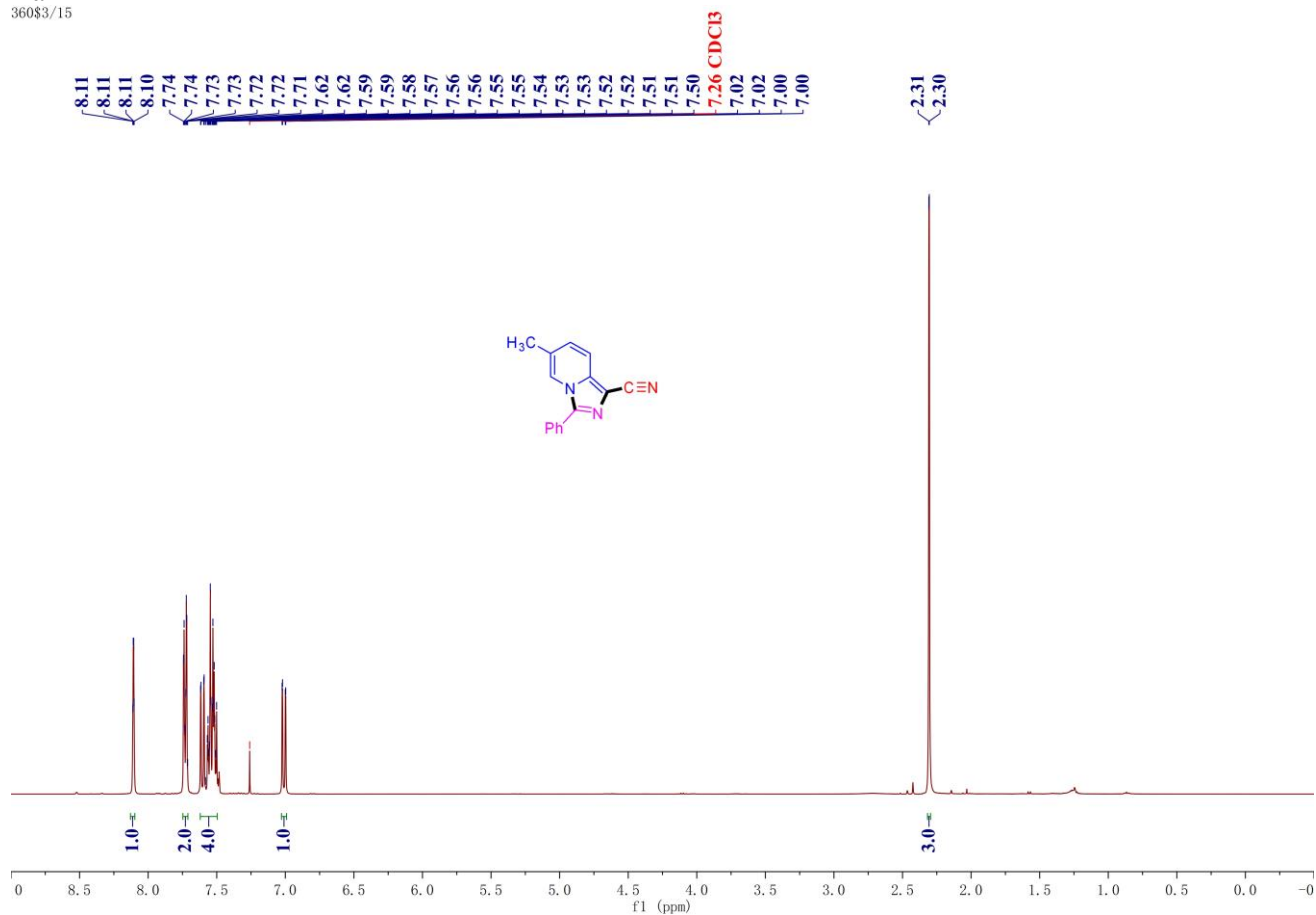

360\$2/12

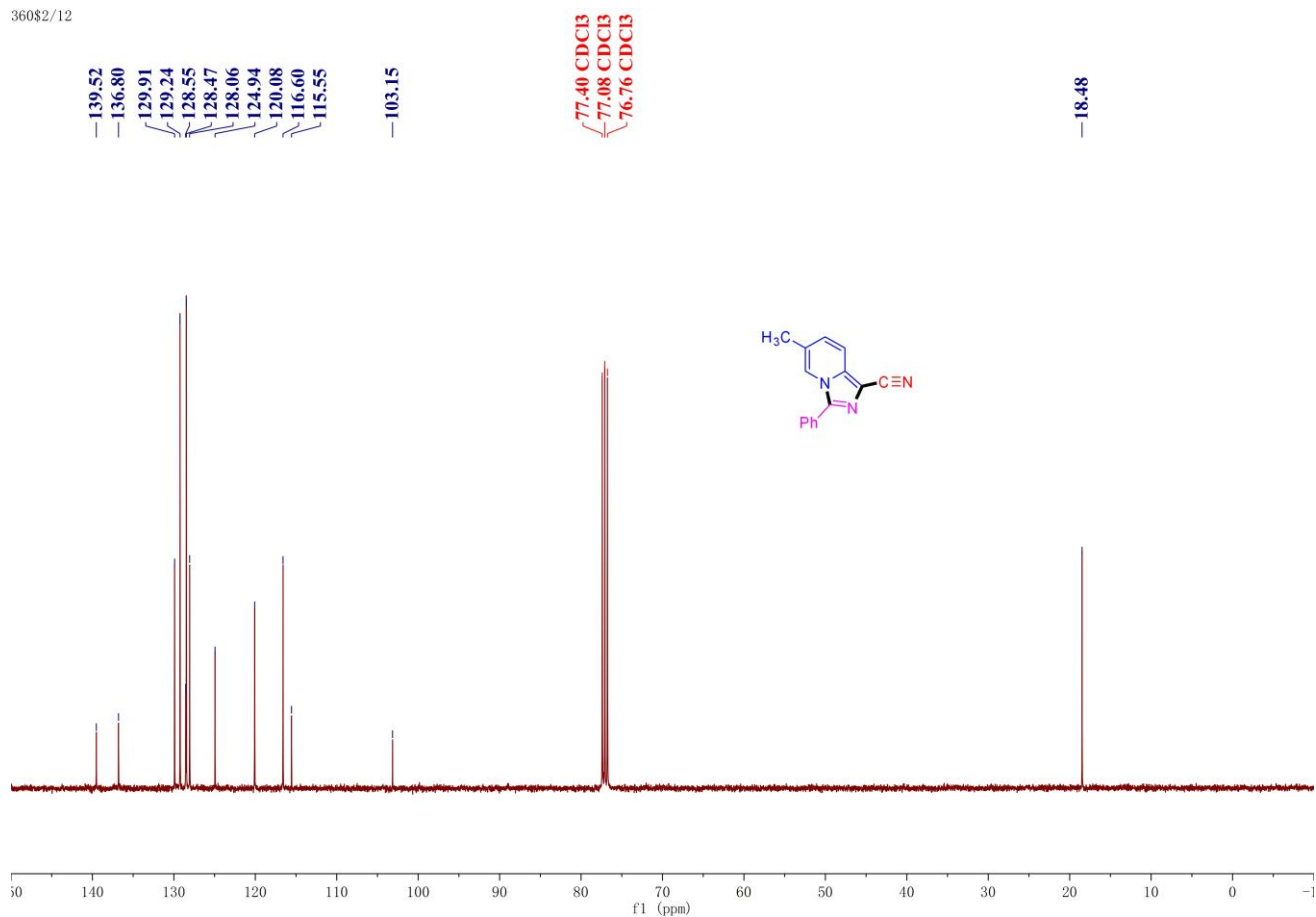

4ja  
360\$9/11

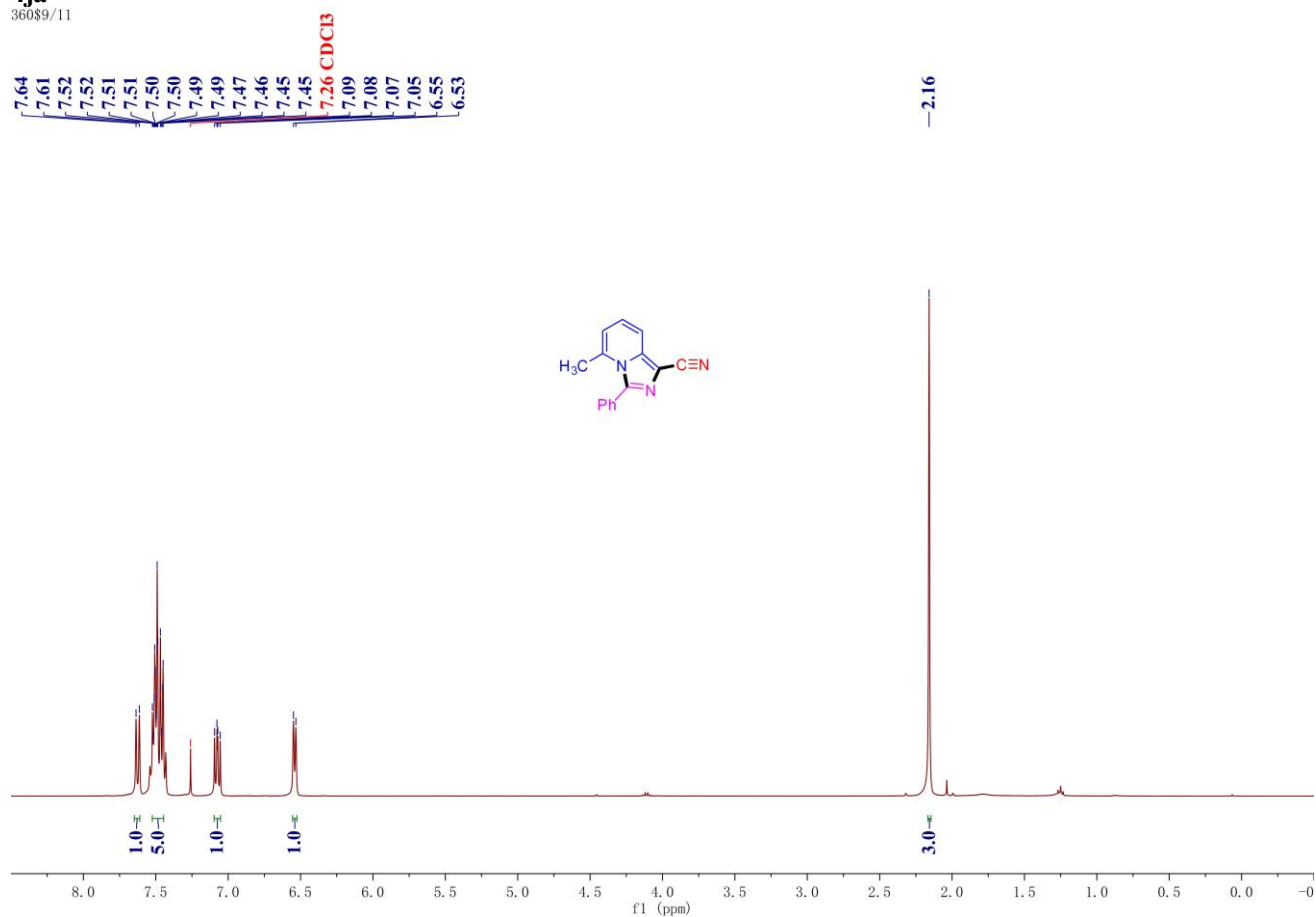

360\$3/4

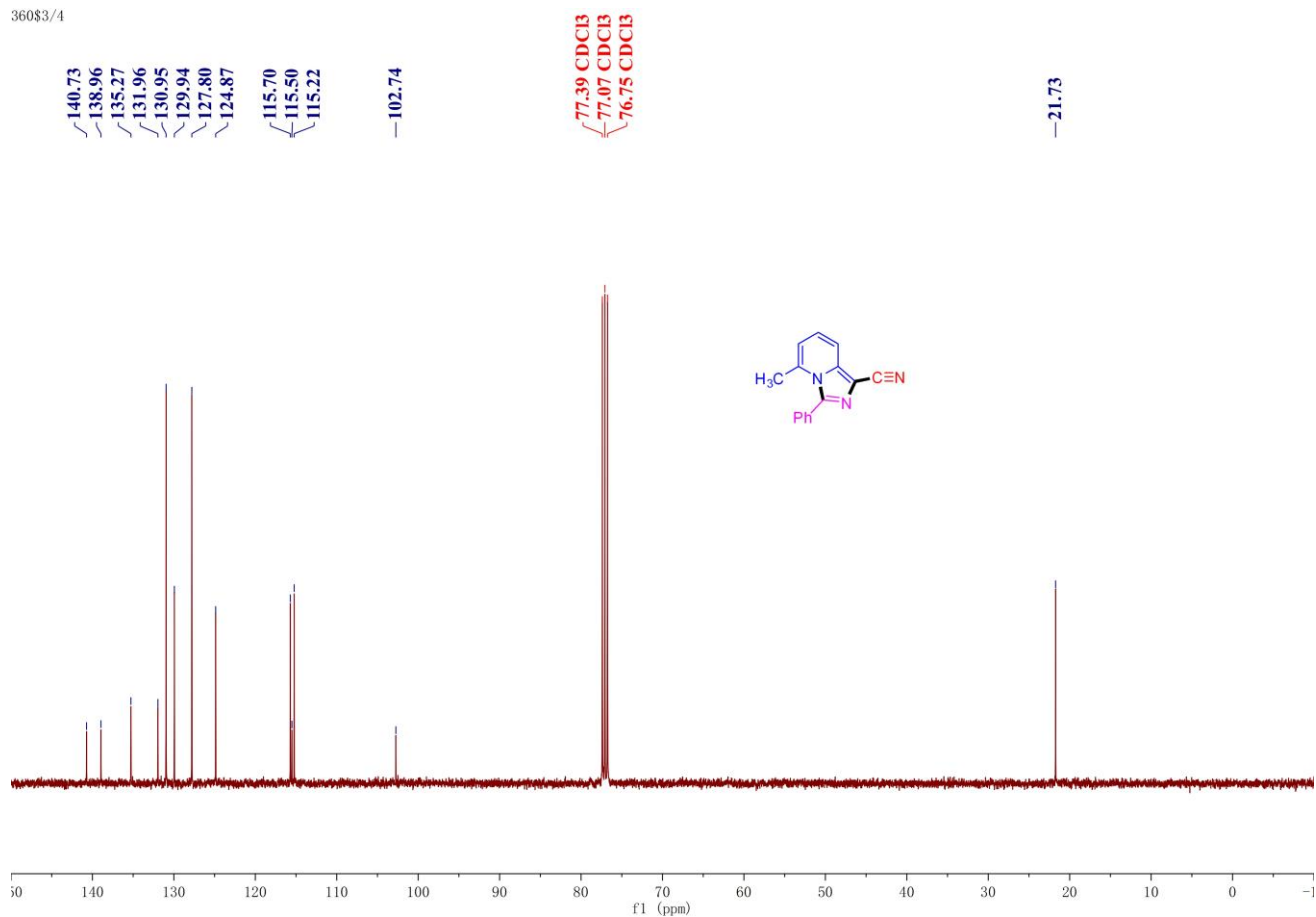



4ka  
360\$15/9

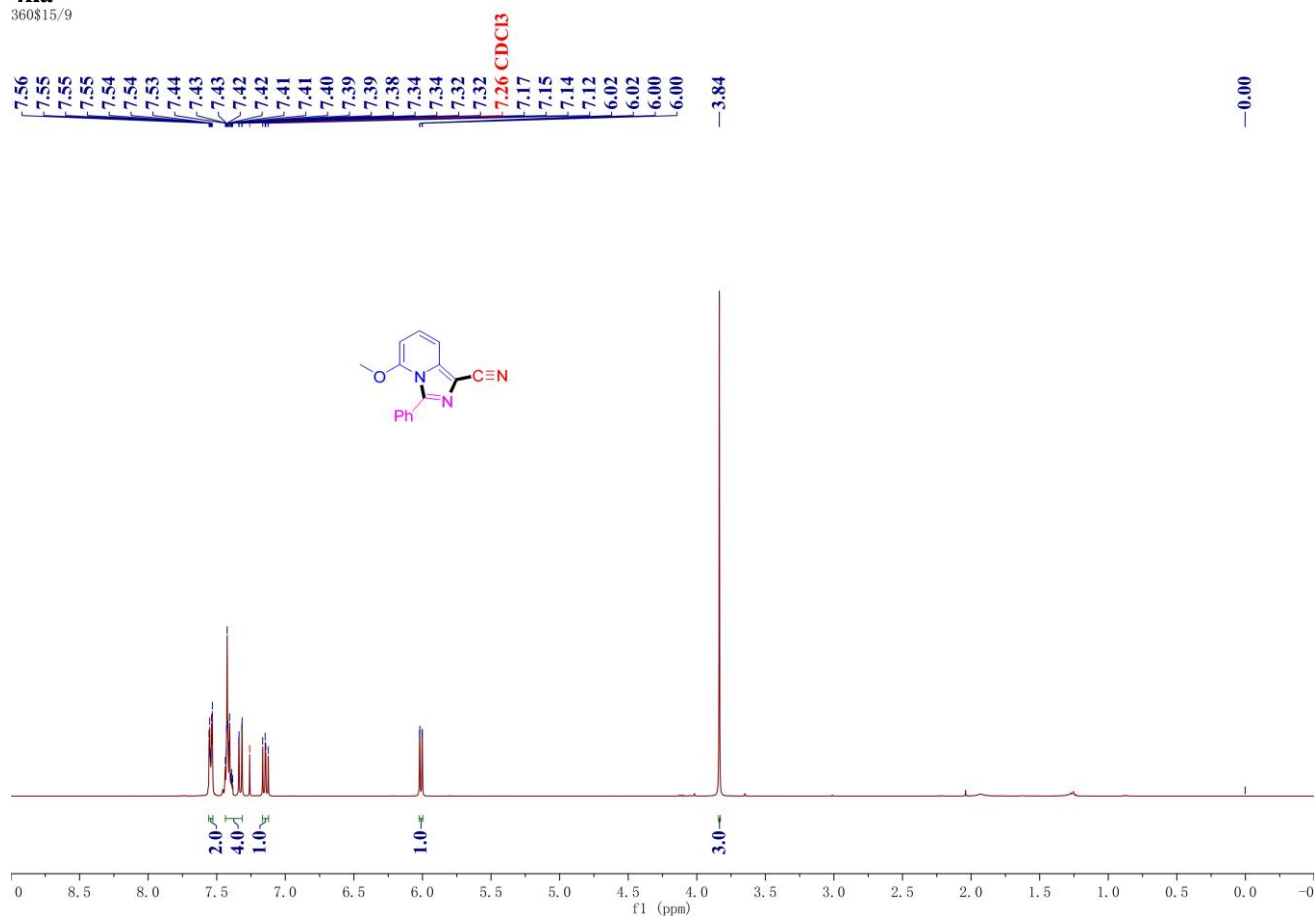

360\$4/6

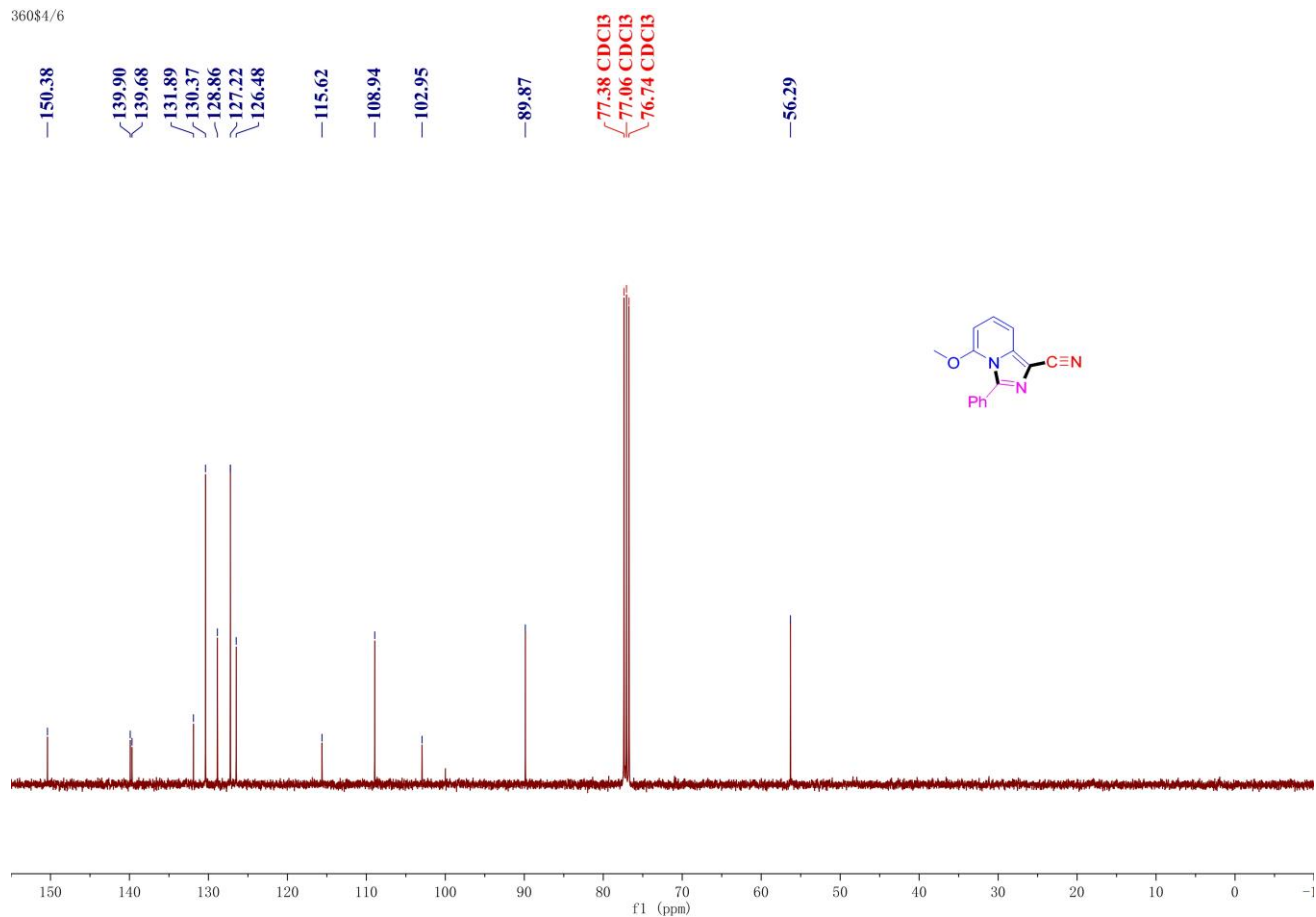

41a

360\$6/25

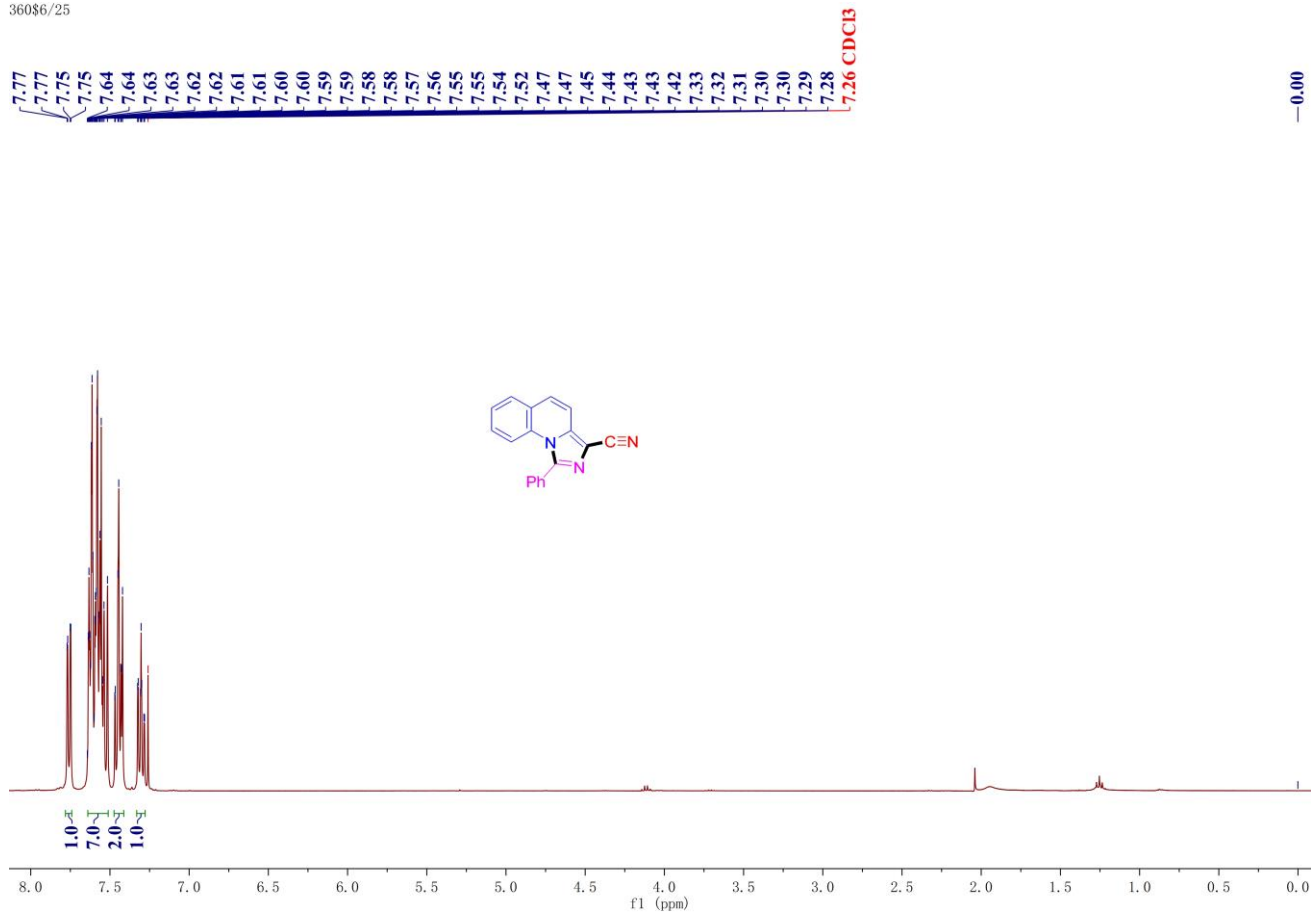

360\$1/26

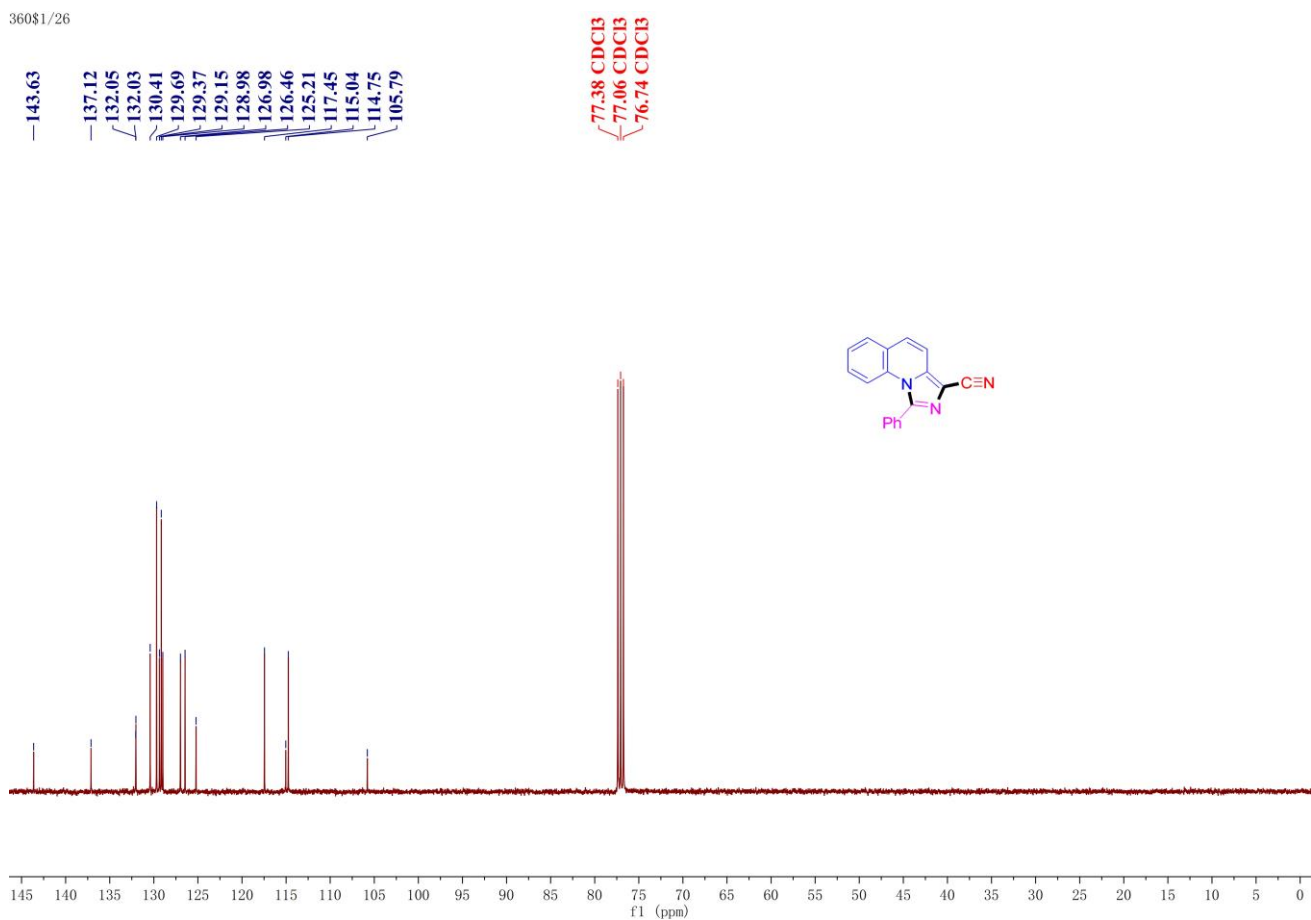

# 4ab

YQ20201025-2/5

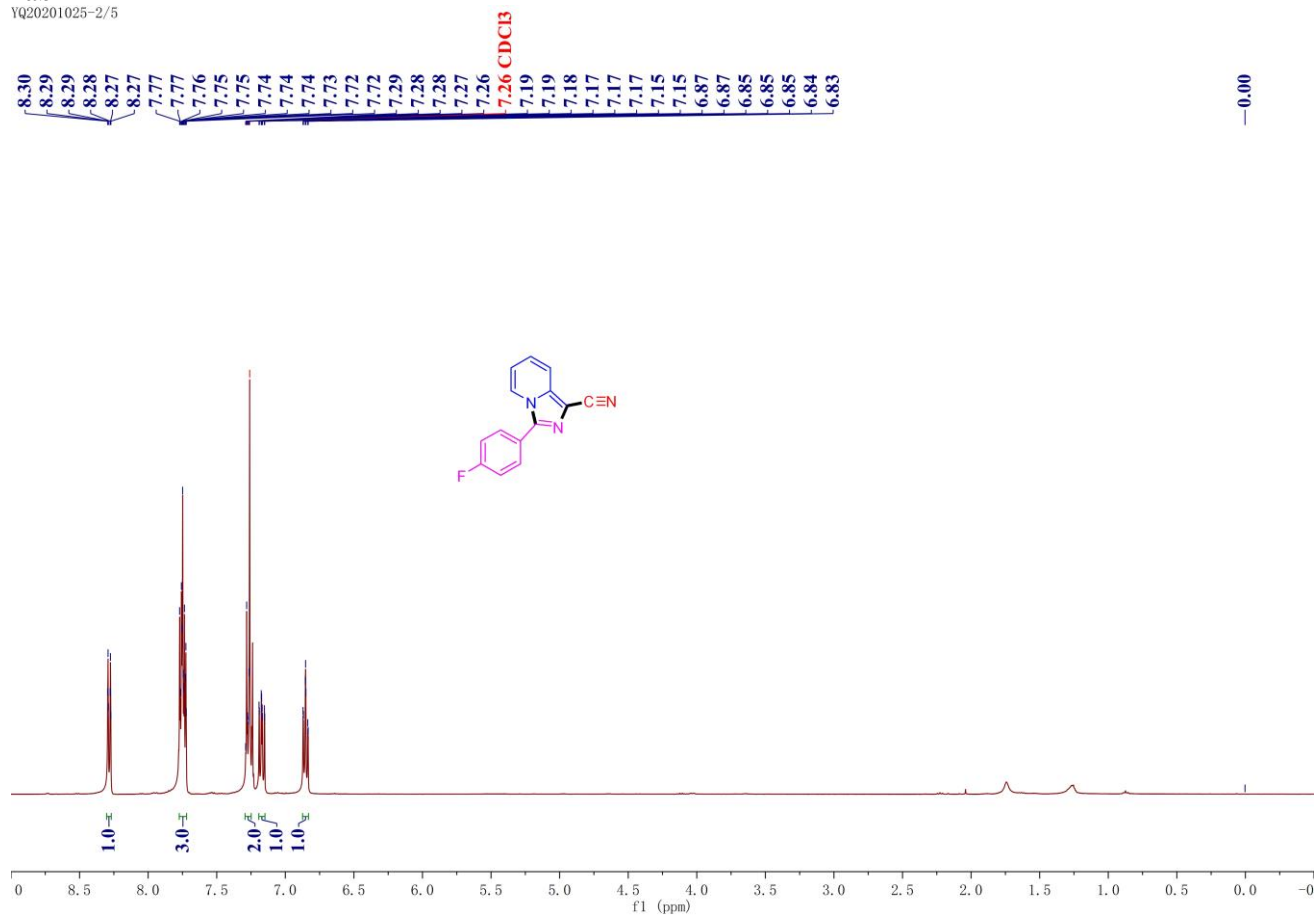

YQ20201025-2/17

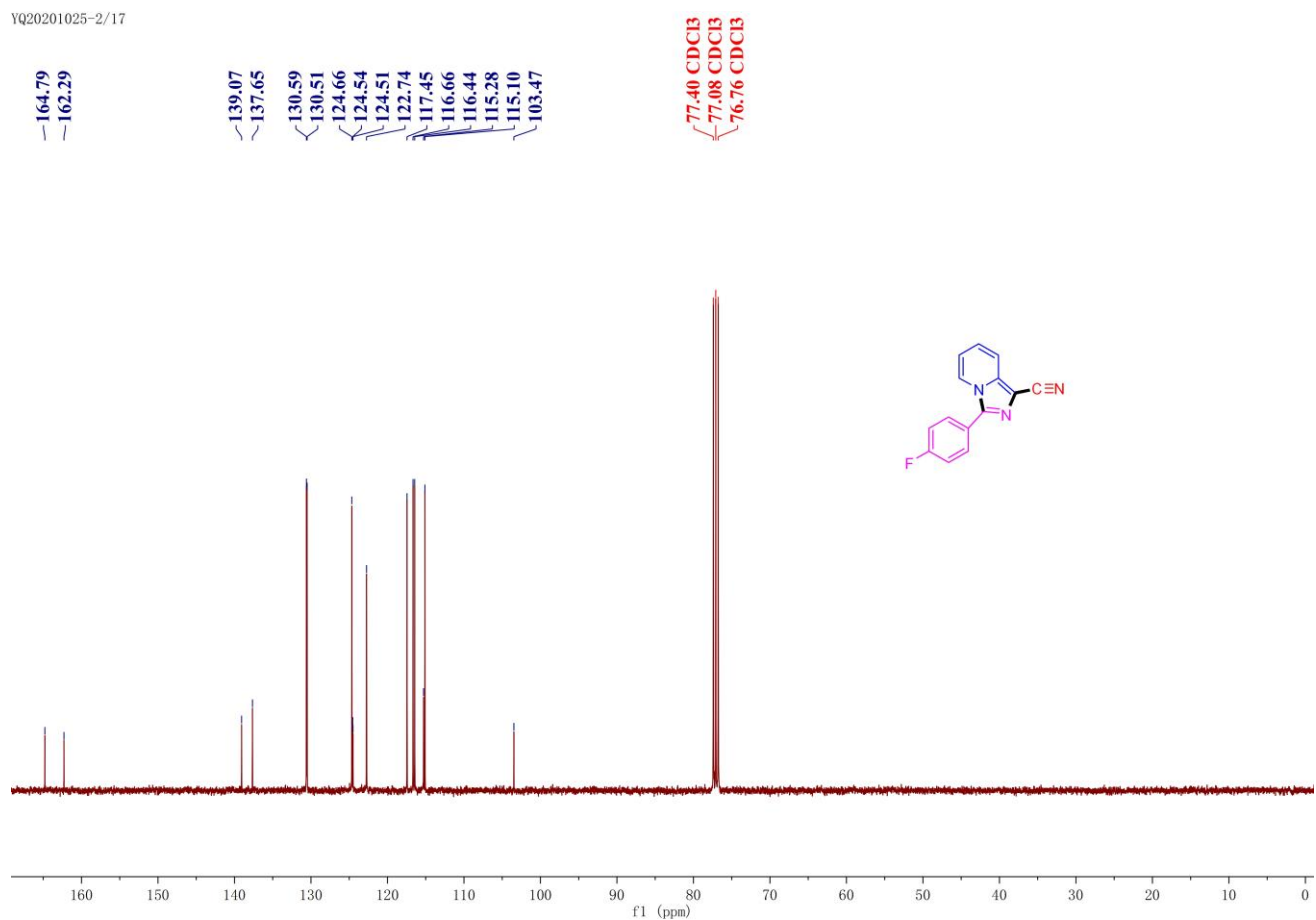

# 4ac

YQ20201102-2/3

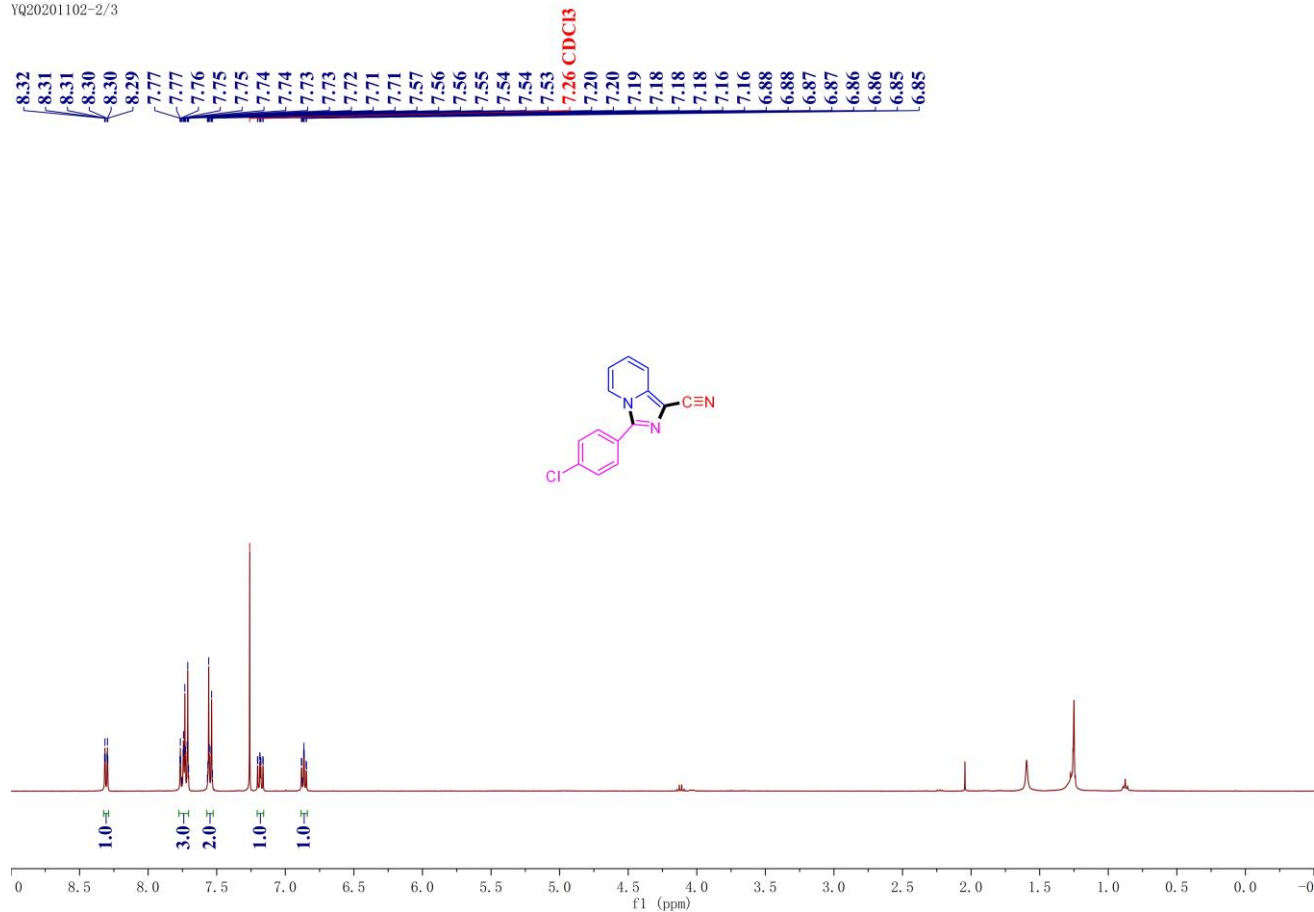

YQ20201102-2/12

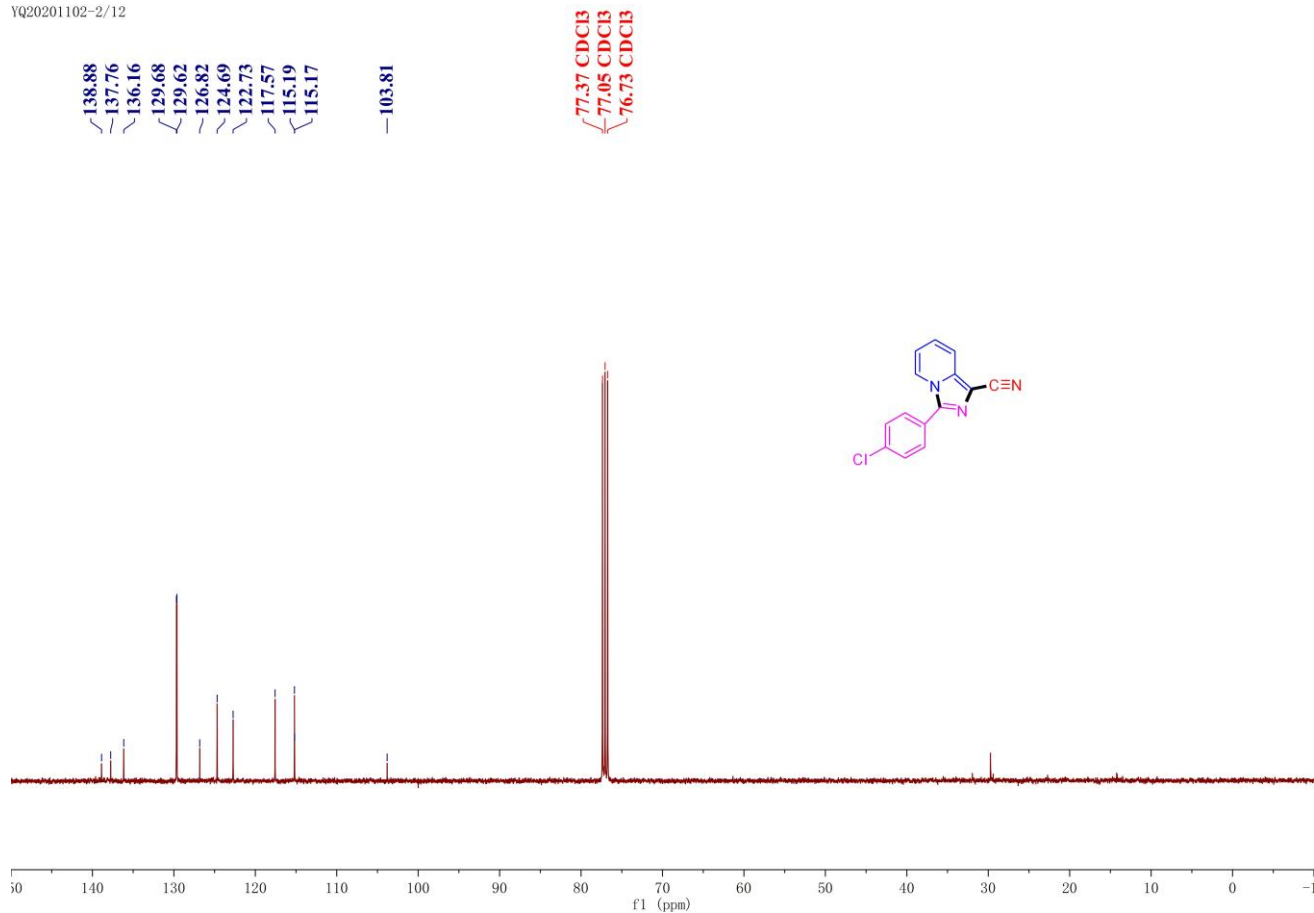

# 4ad

YQ20201025-1/7

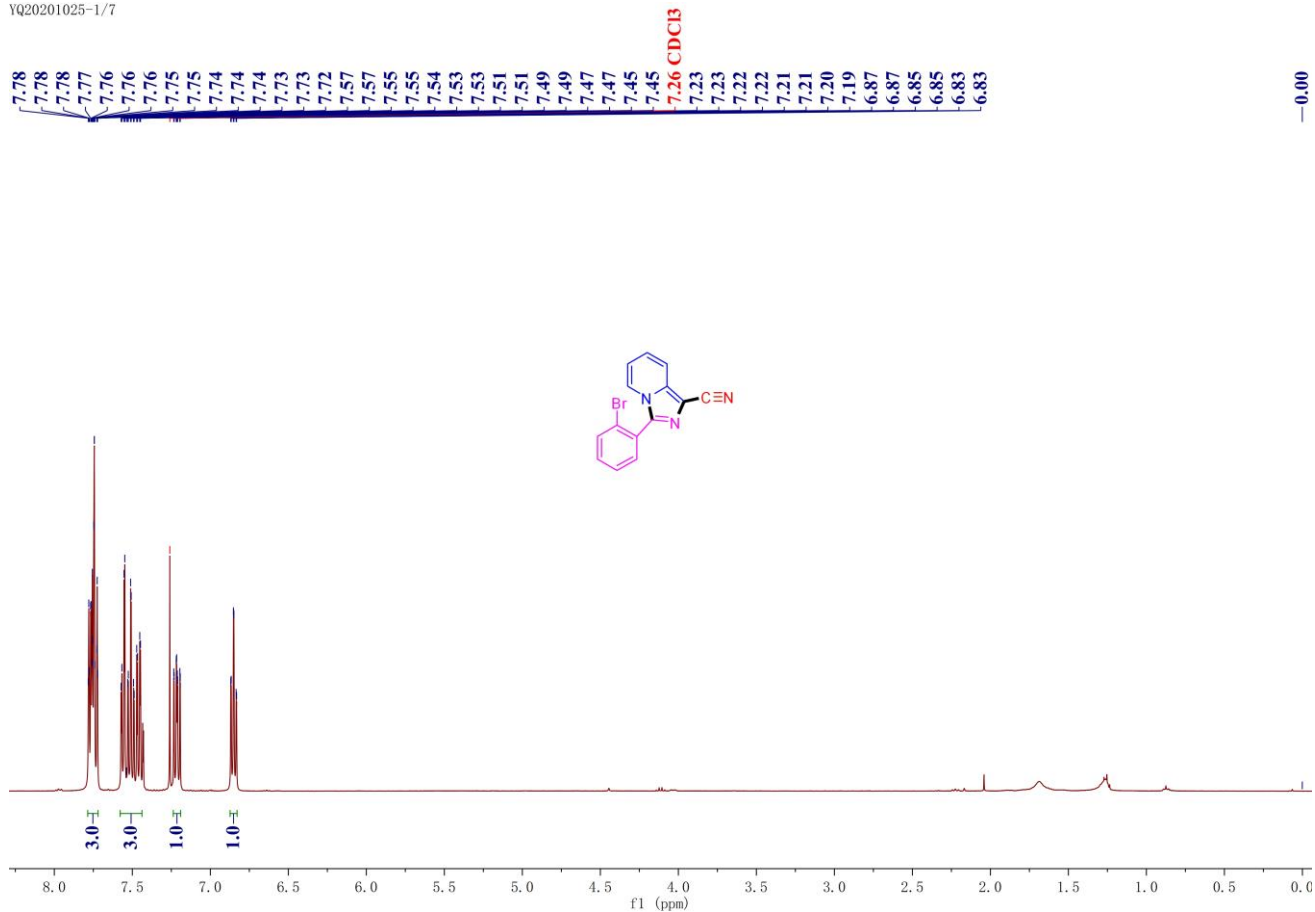

YQ20201025-1/16

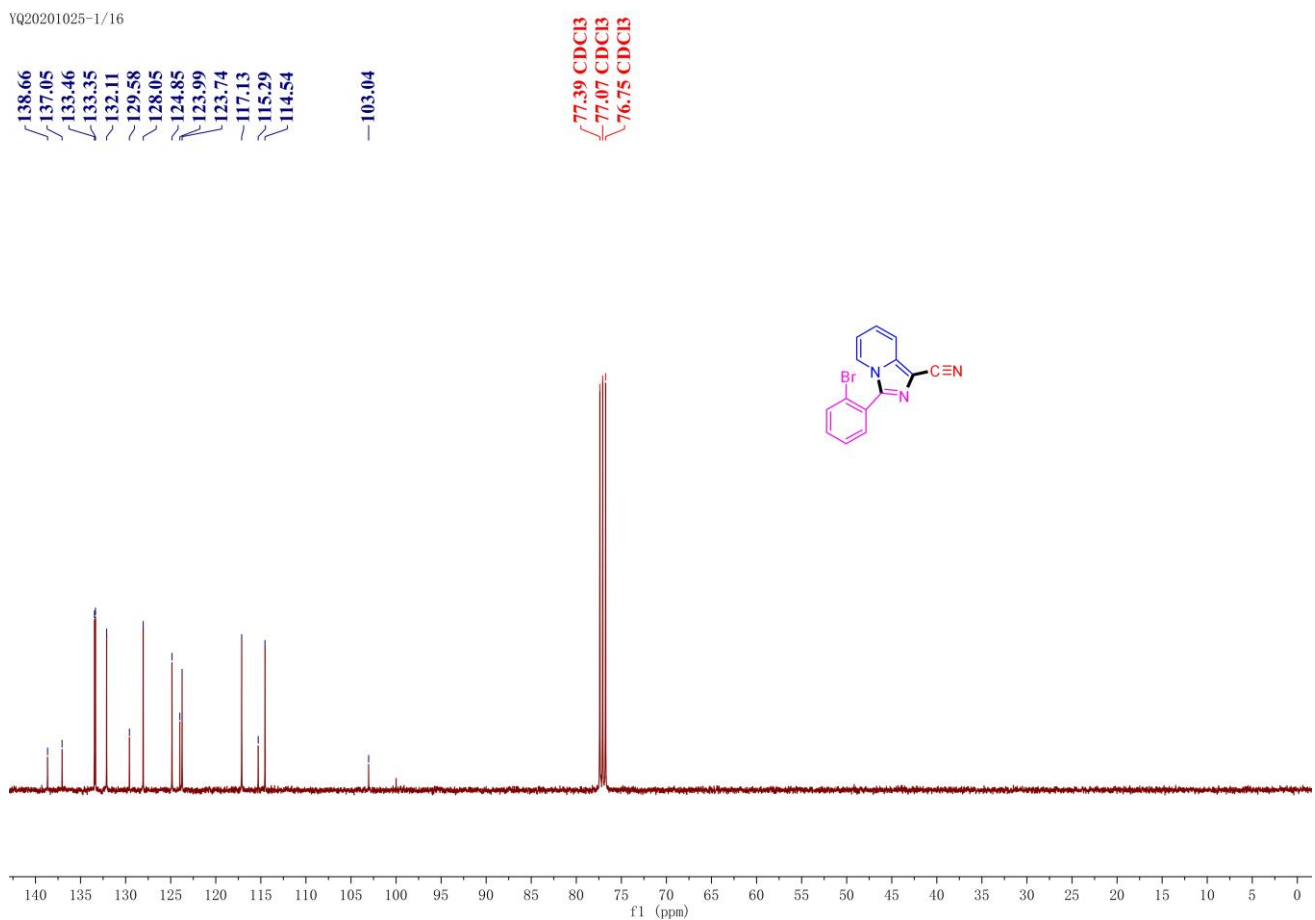

# 4ae

YQ20201028-1/6

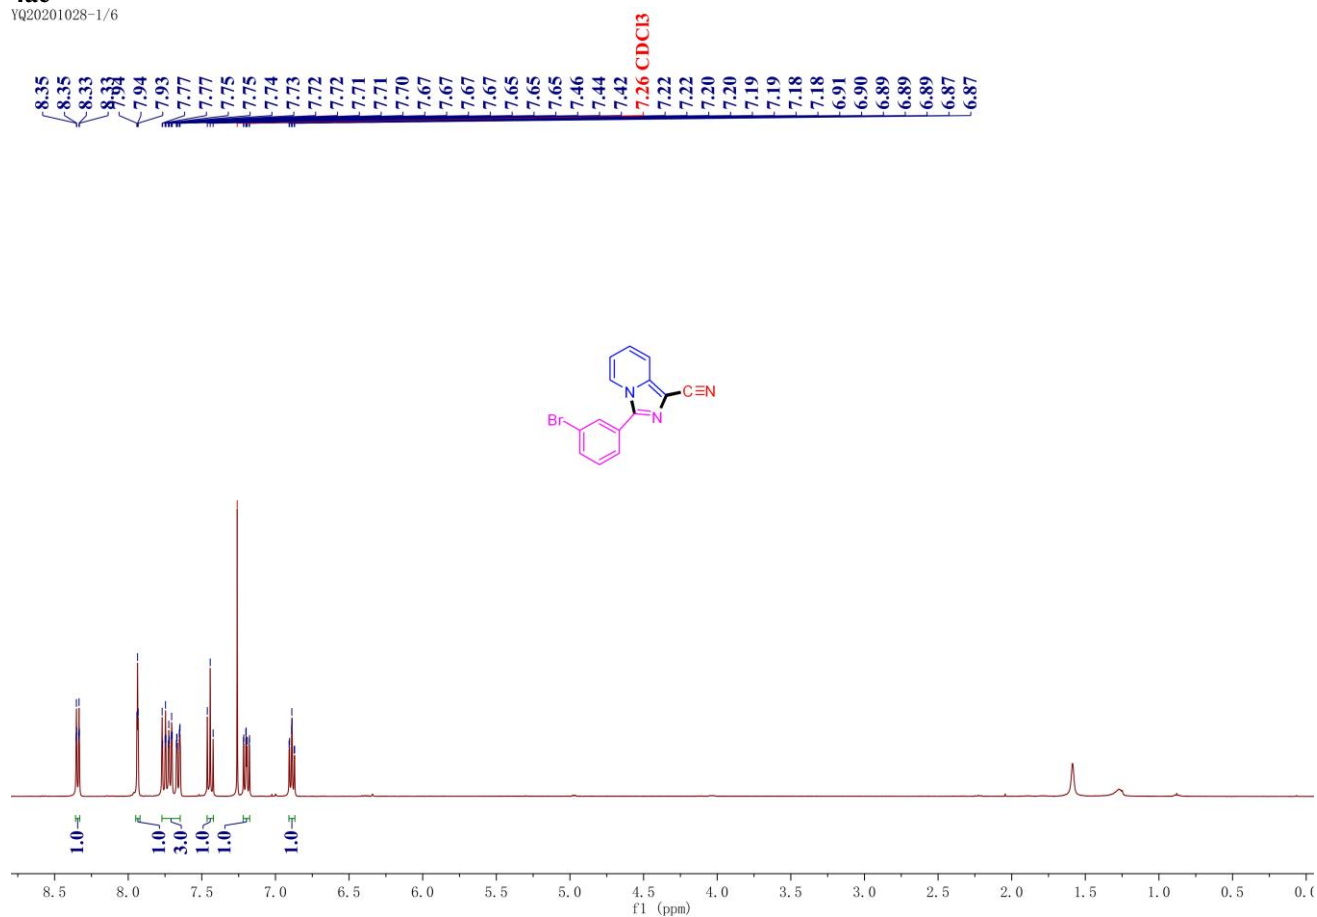

YQ20201028-1/15

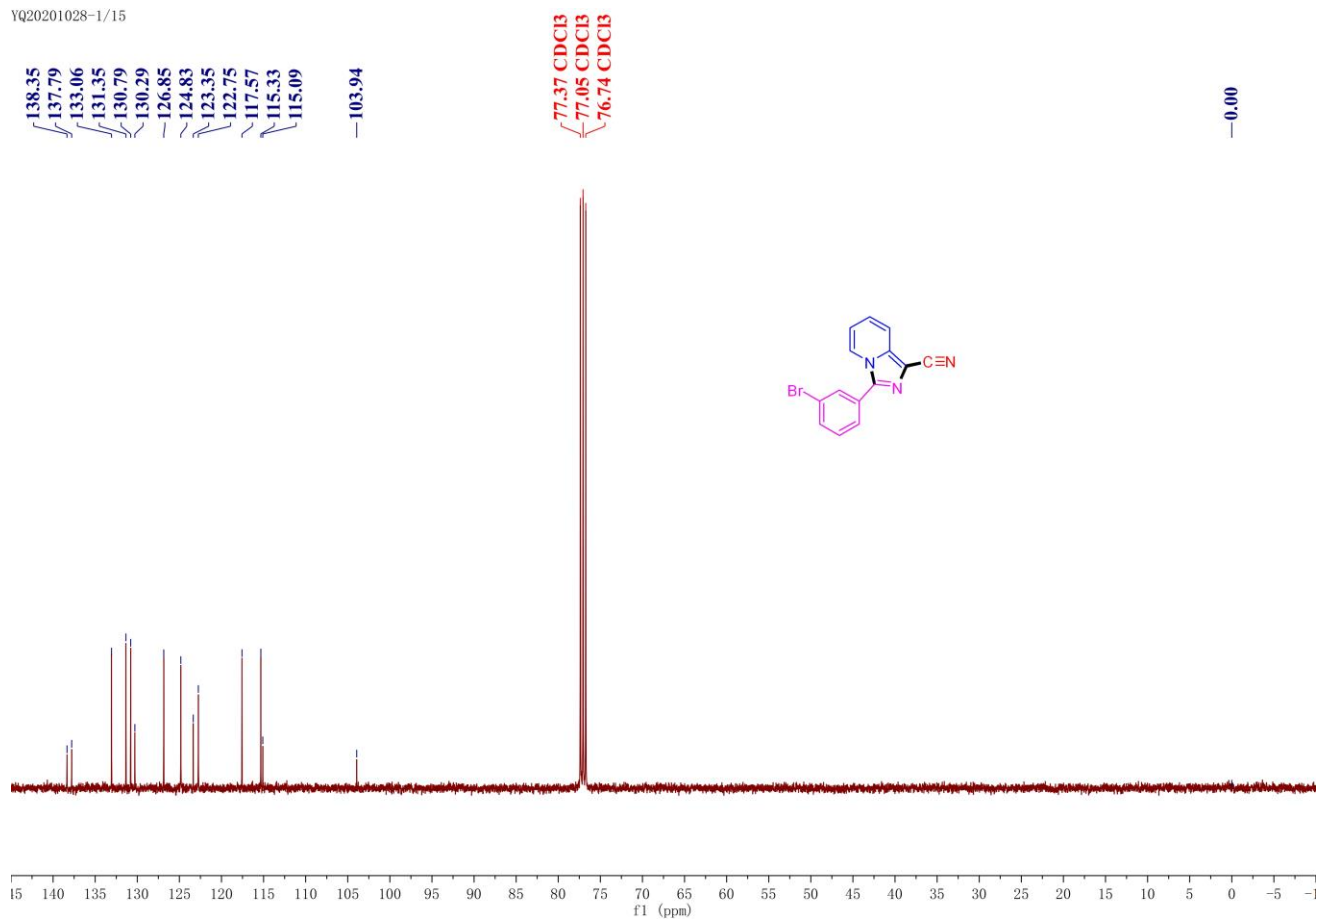

4af  
360\$0/31

8.32  
8.31  
8.31  
8.30  
8.30  
8.29  
7.75  
7.75  
7.74  
7.73  
7.72  
7.72  
7.71  
7.71  
7.70  
7.69  
7.68  
7.68  
7.66  
7.66  
7.65  
7.65  
7.64  
7.63  
7.26 CDCl3  
7.20  
7.18  
7.18  
7.18  
7.16  
7.16  
6.88  
6.88  
6.87  
6.86  
6.85  
6.85

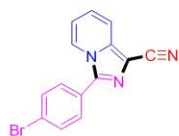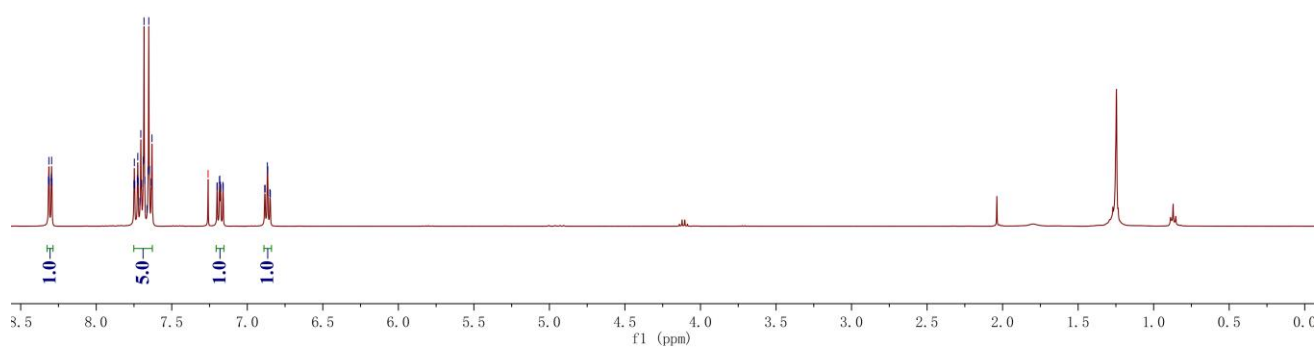

360\$1/32

138.90  
137.77  
132.56  
129.86  
127.29  
124.69  
124.39  
122.72  
117.57  
115.22  
115.13  
103.88  
77.37 CDCl3  
77.05 CDCl3  
76.73 CDCl3

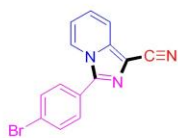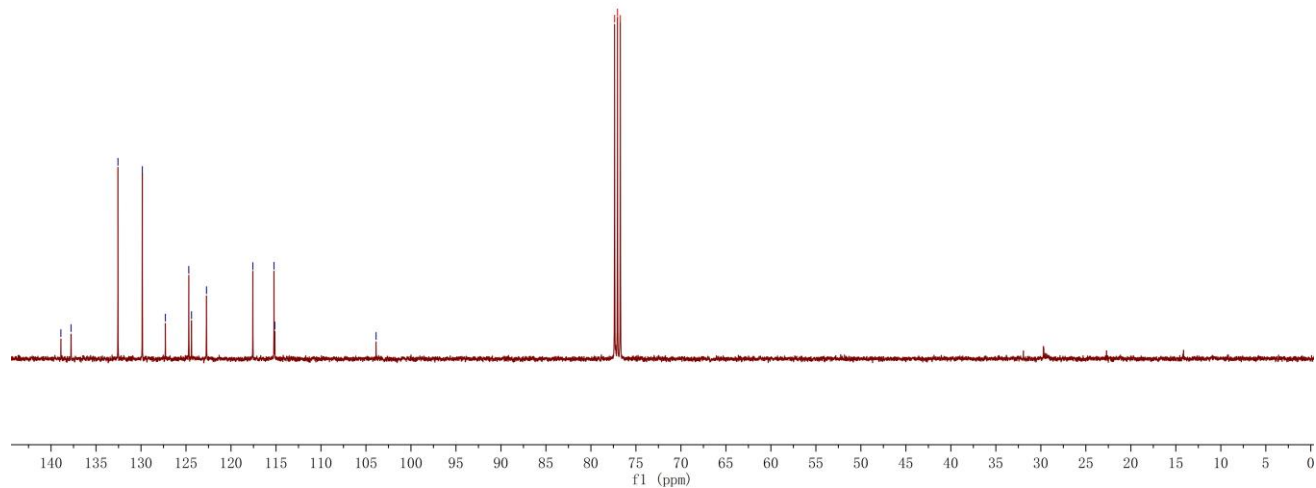

4ag

YQ20201103-1/4

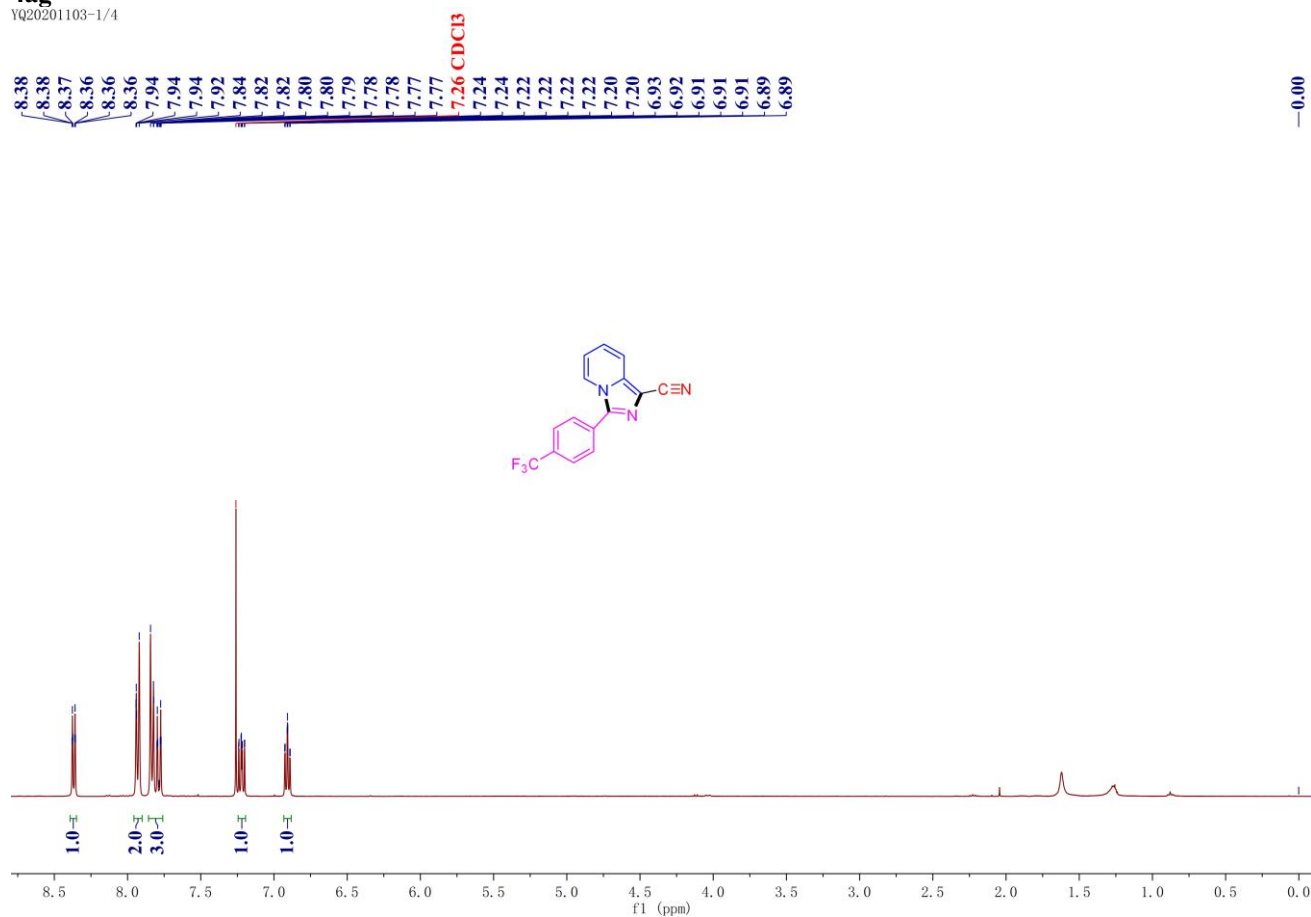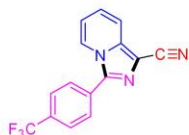

YQ20201103-1/13

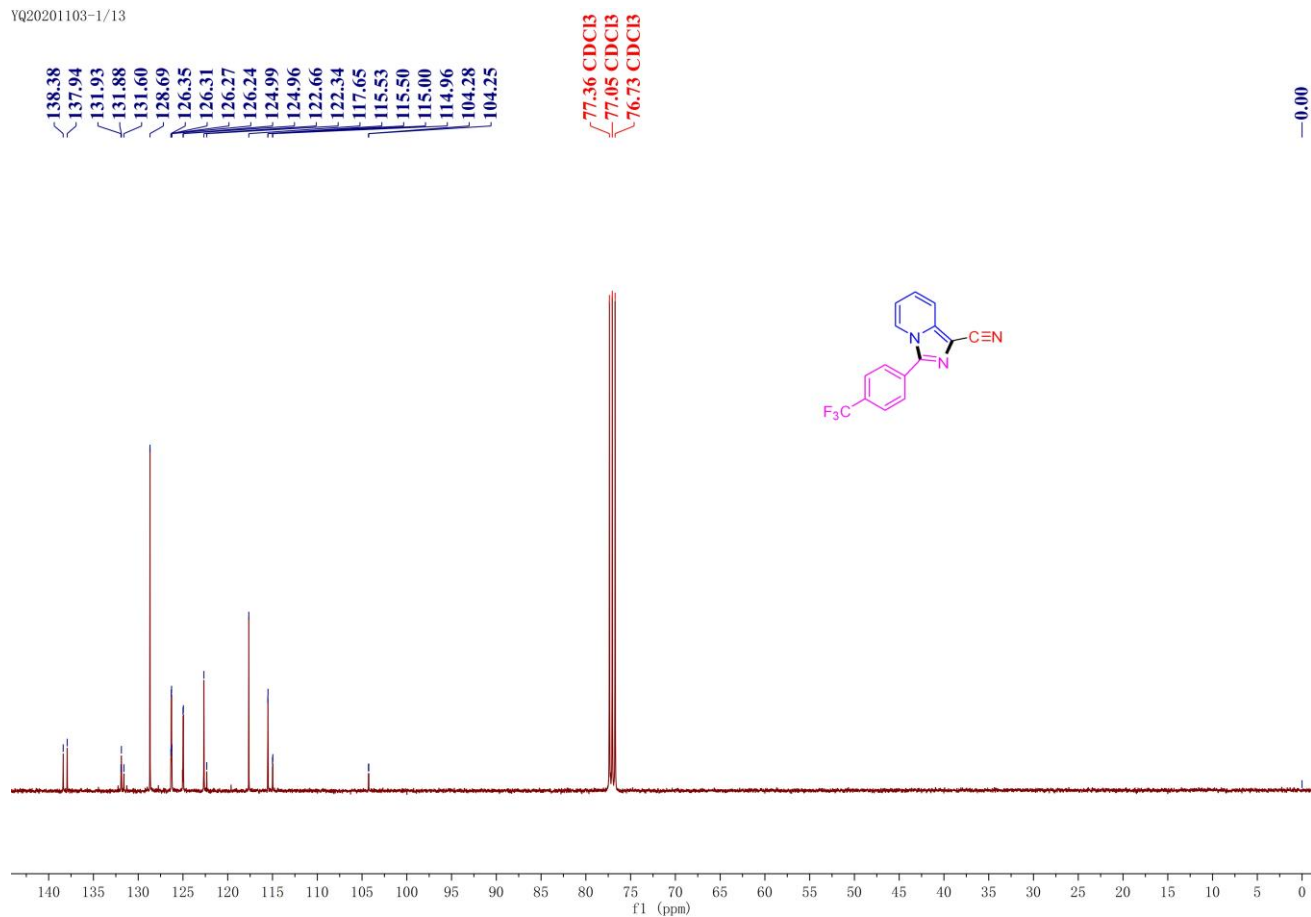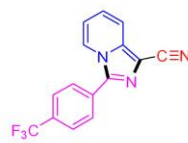



4ah

冯20210110测试/YQ20201123

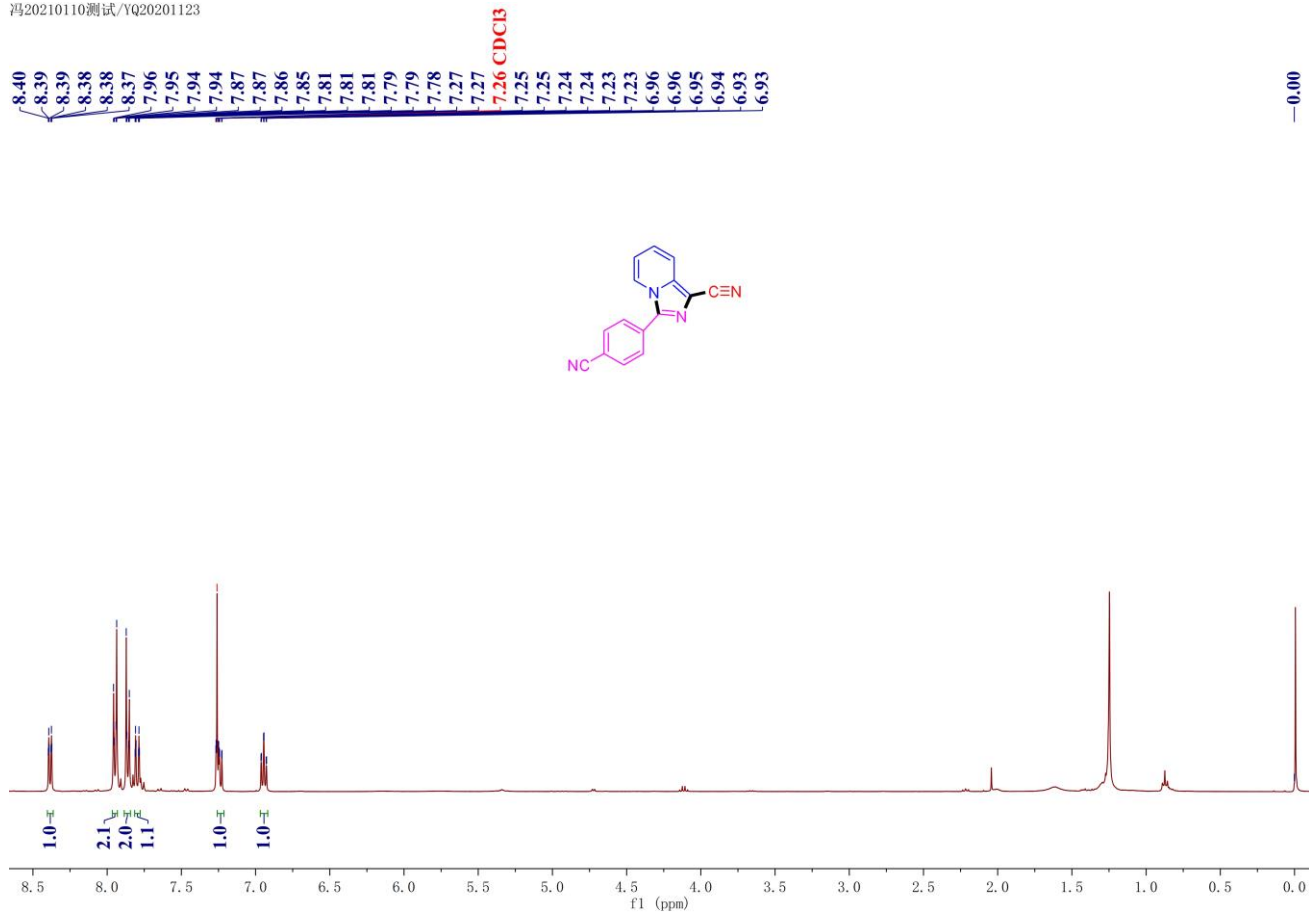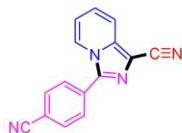

360\$2/34

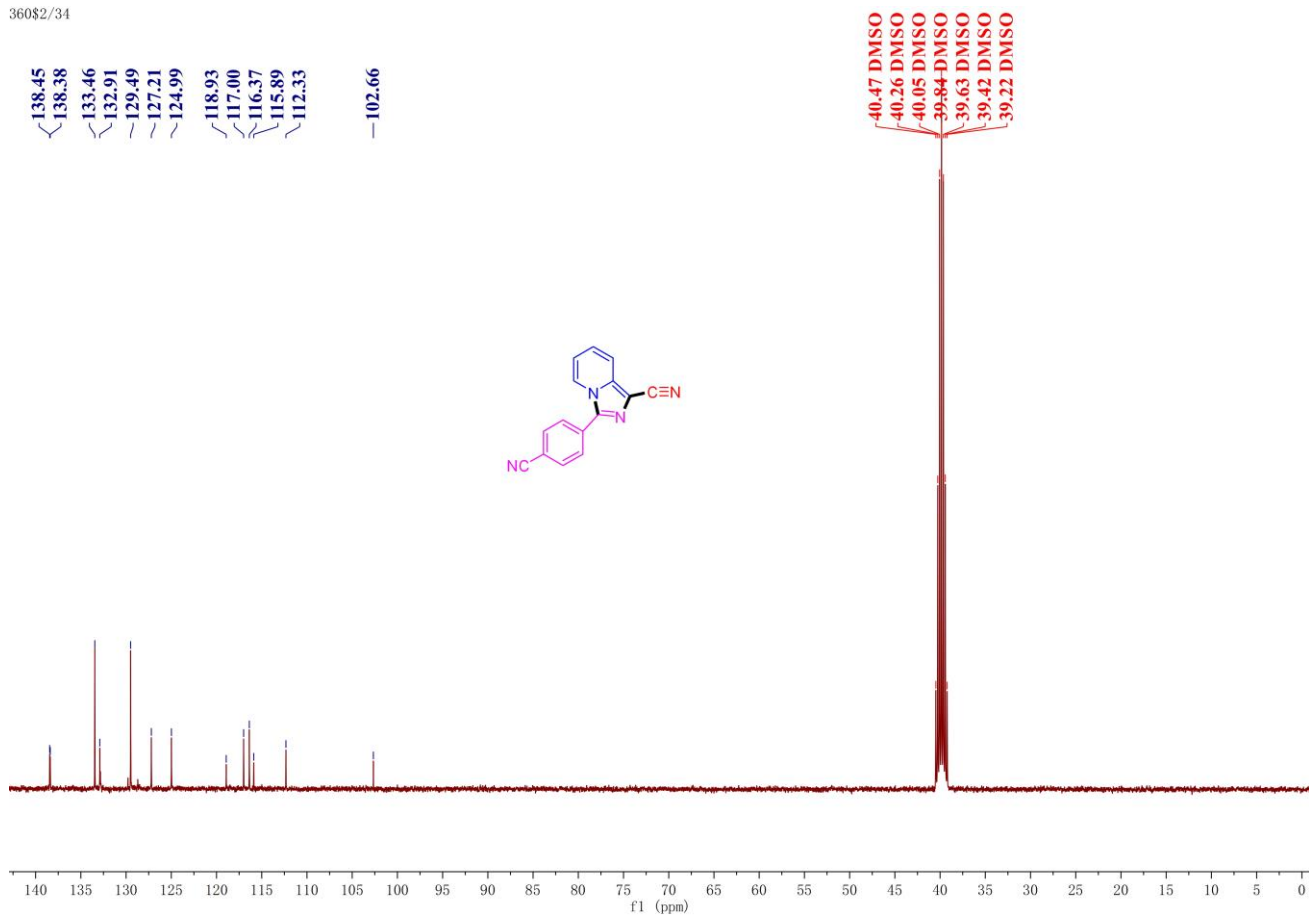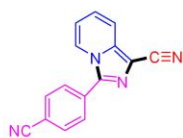

4ai

YQ20201028-2/8

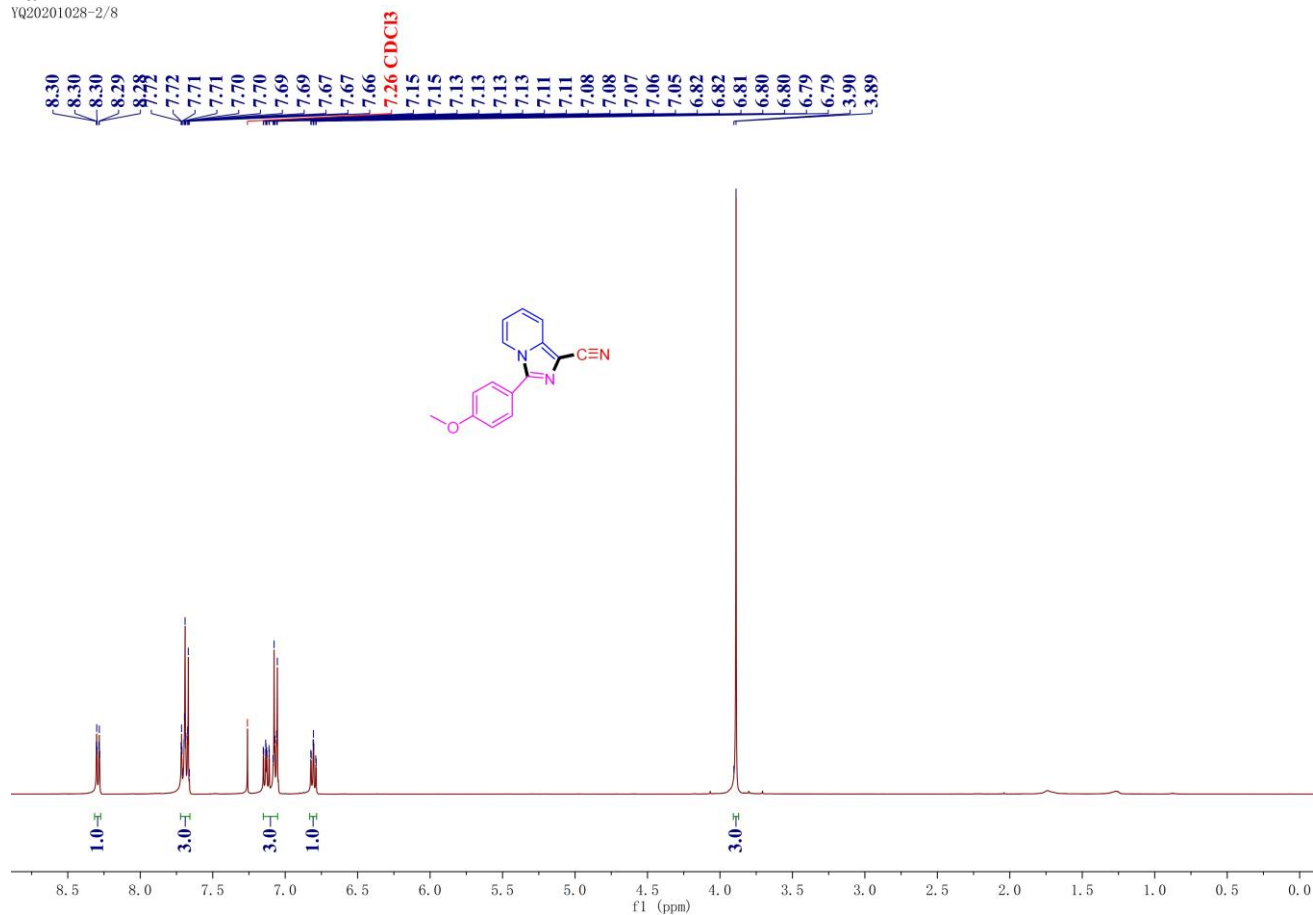

YQ20201028-2/14

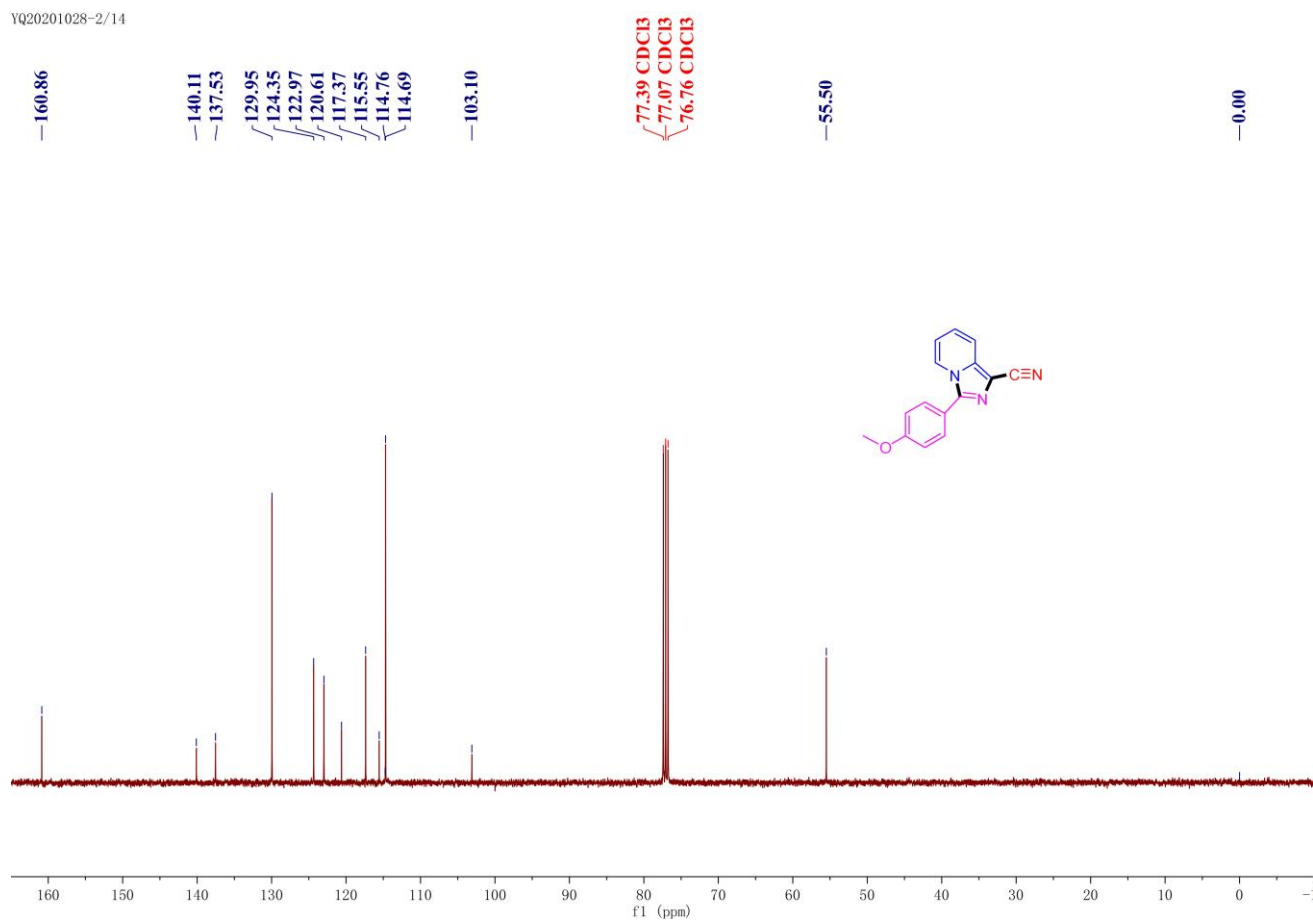

# 4aj

冯20210110测试/YQ20201217-3

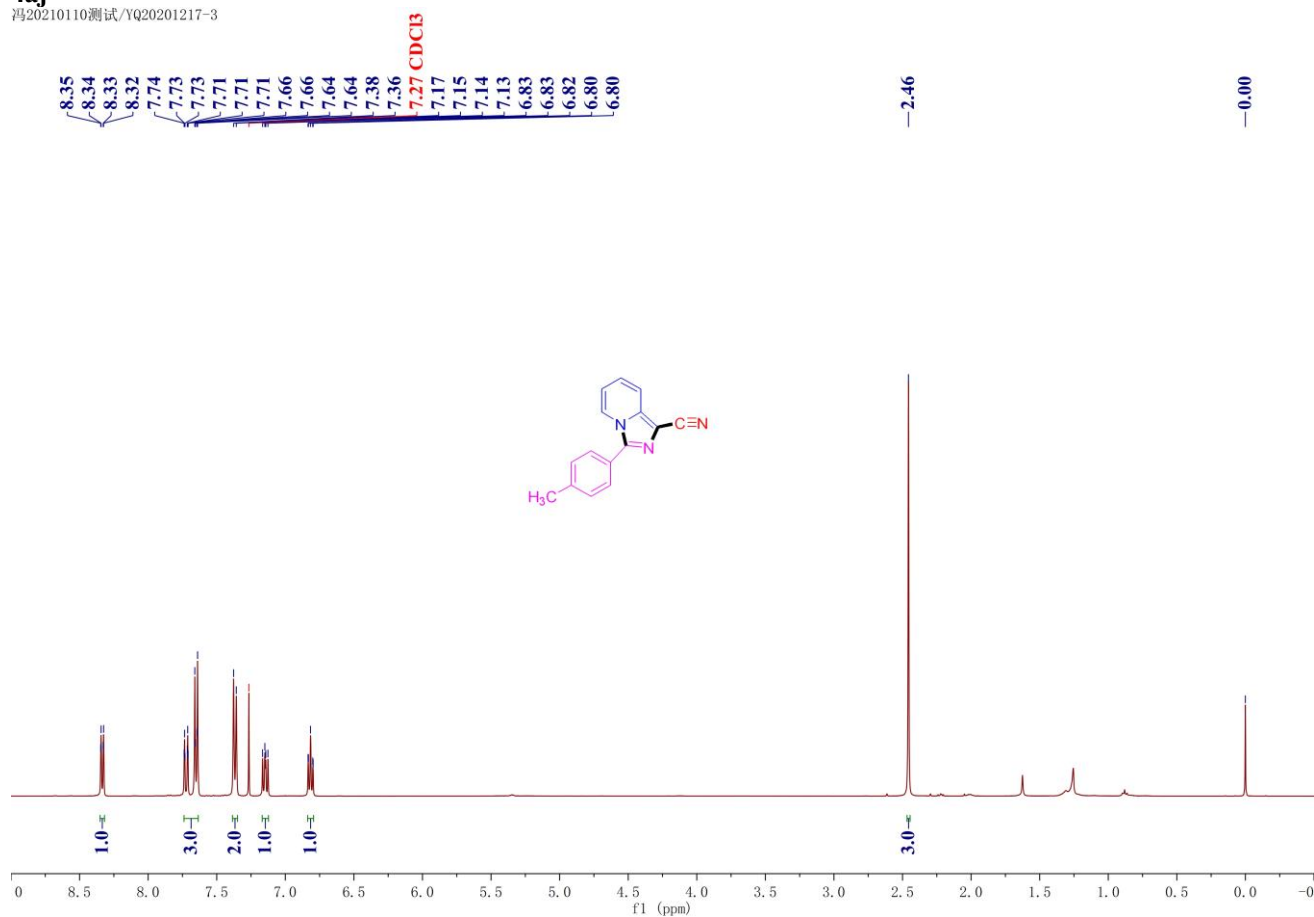

YQ20201217-3/13

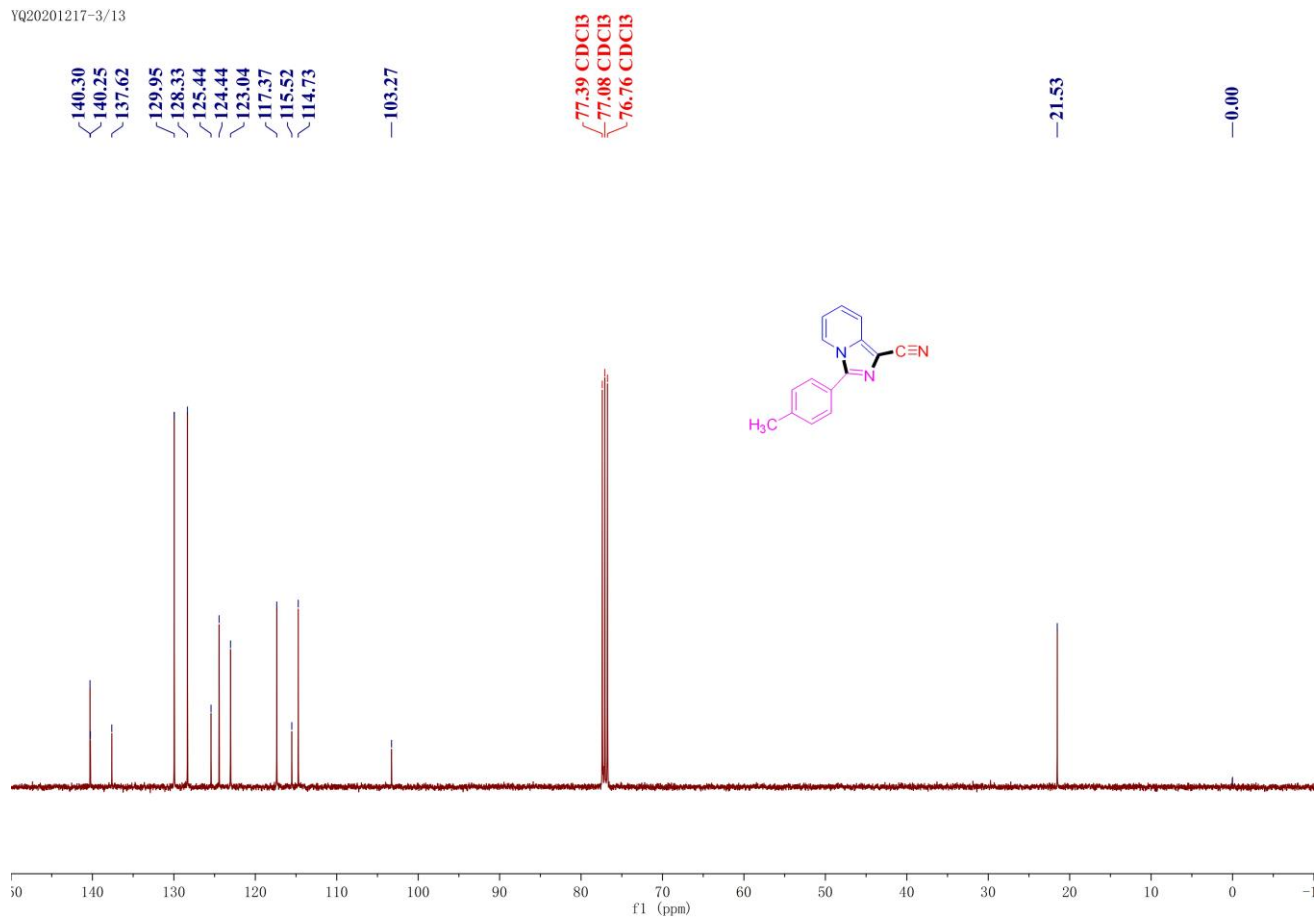

4ak

冯20210110测试/YQ20201216-2

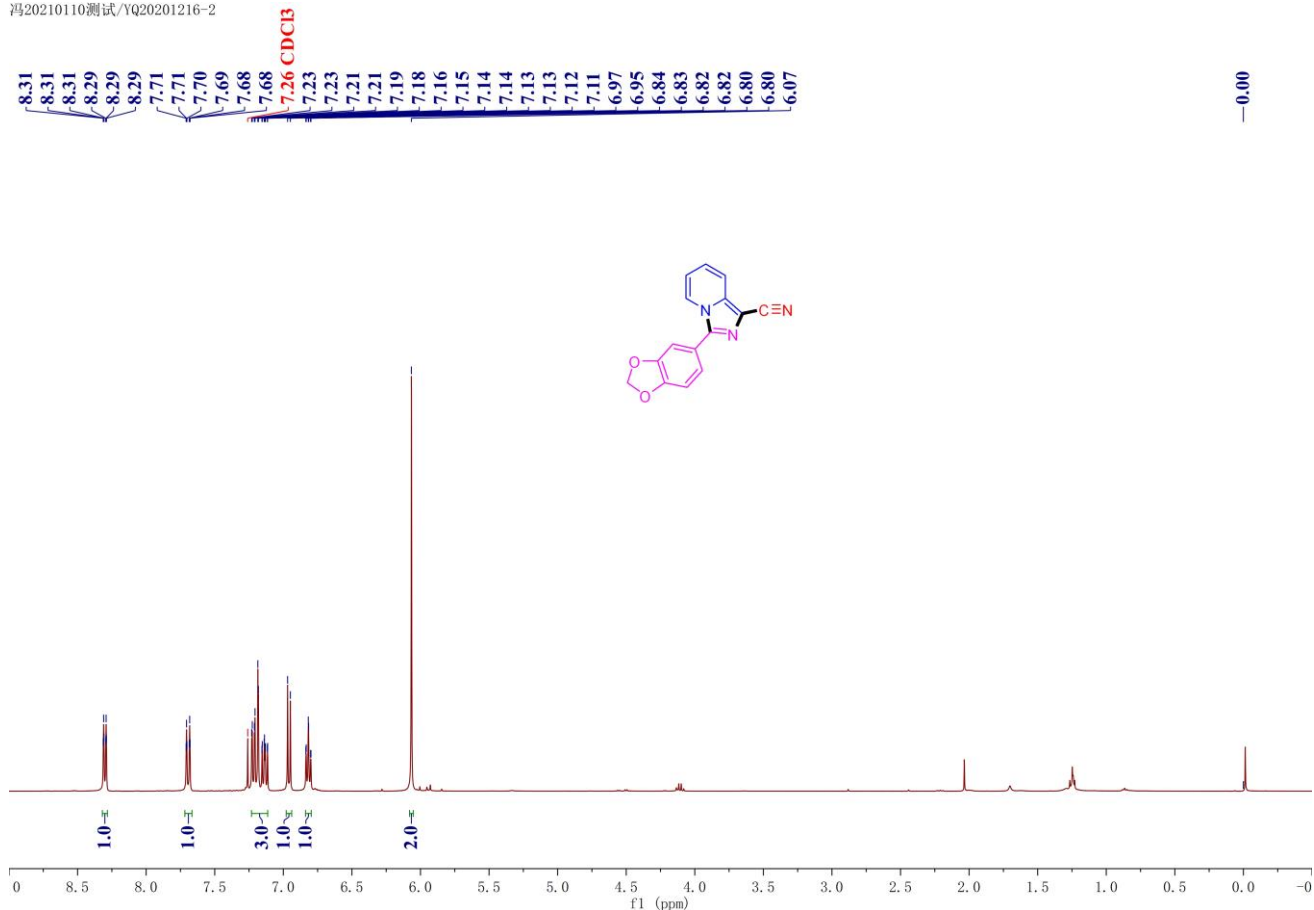

YQ20201216-2/14

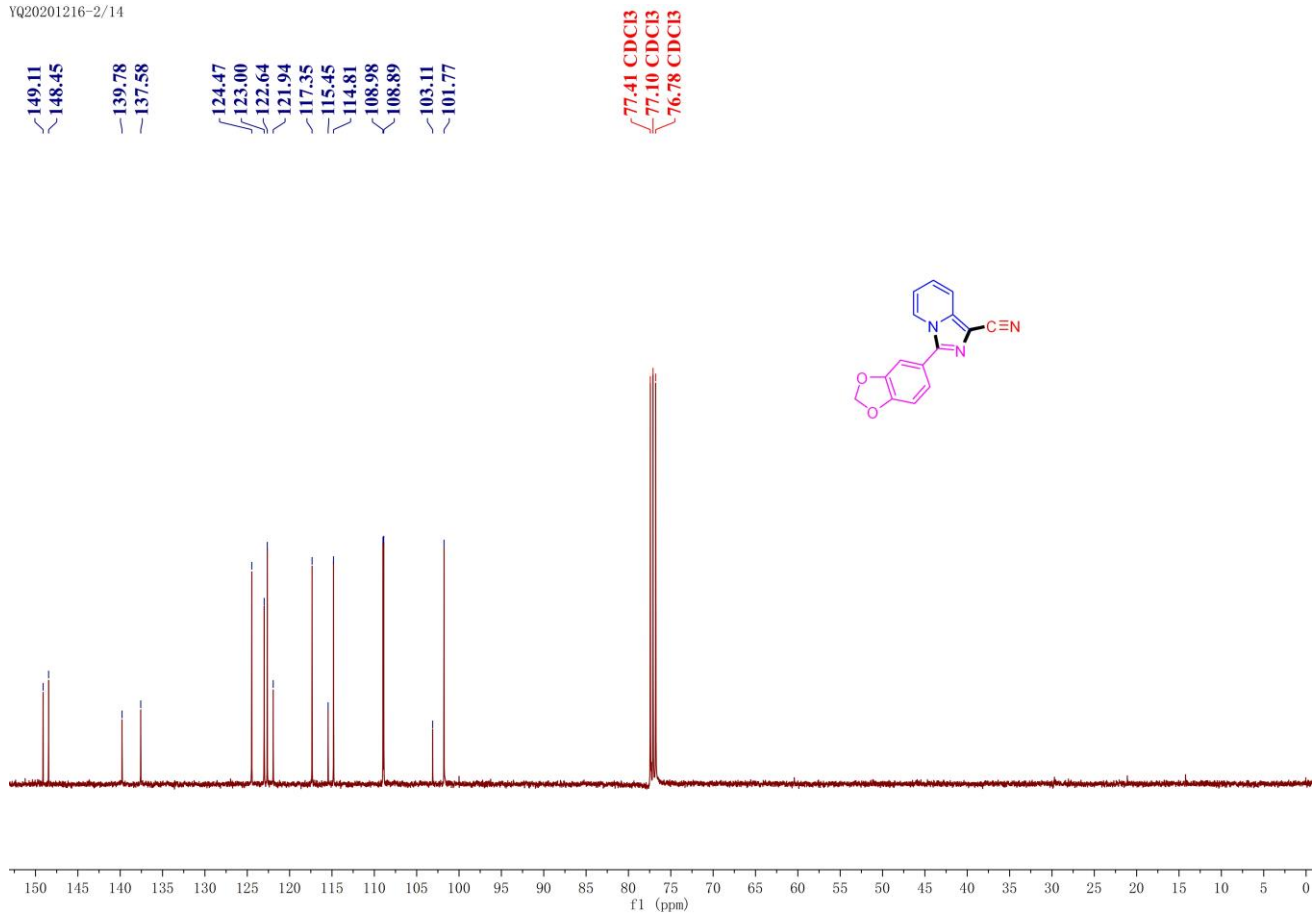

4al

冯20210110测试/YQ20201224-1

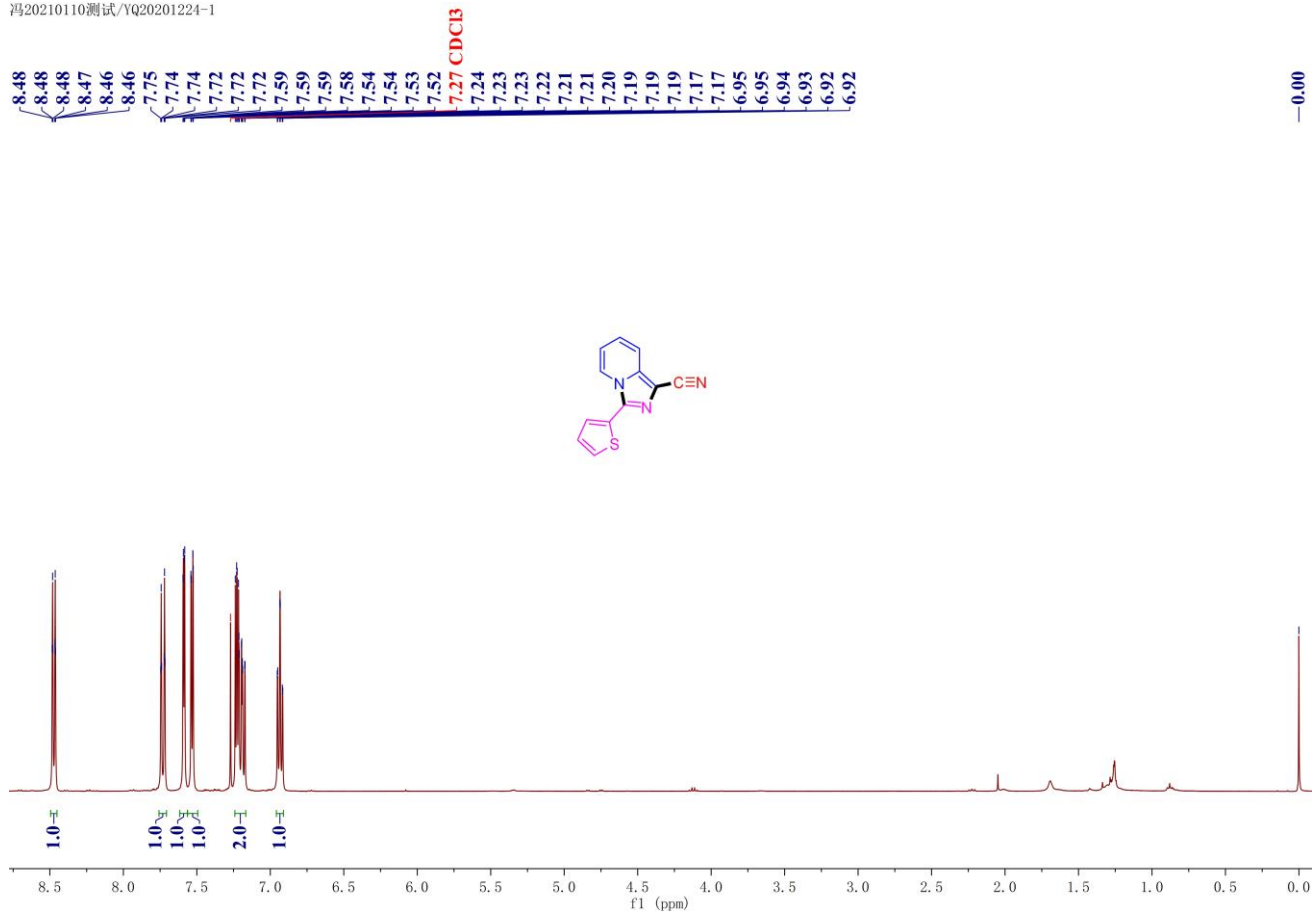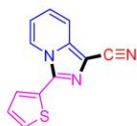

YQ20201224-1/21

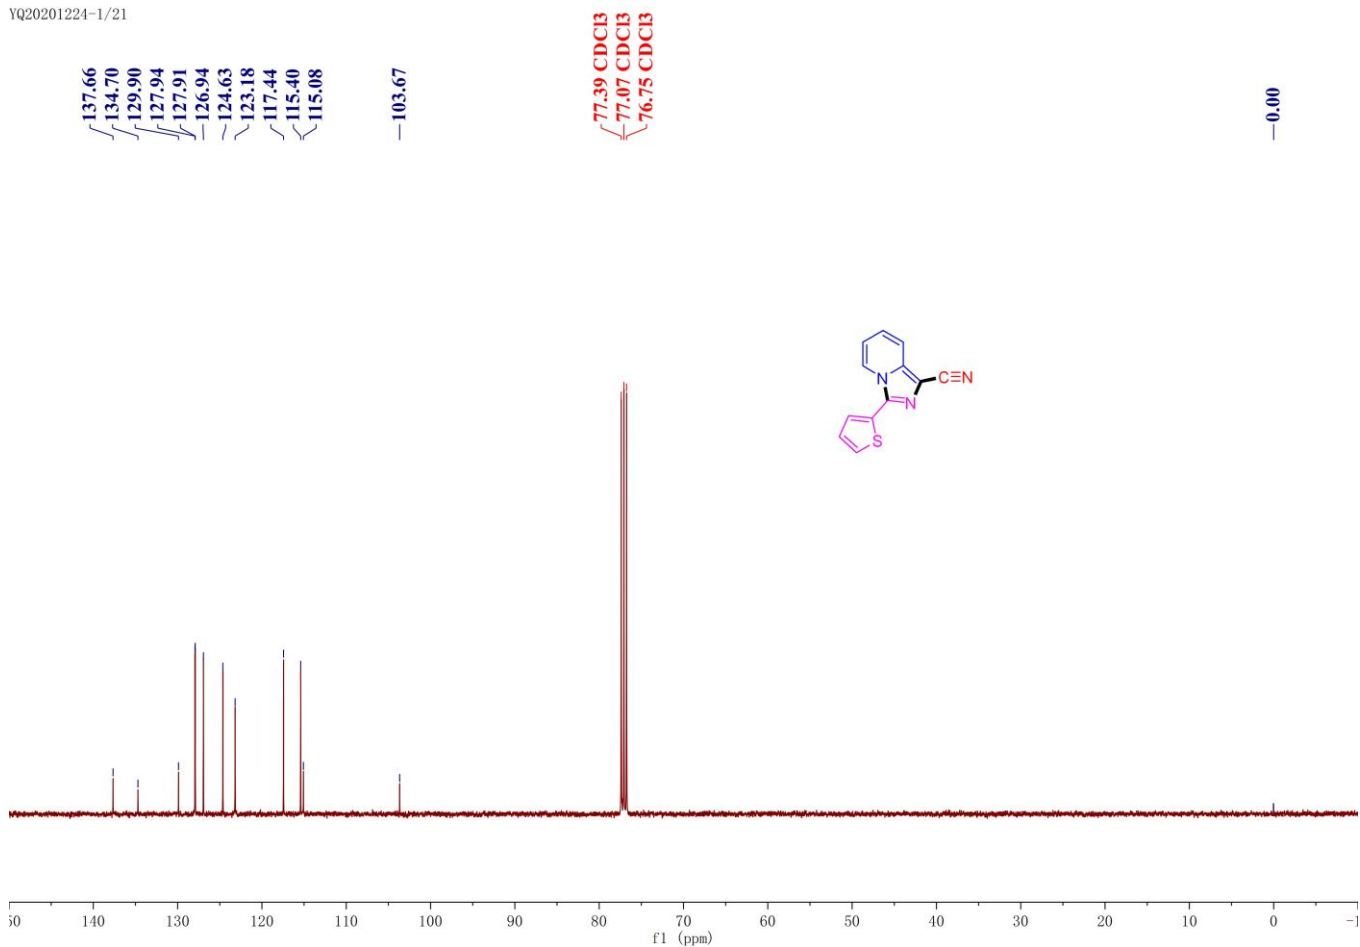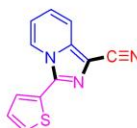

4am

360\$9/14

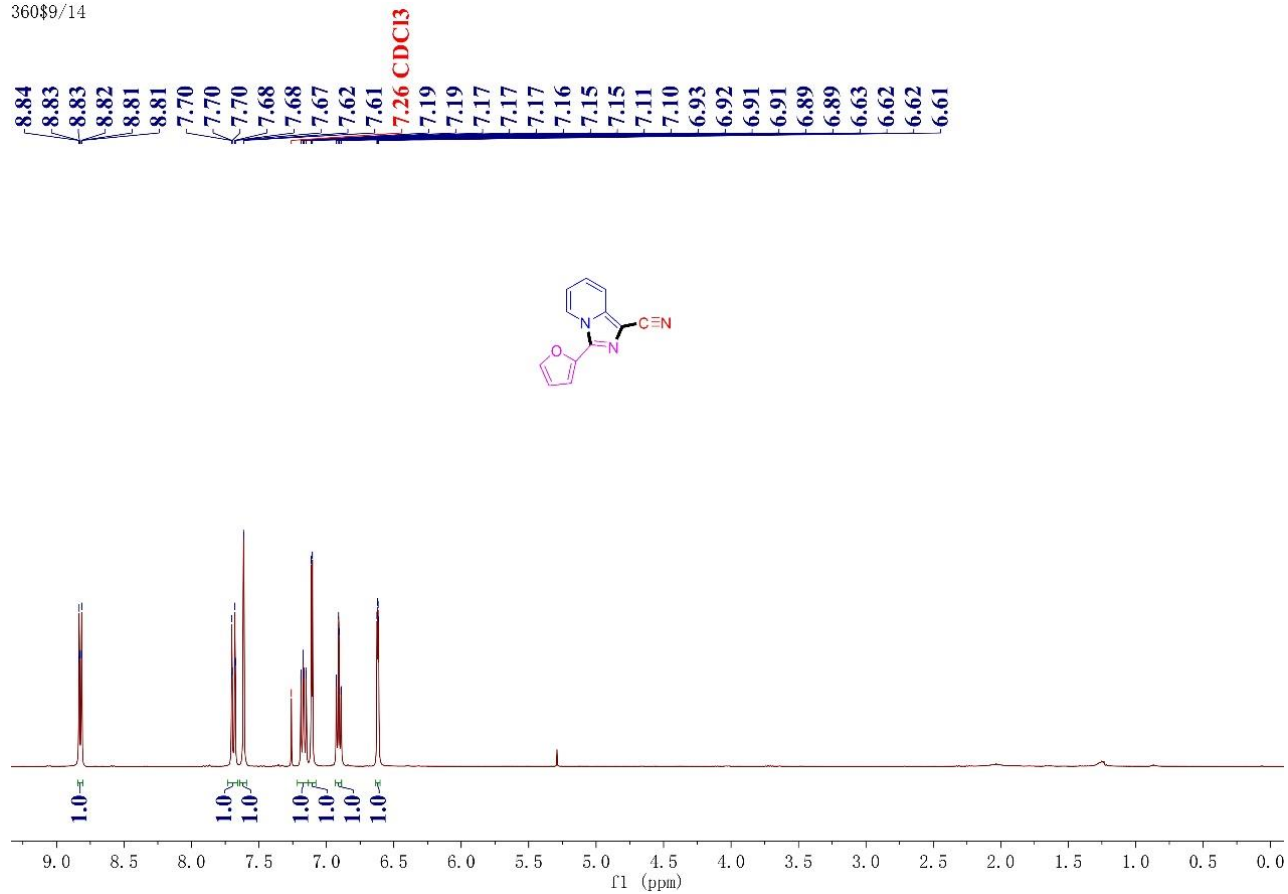

360\$8/13

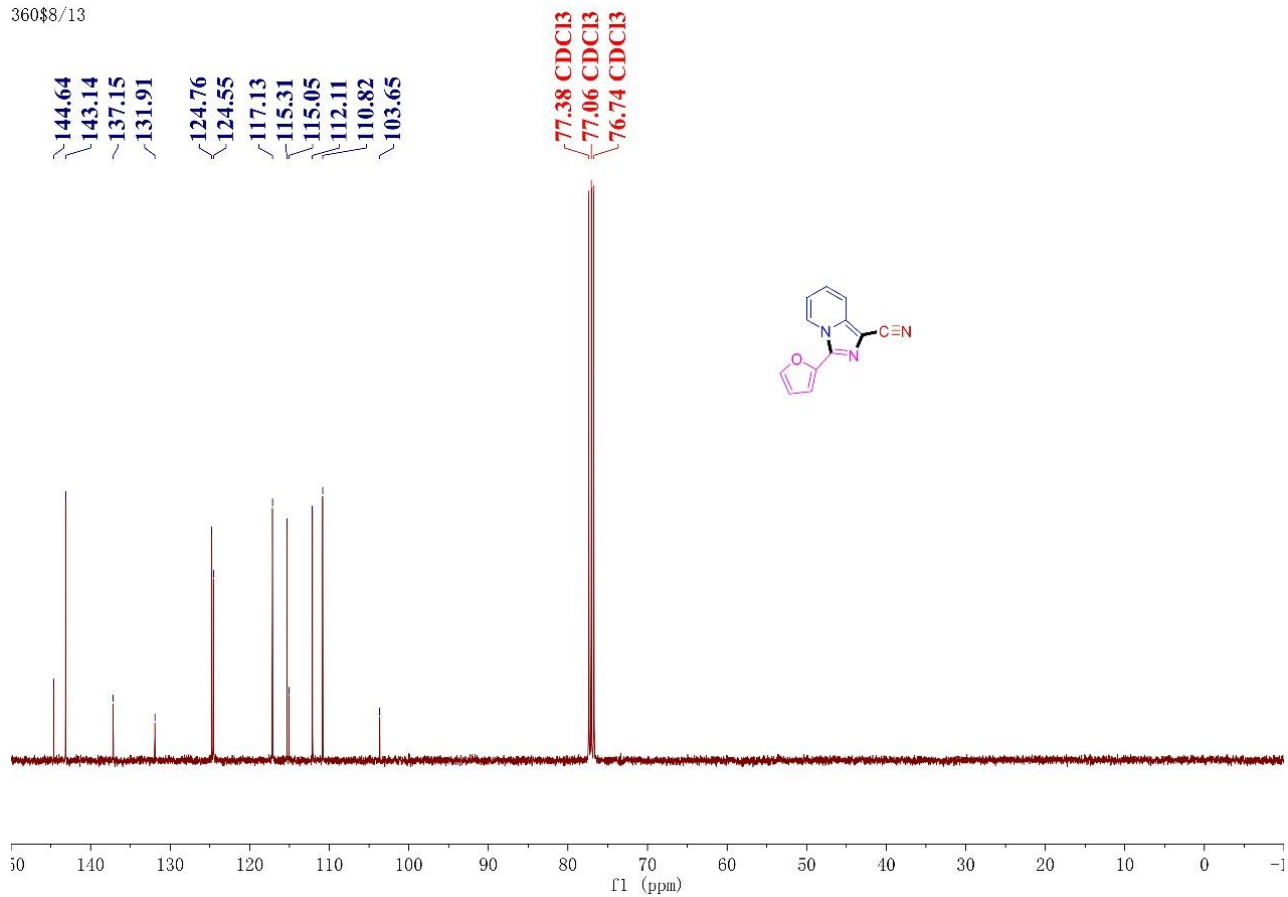

4an

冯20210110测试/YQ20201210-2

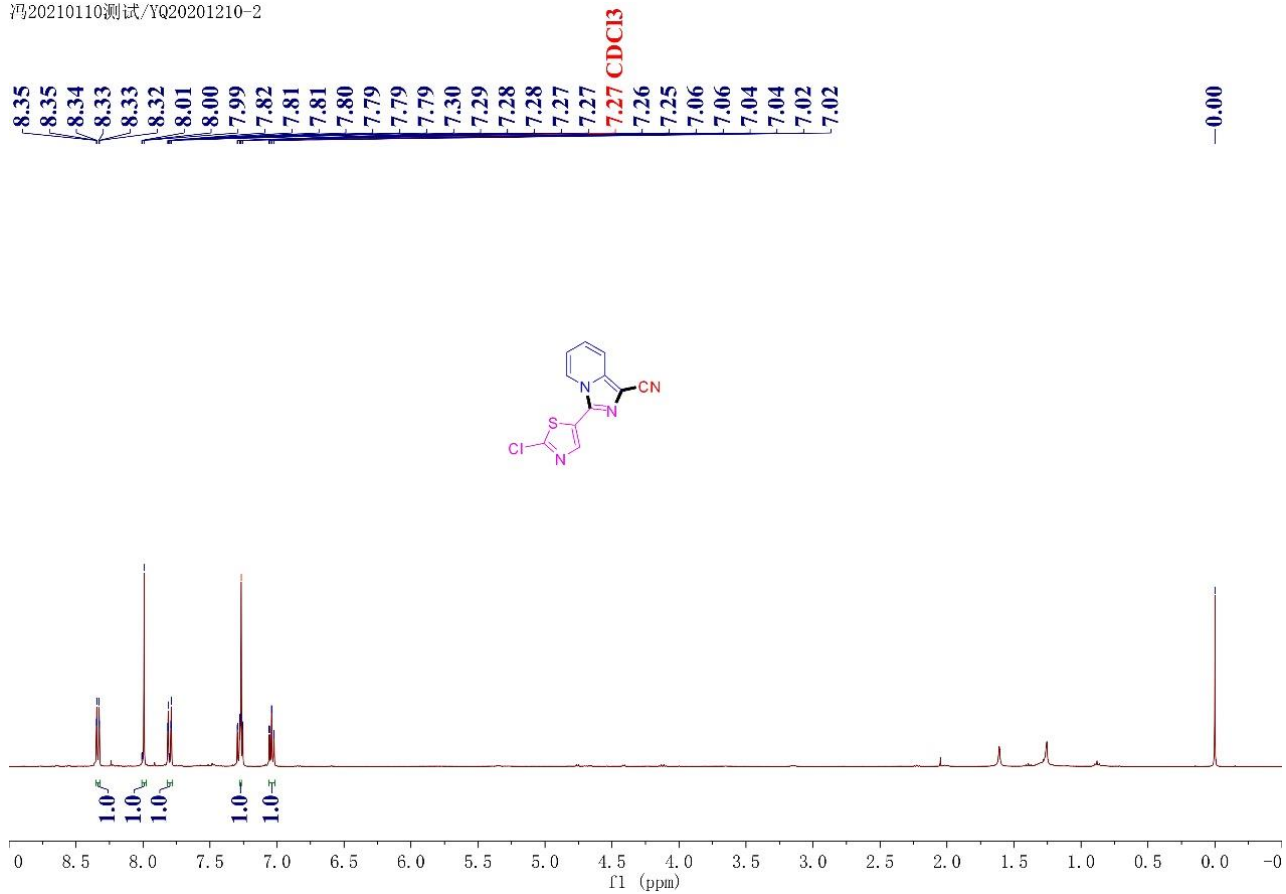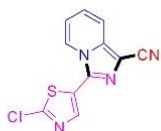

YQ20201210-2/33

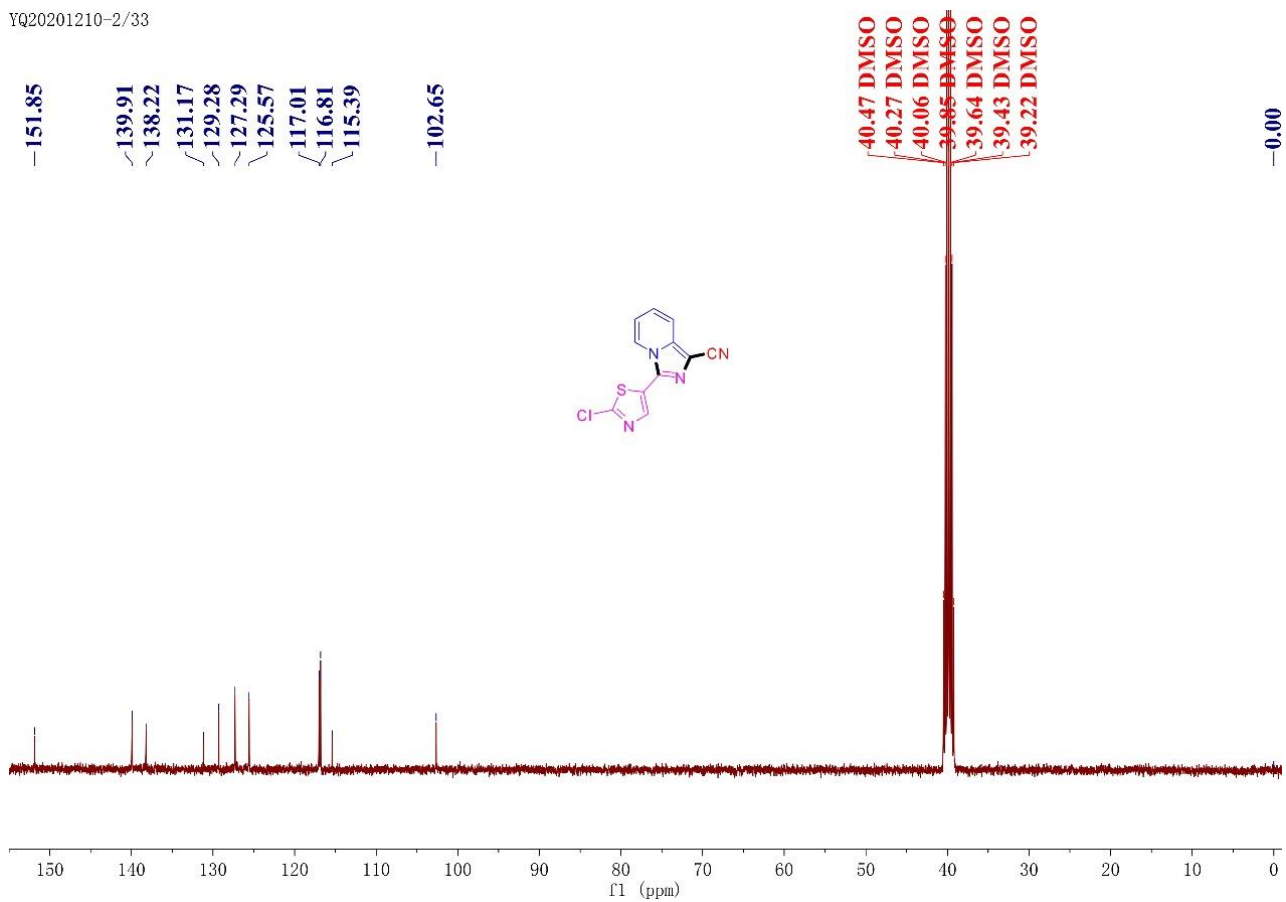

# 4ap

冯20210110测试/YQ20201125-1

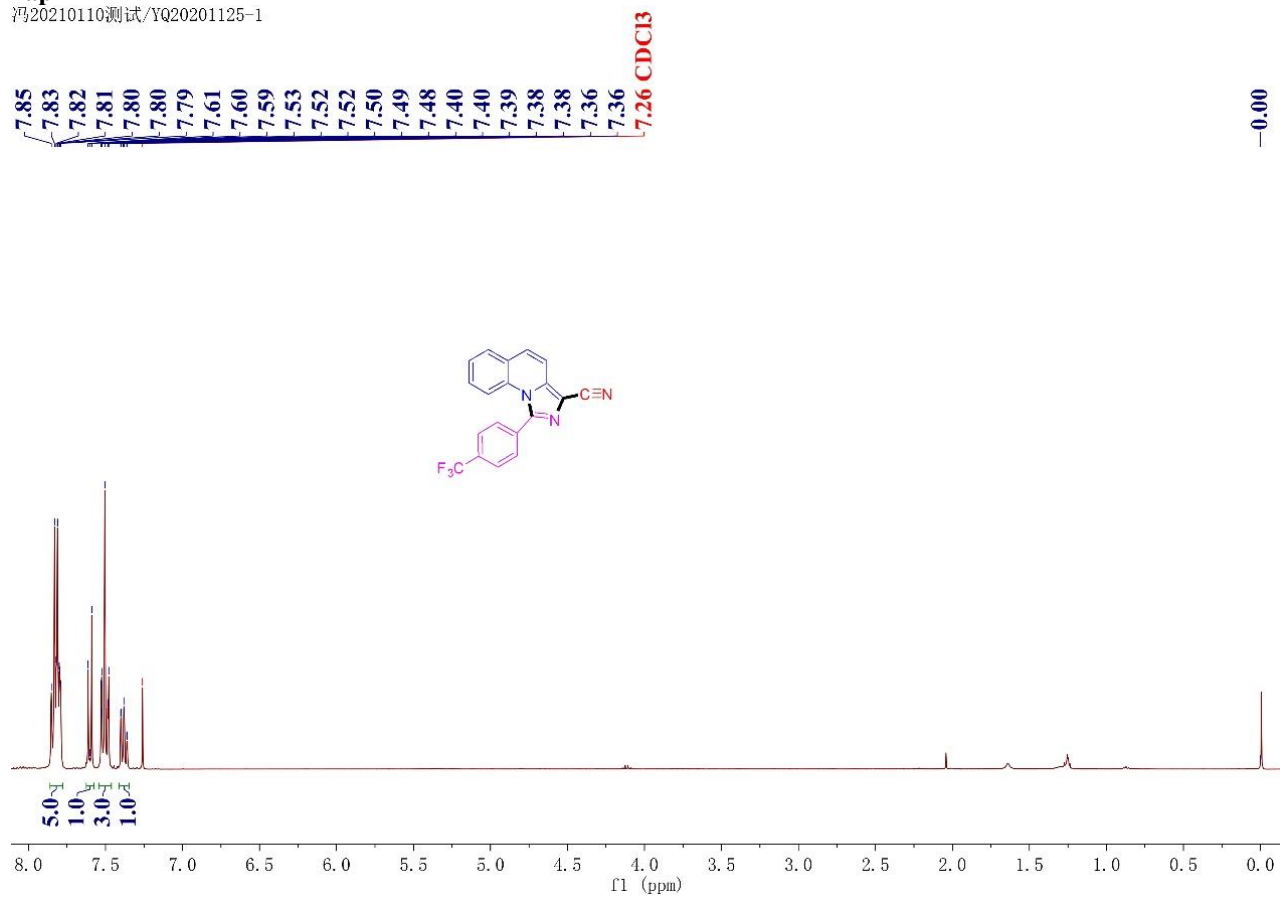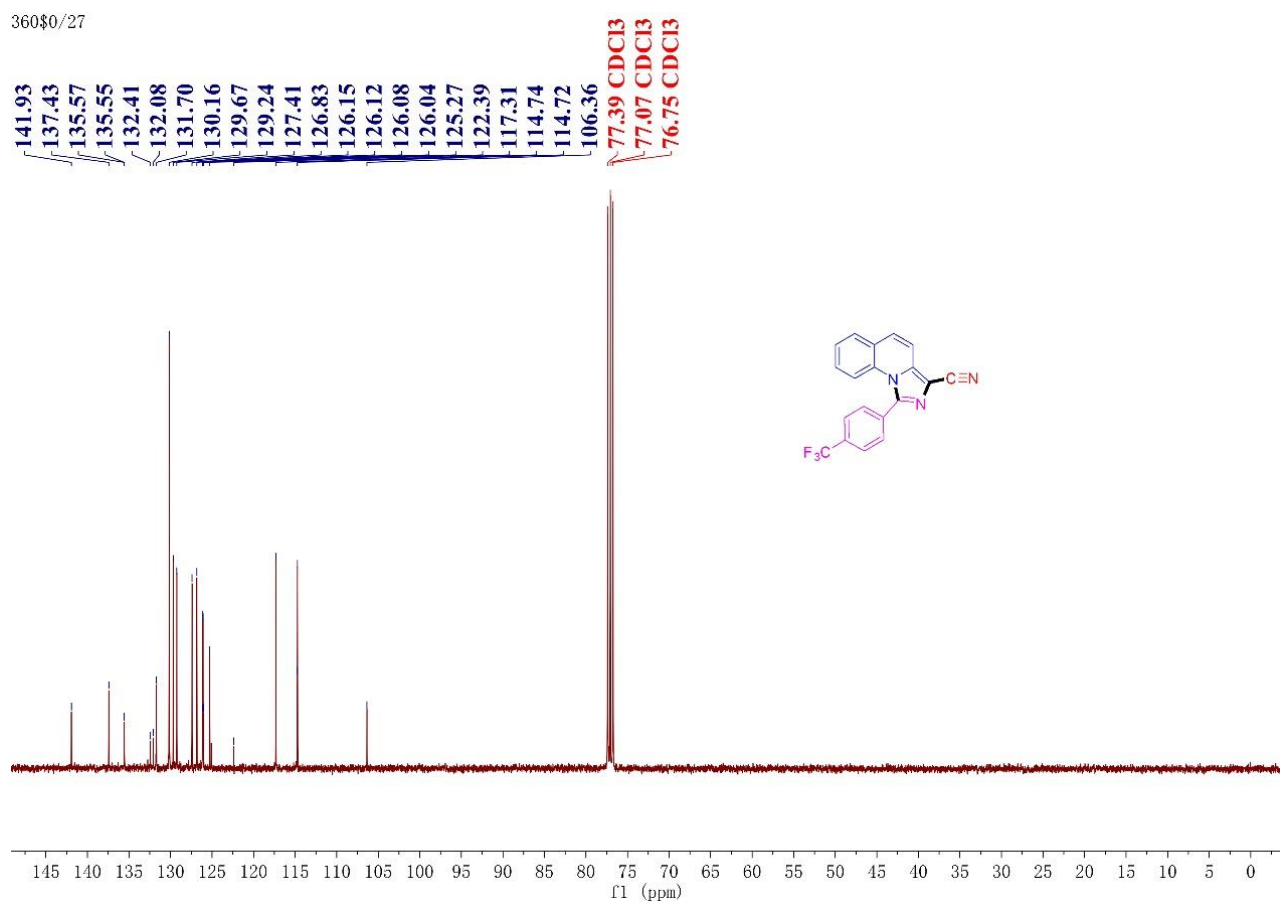



4aq

冯20210110测试/YQ20201125-2

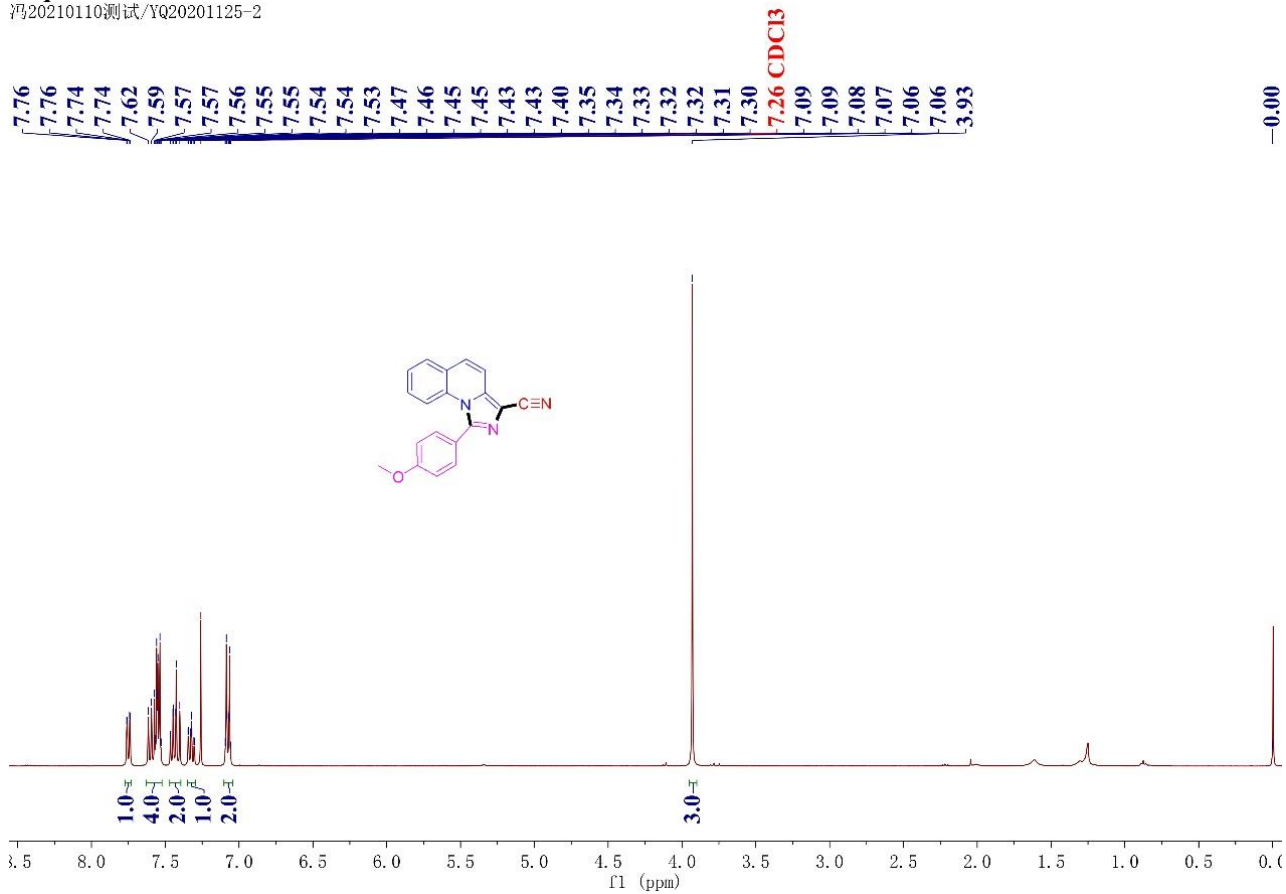

YQ20201125-2/24

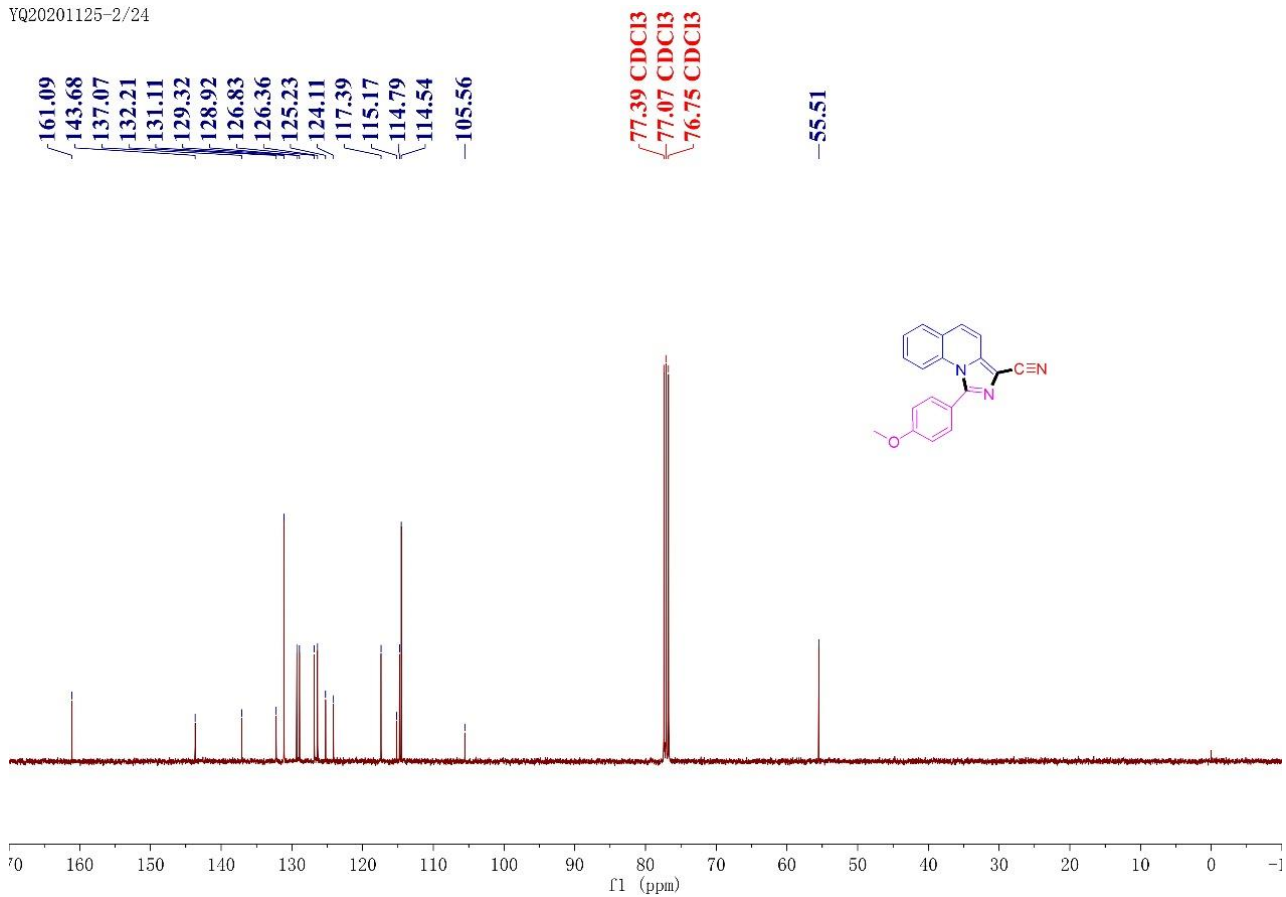

4ma

冯20210110测试/YQ20201130-1

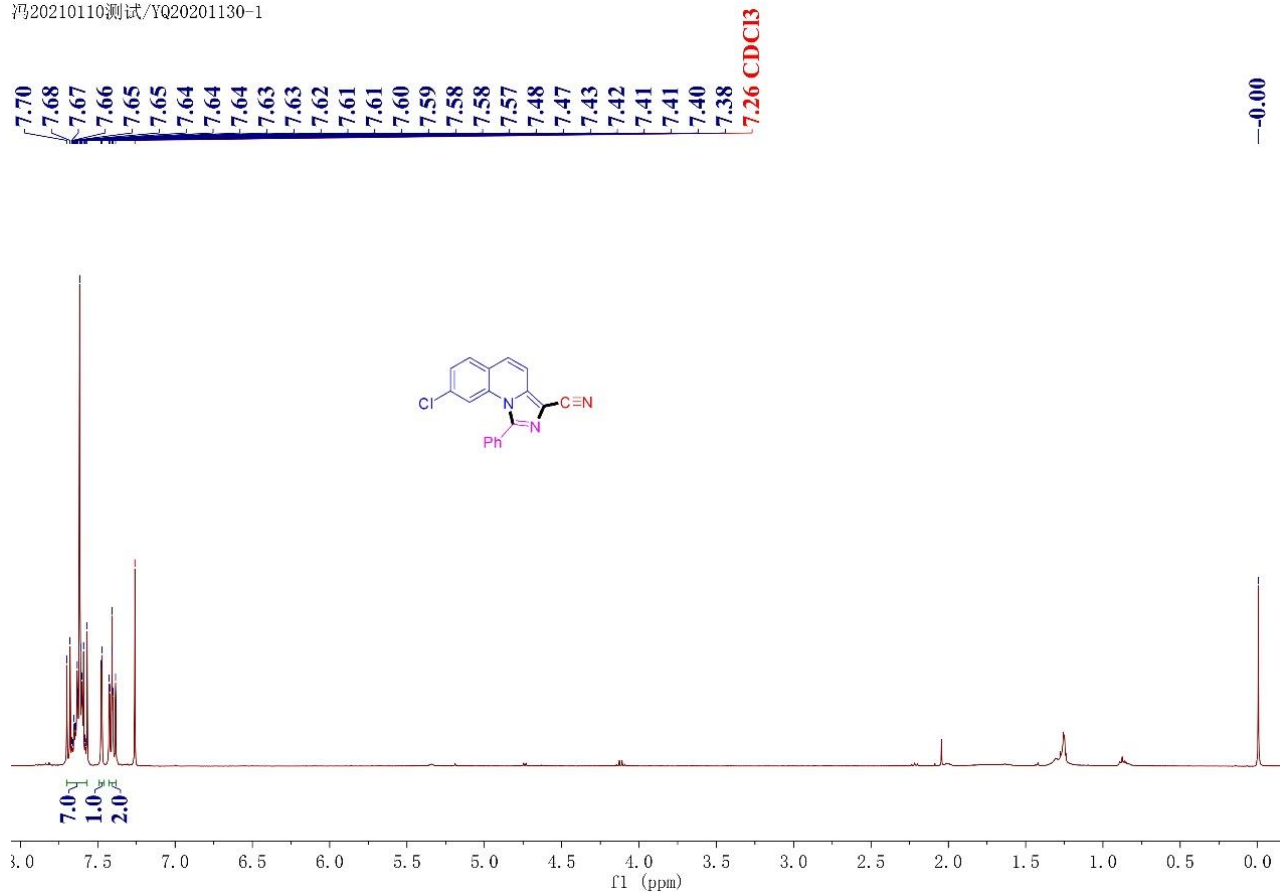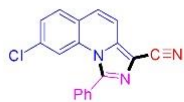

360\$2/32-DMSO

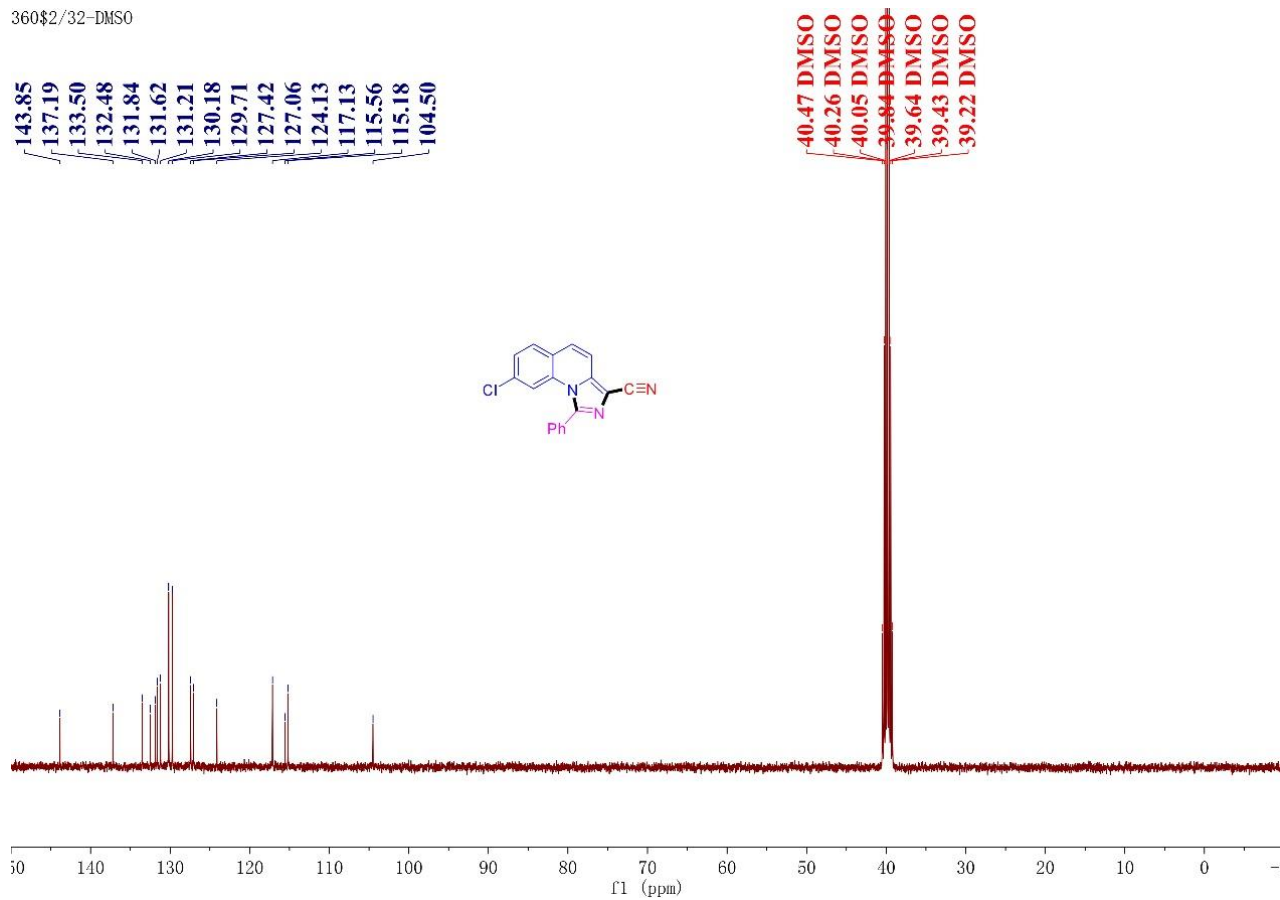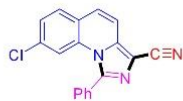

# Compound 6

20210119-nj-2101153286-cdx20210114-1.10.1

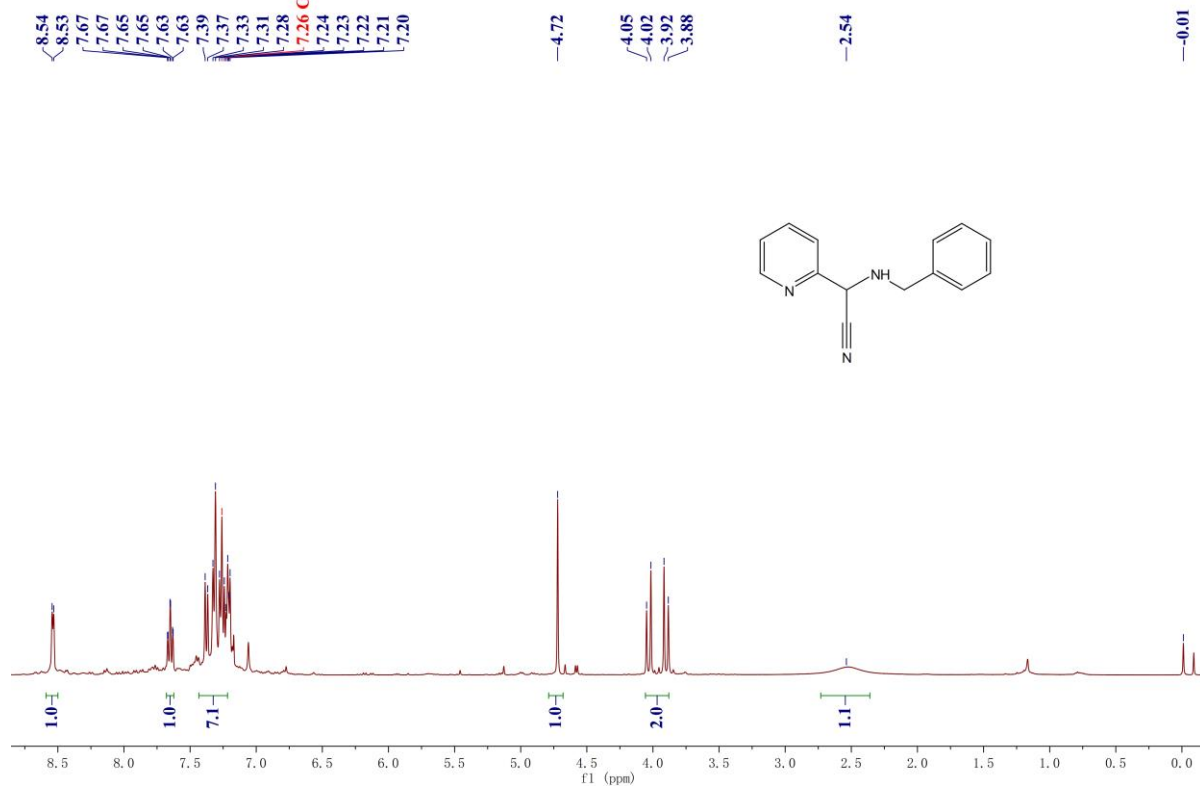

20210119-nj-2101153286-cdx20210114-4.10.1.fid

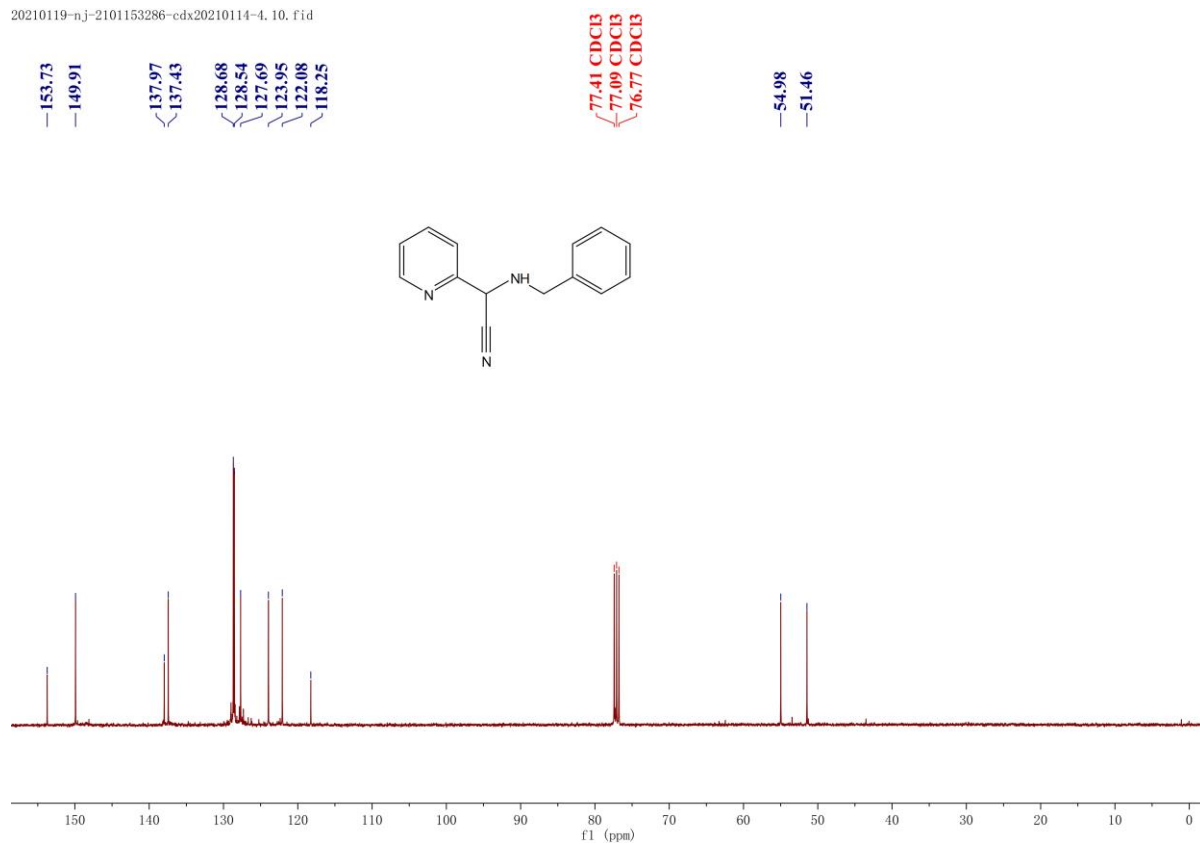

# Compound 7

馮20210110測試/YQ20201228-1

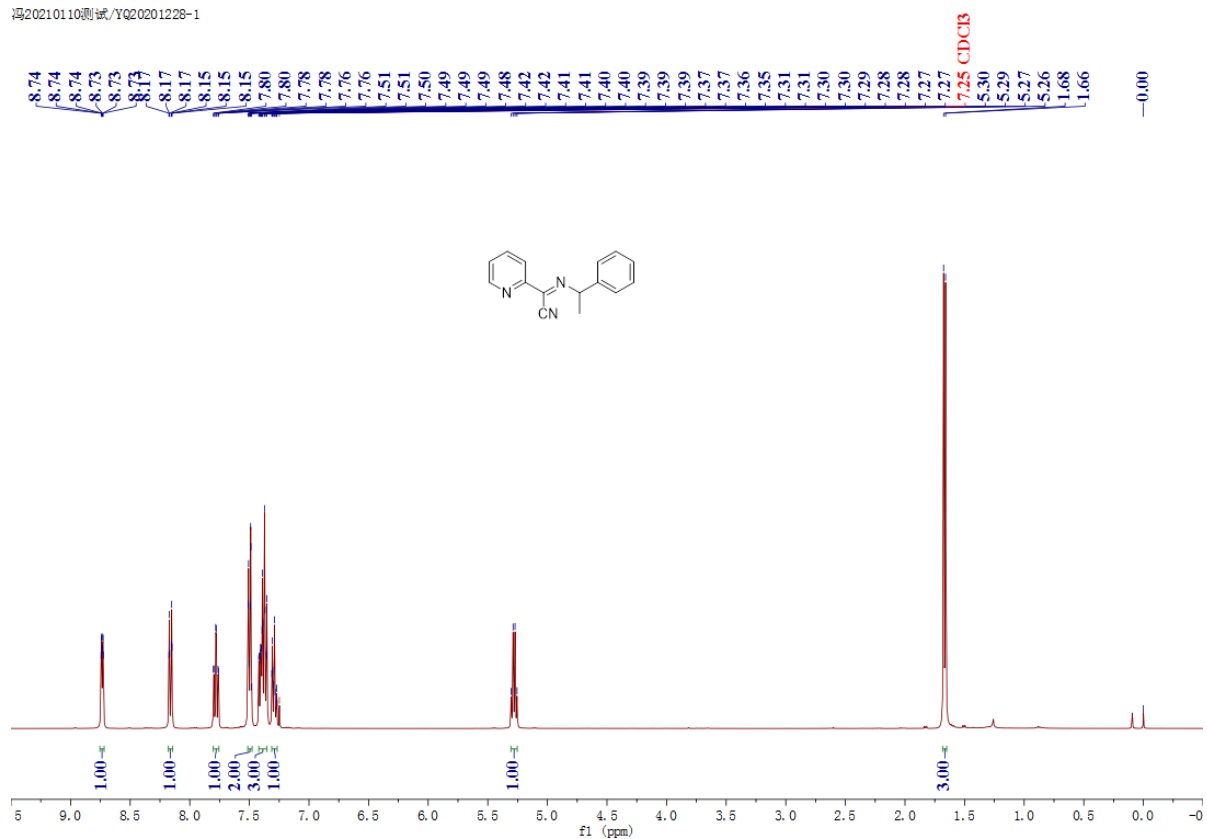

YQ20201228-1/20

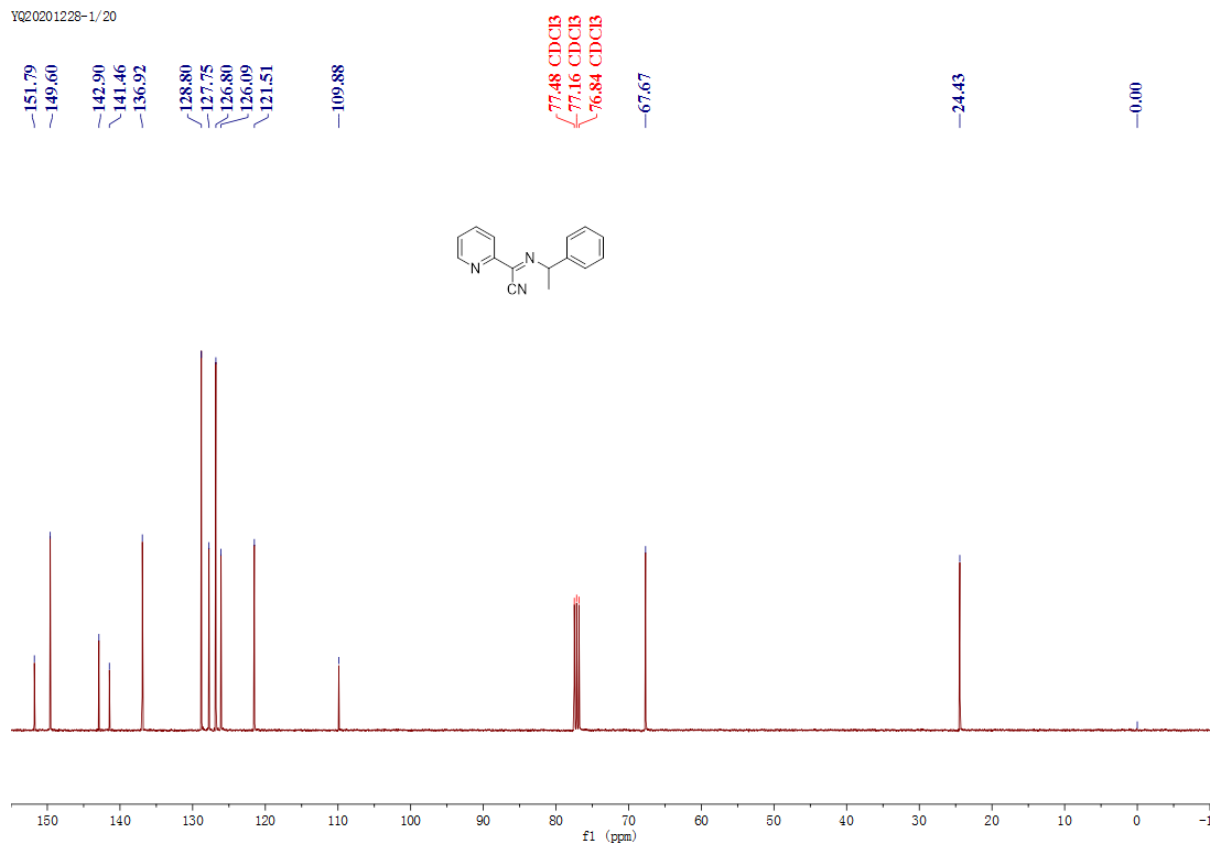

Supplement: d1qo01060c1.pdf [file d1qo01060c1.pdf]
